# Supplementary material for: A novel strategy for discovering inorganic solar-cell absorbers: leveraging octahedral features in ABX 3 structures
Source: Royal Society of Chemistry journal article supplement (doi:10.1039/d4ta07938h), 2025-01-01
Supplement: d4ta07938h1.xlsx [file d4ta07938h1.xlsx]

## Sheet: Octahedral_informations
Structure id	A	B	X	None ratio(B)	Corner ratio(B)	Edge ratio(B)	Face ratio(B)	Dvec(B)	Qel(B)	None ratio(A)	Corner ratio(A)	Edge ratio(A)	Face ratio(A)	Dvec(A)	Qel(A)
mp-571458	Rb	Ge	I	0	1	0	0	0	0.999792	-	-	-	-	-	-
mp-568570	Cs	Sn	I	0	1	0	0	7.25695e-16	1.00057	-	-	-	-	-	-
mp-616378	Cs	Sn	I	0	1	0	0	1.77765e-16	0.999884	-	-	-	-	-	-
mp-1227508	Sb	Bi	Se	0.333333	0	0.666667	0	0.498237	1.04852	-	-	-	-	-	-
mp-1212011	In	Sb	Se	0.333333	0	0.666667	0	0.0466869	1.02985	0.333333	0	0.666667	0	0.255464	1.00788
mp-1215924	Sb	Y	Te	0	0	1	0	0.309319	1.00261	0	0	1	0	0.451047	1.00652
mp-1069538	Cs	Pb	I	0	1	0	0	0	0.99991	-	-	-	-	-	-
mp-27214	Cs	Sn	Br	0	1	0	0	0	1.00022	-	-	-	-	-	-
mp-1223842	In	Bi	Se	0	0	1	0	0.413211	1.00688	0	0	1	0	0.457334	1.00896
mp-28377	Cs	Ge	I	0	1	0	0	0.88028	1.02298	-	-	-	-	-	-
icsd-138859	Ni	Mn	O	0	0.333333	0.666667	0	0.0620567	1.00792	-	-	-	-	-	-
mp-998157	Rb	Sn	Br	0	1	0	0	0.152904	1.00111	-	-	-	-	-	-
mp-614013	Cs	Sn	I	0	1	0	0	0	1.00003	-	-	-	-	-	-
mp-1222966	La	Sb	Se	0.333333	0	0.666667	0	0.445367	1.04305	-	-	-	-	-	-
mp-505766	Sr	Co	O	0.166667	0.833333	0	0	7.37792e-06	0.999673	-	-	-	-	-	-
mp-1078776	Bi	In	S	0	0	1	0	0.163418	1.00321	0.333333	0	0.666667	0	0.484583	1.01197
mp-5193	Sr	Zr	S	0	1	0	0	3.73517e-16	1.00008	-	-	-	-	-	-
mp-642690	Cs	Ge	I	0	1	0	0	0.573339	1.00926	-	-	-	-	-	-
mp-10328	La	Cr	S	0.333333	0	0.666667	0	0.0640429	1.01527	-	-	-	-	-	-
mp-21871	Ce	Cr	S	0.333333	0	0.666667	0	0.0575468	1.01318	-	-	-	-	-	-
mp-12027	Tl	Ta	Se	0.333333	0	0.666667	0	0.806877	1.01999	-	-	-	-	-	-
mp-1105715	Ge	Ti	S	0.333333	0	0.666667	0	0.126399	1.00143	-	-	-	-	-	-
mp-7781	Ca	Zr	S	0	1	0	0	3.97984e-16	1.0001	-	-	-	-	-	-
mp-3102	Cu	Ta	S	0.333333	0	0.666667	0	0.872945	1.02414	-	-	-	-	-	-
mp-1070375	Cs	Sn	Cl	0	1	0	0	0	0.999822	-	-	-	-	-	-
mp-540771	Ba	Zr	S	0	1	0	0	4.38394e-16	0.999906	-	-	-	-	-	-
mp-19201	Ca	Mn	O	0	1	0	0	1.22976e-05	1.00023	-	-	-	-	-	-
mp-1208643	Sr	Hf	S	0	1	0	0	3.84009e-06	1.0001	-	-	-	-	-	-
mp-15236	Sb	Cr	Se	0.333333	0	0.666667	0	0.124791	1.0071	-	-	-	-	-	-
mp-9130	Sb	Cr	S	0.333333	0	0.666667	0	0.113923	1.00994	-	-	-	-	-	-
mp-568318	K	Ta	Te	0	0	0	1	0.53327	1.0263	-	-	-	-	-	-
mp-1120768	Cs	Pb	I	0	1	0	0	1.98283e-14	1.00064	-	-	-	-	-	-
icsd-138750	Bi	In	S	0.333333	0	0.666667	0	0.185418	1.00822	-	-	-	-	-	-
mp-866850	Ca	Sn	S	0	0.333333	0.666667	0	6.9741e-16	1.00905	-	-	-	-	-	-
mp-1190098	Ca	Hf	S	0	1	0	0	2.68074e-14	0.999932	-	-	-	-	-	-
mp-1247749	Cs	Sn	Br	0	1	0	0	7.48129e-17	1.00022	-	-	-	-	-	-
mp-1215930	Bi	Y	Te	0	0	1	0	0.319858	1.00317	0	0	1	0	0.459046	1.0081
mp-1105549	Ba	Hf	S	0	1	0	0	1.50101e-16	0.999969	-	-	-	-	-	-
mp-10795	Tl	Ta	S	0.333333	0	0.666667	0	0.723439	1.01579	-	-	-	-	-	-
mp-1216763	Ti	V	O	0	1	0	0	0.662024	1.02052	0	1	0	0	0.838102	1.02052
mp-570223	Cs	Ge	Br	0	1	0	0	0	0.999856	-	-	-	-	-	-
mp-1105933	La	Cr	Se	0.333333	0	0.666667	0	0.044595	1.0134	-	-	-	-	-	-
mp-998427	Ba	Zr	Se	0.333333	0	0.666667	0	0.313644	1.00923	-	-	-	-	-	-
mp-1383356	Ba	Hf	S	0	1	0	0	0.263779	1.00224	-	-	-	-	-	-
mp-998398	In	Sn	Br	0	1	0	0	0.378025	1.0066	-	-	-	-	-	-
mp-541570	Sr	Zr	Se	0.333333	0	0.666667	0	0.326728	1.00523	-	-	-	-	-	-
mp-1211380	La	V	S	0.333333	0	0.666667	0	0.0745678	1.01396	-	-	-	-	-	-
mp-17324	Sn	Zr	S	0.333333	0	0.666667	0	0.208915	1.00319	-	-	-	-	-	-
mp-505819	Tl	Fe	O	0	1	0	0	5.41687e-16	1.00162	-	-	-	-	-	-
mp-1106239	Bi	Mn	O	0	1	0	0	0.199424	1.01999	-	-	-	-	-	-
mp-573119	Bi	Rh	O	0	1	0	0	6.51151e-16	1.00556	-	-	-	-	-	-
mp-1188095	Pb	Sn	S	0.333333	0	0.666667	0	0.20792	1.00368	-	-	-	-	-	-
mp-504580	Cu	V	O	0	0	1	0	0.867938	1.02839	0	0	1	0	1.08169	1.04295
mp-1101069	P	Cr	Se	0	0	1	0	0.164899	1.01054	-	-	-	-	-	-
icsd-118374	Mn	Ti	O	0	1	0	0	0.940198	1.02547	0	1	0	0	1.2123	1.06043
mp-19376	Mn	Ti	O	0	1	0	0	0.938432	1.02533	0	1	0	0	1.21473	1.06093
mp-998352	Ba	Hf	S	0	1	0	0	0.00429342	0.999936	-	-	-	-	-	-
mp-1369873	Y	Ag	O	0	1	0	0	1.77184e-14	1.06882	-	-	-	-	-	-
mp-866811	Ca	Sn	S	0.333333	0	0.666667	0	0.274499	1.00478	-	-	-	-	-	-
mp-9228	Se	Hg	O	0	1	0	0	4.11935e-16	1.04251	-	-	-	-	-	-
mp-20641	Co	Mn	O	0	0	1	0	0.418815	1.01094	0	0	1	0	0.980654	1.03273
mp-600089	Cs	Pb	Br	0	1	0	0	0	0.999723	-	-	-	-	-	-
mp-1205419	Sr	Sn	S	0.333333	0	0.666667	0	0.305373	1.00681	-	-	-	-	-	-
mp-8725	Sn	Hf	S	0.333333	0	0.666667	0	0.200341	1.00253	-	-	-	-	-	-
mp-1340758	Y	Cu	O	0	1	0	0	5.87177e-16	1.04969	-	-	-	-	-	-
mp-21365	Sb	In	S	0.333333	0	0.666667	0	0.328728	1.00702	-	-	-	-	-	-
mp-1193101	Sr	Mn	O	0	0.666667	0	0.333333	0.265667	1.00531	-	-	-	-	-	-
mp-756102	Mg	Co	O	0	1	0	0	4.04009e-16	1.00196	-	-	-	-	-	-
mp-20244	Pb	Zr	S	0.333333	0	0.666667	0	0.260096	1.00554	-	-	-	-	-	-
mp-998746	Tl	Ge	Br	0.333333	0	0.666667	0	0.370343	1.00879	-	-	-	-	-	-
mp-776165	Ag	Au	O	0	1	0	0	6.94459e-16	1.03805	-	-	-	-	-	-
mp-558760	Sr	Zr	S	0.333333	0	0.666667	0	0.367454	1.00964	-	-	-	-	-	-
mp-1273178	Y	Co	O	0	1	0	0	6.6061e-16	1.00376	-	-	-	-	-	-
mp-1106224	Mn	V	O	0	1	0	0	5.76349e-06	1.00206	-	-	-	-	-	-
mp-1105271	Bi	Mn	O	0	1	0	0	6.51691e-16	1.00527	-	-	-	-	-	-
mp-1105306	Tl	Cr	O	0	1	0	0	3.08591e-16	1.00171	-	-	-	-	-	-
mp-1225880	Cs	Ta	Se	0	0	0	1	0.621554	1.01157	-	-	-	-	-	-
mp-1194603	Bi	Mn	O	0	1	0	0	0.250742	1.01935	-	-	-	-	-	-
mp-998176	Rb	Pb	Br	0	1	0	0	0.235323	1.00239	-	-	-	-	-	-
mp-8695	P	Mn	Se	0	0	1	0	0.0463195	1.00854	-	-	-	-	-	-
mp-8829	Ga	Cr	Se	0.333333	0	0.666667	0	0.22888	1.00666	-	-	-	-	-	-
icsd-132720	Cu	Nb	O	0	1	0	0	0.731229	1.01578	-	-	-	-	-	-
mp-1183370	Ba	Sn	S	0.333333	0	0.666667	0	0.303618	1.00832	-	-	-	-	-	-
mp-542818	Ba	V	S	0	0	0	1	0.750601	1.01836	-	-	-	-	-	-
mp-756933	Tl	Ta	O	0	1	0	0	1.19804e-15	1.00024	-	-	-	-	-	-
mp-756062	Ce	Fe	O	0	1	0	0	7.12695e-05	1.00287	-	-	-	-	-	-
mp-755657	Ti	V	O	0	0	1	0	0.64463	1.01712	0	0	1	0	0.870516	1.02821
mp-1220387	Ag	Nb	O	0	1	0	0	1.55327e-16	0.999904	-	-	-	-	-	-
mp-19082	Mn	Ti	O	0	0	1	0	0.863279	1.02944	0	0	1	0	1.00589	1.03622
mp-757636	Tl	Nb	O	0	1	0	0	0.474585	1.00659	-	-	-	-	-	-
mp-25096	Bi	Ni	O	0	1	0	0	5.91804e-16	1.00534	-	-	-	-	-	-
mp-780260	Ge	Ti	O	0	0	1	0	0.162772	1.00416	-	-	-	-	-	-
mp-1105718	Bi	Ni	O	0	1	0	0	8.23305e-16	1.0115	-	-	-	-	-	-
mp-22147	Pb	Hf	S	0.333333	0	0.666667	0	0.261555	1.00491	-	-	-	-	-	-
mp-1079754	P	Ni	Se	0	0	1	0	0.0113637	1.0085	-	-	-	-	-	-
mp-676262	Tl	Ta	O	0	1	0	0	0.00404691	1.00018	-	-	-	-	-	-
mp-548231	Bi	Fe	O	0	1	0	0	0.788062	1.01923	-	-	-	-	-	-
mp-1378086	Zn	V	O	0	1	0	0	2.74295e-14	1.00677	-	-	-	-	-	-
mp-1101462	Tl	Nb	O	0	1	0	0	0.445151	1.00583	-	-	-	-	-	-
mp-776150	Ag	Sc	O	0	0.333333	0.666667	0	6.08091e-16	1.02377	-	-	-	-	-	-
mp-23501	Bi	Fe	O	0	1	0	0	0.782169	1.01894	-	-	-	-	-	-
mp-35078	Ba	Mn	O	0	0.5	0	0.5	0.375026	1.00857	-	-	-	-	-	-
icsd-164934	Cu	Ta	O	0	1	0	0	0.0475582	1.00025	-	-	-	-	-	-
mp-1180725	La	Co	O	0	1	0	0	0.762568	1.02197	-	-	-	-	-	-
mp-753026	Zn	Co	O	0.333333	0	0.666667	0	0.396279	1.01642	-	-	-	-	-	-
mp-998419	Ba	Hf	S	0.333333	0	0.666667	0	0.349825	1.01043	-	-	-	-	-	-
mp-1232360	Mg	Ce	Se	0	0	1	0	0.550127	1.01289	0	0	1	0	0.578814	1.01613
mp-754246	Sn	Ti	O	0	0	1	0	0.272315	1.00744	-	-	-	-	-	-
mp-998412	K	Ge	Br	0	1	0	0	0.737639	1.01849	-	-	-	-	-	-
mp-20772	Ca	Cr	O	0	1	0	0	0.000112378	1.00113	-	-	-	-	-	-
mp-1214788	Ba	Pt	O	0	0.571429	0	0.428571	0.421777	1.02275	-	-	-	-	-	-
mp-22649	Cd	V	O	0	1	0	0	3.63023e-16	1.00287	-	-	-	-	-	-
mp-768578	Cd	Co	O	0.333333	0	0.666667	0	0.593607	1.0341	-	-	-	-	-	-
mp-1435359	Ca	V	O	0	1	0	0	5.6679e-16	1.00157	-	-	-	-	-	-
mp-1370061	Mg	V	O	0	1	0	0	9.54163e-15	1.00347	-	-	-	-	-	-
mp-772528	Zn	Mn	O	0	1	0	0	5.14142e-16	1.00434	-	-	-	-	-	-
mp-23477	Bi	Mn	O	0	1	0	0	0.211143	1.01666	-	-	-	-	-	-
mp-1205362	Ag	Nb	O	0	1	0	0	3.59699e-16	0.999817	-	-	-	-	-	-
mp-557680	Ag	Nb	O	0	0.333333	0.666667	0	5.93207e-16	1.00803	-	-	-	-	-	-
mp-2349989	Ag	Nb	O	0	0.333333	0.666667	0	6.21716e-16	1.00774	-	-	-	-	-	-
mp-1205533	Tl	Sn	I	0	0.333333	0.666667	0	3.0714e-16	1.00168	-	-	-	-	-	-
icsd-231018	Cs	Pb	Br	0	1	0	0	1.86512e-16	1.00001	-	-	-	-	-	-
mp-753988	V	Cr	O	0.333333	0.416667	0.5	0.25	0.644074	1.01641	0.333333	0.416667	0.5	0.25	0.725866	1.01974
mp-1225870	Cs	Ta	S	0	0	0	1	0.739853	1.01762	-	-	-	-	-	-
mp-1279343	Ni	Co	O	0	0	1	0	0.350896	1.01032	0	0	1	0	0.886937	1.02846
mp-755199	Ge	V	O	0.333333	0	0.666667	0	0.223263	1.00685	-	-	-	-	-	-
mp-557535	Ba	Mn	O	0	0.25	0	0.75	0.238821	1.01138	-	-	-	-	-	-
mp-1232253	Ce	Mg	S	0	0	1	0	0.654673	1.01992	0	0	1	0	0.692859	1.0201
icsd-29117	Pb	Ti	O	0	1	0	0	0	1.00018	-	-	-	-	-	-
mp-1272234	Ni	Co	O	0	0	1	0	0.366901	1.01099	0	0	1	0	0.921214	1.03029
mp-22608	Ca	V	O	0	1	0	0	5.95501e-16	1.00087	-	-	-	-	-	-
mp-18840	Ba	Mn	O	0	0.333333	0	0.666667	0.275951	1.01105	-	-	-	-	-	-
mp-567629	Cs	Pb	Br	0	1	0	0	1.38131e-16	1.0001	-	-	-	-	-	-
mp-20073	Fe	Ti	O	0	1	0	0	2.23982e-05	1.00204	-	-	-	-	-	-
mp-1218206	Sr	Mn	O	0	0.5	0	0.5	0.351592	1.00669	-	-	-	-	-	-
mp-998527	Bi	Ni	O	0	1	0	0	0.621808	1.01535	0	1	0	0	1.07007	1.05219
mp-761337	Sr	Cr	O	0	0.666667	0	0.333333	0.393771	1.0078	-	-	-	-	-	-
mp-19001	Sr	Mn	O	0	0.5	0	0.5	0.349212	1.00666	-	-	-	-	-	-
mp-770855	V	Cr	O	0.333333	0.583333	0.333333	0.25	0.653243	1.01674	0.333333	0.583333	0.333333	0.25	0.729431	1.01986
mp-1014168	Cs	Pb	Br	0	1	0	0	4.42968e-16	1.00004	-	-	-	-	-	-
mp-1190131	La	Sc	S	0	1	0	0	0.00800575	1.00065	-	-	-	-	-	-
mp-5163	La	Rh	O	0	1	0	0	2.00624e-14	1.00134	-	-	-	-	-	-
icsd-622042	Ce	Sc	S	0	1	0	0	0.00604136	1.00076	-	-	-	-	-	-
mp-770843	V	Cr	O	0.166667	0.333333	0.5	0.25	0.642226	1.01643	0.166667	0.333333	0.5	0.25	0.72238	1.01935
mp-19417	Fe	Ti	O	0	0	1	0	0.826441	1.02559	0	0	1	0	0.843466	1.02512
mp-1105819	In	Rh	O	0	1	0	0	5.02783e-16	1.00643	-	-	-	-	-	-
mp-866826	Ca	Sn	S	0	0	1	0	0.392496	1.01413	0	0	1	0	0.988337	1.03629
mp-977408	Tl	Nb	O	0	1	0	0	2.16356e-07	0.999662	-	-	-	-	-	-
mp-1178214	Fe	Sn	O	0	1	0	0	0.000478972	1.00531	-	-	-	-	-	-
mp-545999	Ag	Sb	O	0	0	1	0	0.187717	1.01633	0	0	1	0	1.145	1.07388
icsd-23422	Y	Sc	S	0	1	0	0	0.00266117	1.00074	-	-	-	-	-	-
mp-757501	Ba	Mn	O	0	0.333333	0	0.666667	0.280423	1.01056	-	-	-	-	-	-
icsd-641844	La	Sc	S	0	1	0	0	0.00761932	1.00045	-	-	-	-	-	-
mp-1209191	Rb	Pb	Cl	0	1	0	0	0	1.00002	-	-	-	-	-	-
mp-18769	Ce	V	O	0	1	0	0	1.96753e-14	1.0012	-	-	-	-	-	-
mp-754124	Sc	Co	O	0	1	0	0	1.40105e-05	1.00638	-	-	-	-	-	-
mp-19885	Ga	In	S	0.333333	0.333333	0.666667	0	0.433008	1.00758	-	-	-	-	-	-
mp-755580	Ga	V	O	0	1	0	0	1.79019e-14	1.01357	-	-	-	-	-	-
mp-770581	Mg	Mn	O	0	1	0	0	4.77187e-16	1.00319	-	-	-	-	-	-
mp-23037	Cs	Pb	Cl	0	1	0	0	0	0.999953	-	-	-	-	-	-
mp-675022	Cs	Pb	Cl	0	1	0	0	4.39802e-16	1.00178	-	-	-	-	-	-
icsd-27949	Pb	Ti	O	0	1	0	0	0	1.00015	-	-	-	-	-	-
mp-675227	Ba	Mn	O	0	0.2	0	0.8	0.208262	1.01047	-	-	-	-	-	-
mp-20953	Ce	Sc	S	0	1	0	0	6.42227e-16	1.00063	-	-	-	-	-	-
mp-1068340	Cs	Ge	Br	0	1	0	0	0.79567	1.01964	-	-	-	-	-	-
mp-1120725	Cs	Pb	Br	0	1	0	0	0.00477197	1.00008	-	-	-	-	-	-
mp-770849	V	Cr	O	0.25	0.416667	0.5	0.25	0.645216	1.01646	0.25	0.333333	0.5	0.25	0.725086	1.0197
mp-7792	Y	Sc	S	0	1	0	0	1.97599e-16	1.00059	-	-	-	-	-	-
mp-754036	Cr	V	O	0.25	0.416667	0.5	0.25	0.724071	1.01953	0.25	0.333333	0.5	0.25	0.642666	1.01638
mp-556925	Mn	Ti	O	0	1	0	0	0.000209136	1.00089	-	-	-	-	-	-
mp-755281	V	Cr	O	0.333333	0.583333	0.333333	0.25	0.654512	1.01684	0.333333	0.583333	0.333333	0.25	0.726281	1.01986
mp-19845	Pb	Ti	O	0	1	0	0	5.42847e-08	0.999975	-	-	-	-	-	-
mp-676040	P	Ni	S	0	0	1	0	0.00547195	1.00787	-	-	-	-	-	-
mp-769855	Sr	Cr	O	0	0.5	0	0.5	0.389552	1.0082	-	-	-	-	-	-
mp-19270	Ti	Fe	O	0	1	0	0	0.896565	1.03368	0	1	0	0	0.910246	1.02362
mp-12725	Ag	Nb	O	0	1	0	0	0	0.999831	-	-	-	-	-	-
mp-1216392	V	Cr	O	0	1	0	0	0.662923	1.01659	0	1	0	0	0.723263	1.02052
mp-1279364	Mg	Fe	O	0	0	1	0	0.57406	1.02367	0	0	1	0	0.977074	1.03447
mp-1207629	Y	Rh	O	0	1	0	0	4.24051e-16	1.00223	-	-	-	-	-	-
mp-1178212	Fe	Sn	O	0	0	1	0	0.69004	1.02034	0	0	1	0	1.01887	1.03688
icsd-230608	Ag	Ta	O	0	1	0	0	1.56826e-16	1.00018	-	-	-	-	-	-
mp-770779	V	Cr	O	0.0833333	0.5	0.5	0	0.64322	1.01623	0.0833333	0.5	0.5	0	0.724654	1.01969
mp-17272	Cu	Nb	O	0.166667	0.333333	0.5	0	0.88952	1.0287	-	-	-	-	-	-
mp-1178563	Ag	As	O	0	0	1	0	0.117197	1.01495	-	-	-	-	-	-
icsd-22272	Rb	Pb	Br	0	1	0	0	1.88661e-14	1.00011	-	-	-	-	-	-
mp-1101715	V	Cr	O	0.166667	0.5	0.5	0	0.644386	1.01647	0.166667	0.5	0.5	0	0.719816	1.01923
mp-1277107	Ti	Fe	O	0	0	1	0	0.837313	1.02734	0	0	1	0	0.882891	1.02878
icsd-118375	Mn	Sn	O	0	1	0	0	0.616028	1.01334	0	1	0	0	1.31324	1.06414
mp-23456	Bi	Cr	O	0	1	0	0	0.189913	1.00807	-	-	-	-	-	-
mp-691106	Mn	Sn	O	0	1	0	0	0.626115	1.01418	0	1	0	0	1.29004	1.06201
mp-19156	Ba	Mn	O	0	0	0	1	2.57792e-16	1.01189	-	-	-	-	-	-
mp-1205336	Ba	Mn	O	0	0	0	1	0.00950783	1.01194	-	-	-	-	-	-
mp-998153	Tl	Ge	Br	0	1	0	0	0.797084	1.02218	-	-	-	-	-	-
mp-759744	Fe	Mn	O	0.181818	0.409091	0.636364	0	0.488482	1.05456	0.26087	0.391304	0.608696	0	0.44909	1.0639
mp-770778	V	Cr	O	0.166667	0.666667	0.166667	0.25	0.657421	1.01676	0.166667	0.666667	0.166667	0.25	0.728531	1.02013
mp-1203220	In	Rh	O	0	1	0	0	7.7395e-16	1.02263	-	-	-	-	-	-
icsd-60350	Cs	Ge	Br	0	1	0	0	0.801799	1.0202	-	-	-	-	-	-
mp-757023	V	Cr	O	0.166667	0.666667	0.166667	0.25	0.657792	1.01676	0.166667	0.666667	0.166667	0.25	0.724454	1.01994
mp-756546	Sc	V	O	0	1	0	0	1.70583e-05	1.00642	-	-	-	-	-	-
mp-22334	Ge	Fe	O	0.333333	0	0.666667	0	0.204223	1.01155	-	-	-	-	-	-
icsd-34293	Tl	Pb	I	0	0.333333	0.666667	0	4.47999e-16	1.0024	-	-	-	-	-	-
mp-643577	Ge	Mn	O	0.333333	0	0.666667	0	0.440441	1.03119	-	-	-	-	-	-
mp-27552	Tl	Pb	I	0	0.333333	0.666667	0	6.1937e-16	1.00238	-	-	-	-	-	-
mp-1068577	Pb	Zr	O	0	1	0	0	0	0.999994	-	-	-	-	-	-
mp-775767	As	Ag	O	0.333333	0	0.666667	0	0.129418	1.03113	-	-	-	-	-	-
mp-756282	Bi	V	O	0	1	0	0	3.0956e-16	1.0011	-	-	-	-	-	-
mp-1188414	Sr	Tc	O	0	1	0	0	1.96802e-14	1.00028	-	-	-	-	-	-
icsd-237537	Bi	Fe	O	0	1	0	0	0.793564	1.01969	-	-	-	-	-	-
mp-29288	Tl	Ge	I	0.333333	0	0.666667	0	0.212279	1.00264	-	-	-	-	-	-
mp-998605	Rb	Pb	Cl	0	1	0	0	0.283483	1.00405	-	-	-	-	-	-
mp-19267	Ba	Mn	O	0	0	0	1	0.0386299	1.01453	-	-	-	-	-	-
mp-559851	Bi	Cr	O	0	1	0	0	0.00031386	1.00056	-	-	-	-	-	-
mp-20569	Mn	Sn	O	0	0	1	0	0.649186	1.01983	0	0	1	0	1.12633	1.04256
mp-1283250	Ba	Co	O	0	0	0	1	0.000471175	1.01464	-	-	-	-	-	-
mp-755790	Pb	Hf	O	0	1	0	0	1.02906e-14	0.999818	-	-	-	-	-	-
mp-780712	Ce	Cr	O	0	1	0	0	0.00325944	1.00041	-	-	-	-	-	-
mp-755798	Pb	Zr	O	0	1	0	0	4.86459e-16	1.0001	-	-	-	-	-	-
mp-20699	Y	Mn	O	0	1	0	0	2.9808e-16	1.00963	-	-	-	-	-	-
mp-18883	Y	V	O	0	1	0	0	0.000140592	1.00354	-	-	-	-	-	-
icsd-138703	La	Cr	O	0	1	0	0	0	1.00026	-	-	-	-	-	-
mp-1232516	P	Mn	S	0	0	1	0	0.0488505	1.0066	-	-	-	-	-	-
mp-19331	Ni	Mn	O	0	0	1	0	0.428042	1.01138	0	0	1	0	0.916595	1.02902
mp-22535	Pb	Hf	O	0	1	0	0	2.81185e-07	1.00003	-	-	-	-	-	-
mp-1100803	Pb	Zr	O	0	1	0	0	1.08325	1.03814	-	-	-	-	-	-
mp-9890	Ag	Ta	O	0	1	0	0	5.35562e-16	0.999525	-	-	-	-	-	-
mp-776083	Sn	Hf	O	0	0	1	0	0.0188897	1.0076	-	-	-	-	-	-
icsd-230607	Ag	Ta	O	0	1	0	0	3.75738e-16	1.00005	-	-	-	-	-	-
mp-1289597	B	Mn	O	0	1	0	0	0.0340536	1.01089	-	-	-	-	-	-
icsd-40830	Ag	Ta	O	0	1	0	0	0.00313032	0.999837	-	-	-	-	-	-
mp-752613	Co	Sn	O	0	1	0	0	8.15246e-16	1.00697	-	-	-	-	-	-
mp-1196890	Sc	Rh	O	0	1	0	0	9.17401e-16	1.02128	-	-	-	-	-	-
mp-647557	Pb	Zr	O	0	1	0	0	0.54514	1.01054	-	-	-	-	-	-
mp-546027	Bi	Cr	O	0	1	0	0	0.420634	1.00693	-	-	-	-	-	-
mp-765647	Al	V	O	0.166667	0	0.833333	0	0.114112	1.01048	-	-	-	-	-	-
mp-5537	Ag	Nb	O	0	1	0	0	0.677118	1.01352	-	-	-	-	-	-
mp-20337	Pb	Zr	O	0	1	0	0	0.805368	1.02041	-	-	-	-	-	-
mp-542903	Pb	Zr	O	0	1	0	0	0.755324	1.02012	-	-	-	-	-	-
mp-755382	Sb	Bi	O	0	0	1	0	1.20082	1.09548	-	-	-	-	-	-
mp-669414	Pb	Hf	O	0	1	0	0	0.731196	1.01995	-	-	-	-	-	-
mp-8613	P	Mn	S	0	0	1	0	0.0230813	1.00697	-	-	-	-	-	-
mp-21094	Fe	In	O	0	0	1	0	6.0669e-16	1.02943	-	-	-	-	-	-
mp-29405	Rb	Sn	I	0.333333	0	0.666667	0	0.268316	1.00508	-	-	-	-	-	-
mp-30284	Hg	As	O	0	0	1	0	6.55576e-14	1.01211	-	-	-	-	-	-
mp-754318	Zn	Mn	O	0	0	1	0	0.372631	1.00994	0	0	1	0	1.21937	1.04794
mp-22734	Pb	Hf	O	0	1	0	0	0.631662	1.01456	-	-	-	-	-	-
mp-561102	Bi	In	O	0	1	0	0	3.17736e-16	1.00317	-	-	-	-	-	-
mp-1203481	Ag	Nb	O	0	1	0	0	0.680445	1.01353	-	-	-	-	-	-
mp-1643785	Sc	Co	O	0	1	0	0	6.14906e-06	1.00459	-	-	-	-	-	-
mp-860791	Ag	Sb	O	0	0.666667	0.333333	0	0.266812	1.01065	-	-	-	-	-	-
mp-5323	Ce	Al	O	0	1	0	0	0	1.0002	-	-	-	-	-	-
mp-1105811	Sc	Mn	O	0	1	0	0	7.12875e-05	1.02009	-	-	-	-	-	-
mp-1188449	Sc	Rh	O	0	1	0	0	5.21502e-16	1.00252	-	-	-	-	-	-
mp-556857	V	Cd	O	0.333333	0.333333	0.666667	0	0.740718	1.07122	-	-	-	-	-	-
icsd-24467	Zn	Mn	O	0	0	1	0	0.369769	1.00966	0	0	1	0	1.21658	1.04771
icsd-230497	Cs	Pb	Cl	0	1	0	0	3.50045e-16	1.00023	-	-	-	-	-	-
mp-756082	V	Al	O	0	1	0	0	5.52243e-16	1.00418	-	-	-	-	-	-
mp-551918	Bi	Al	O	0	1	0	0	0.459398	1.0063	-	-	-	-	-	-
mp-642739	Cs	Ge	Br	0	1	0	0	0.639912	1.01236	-	-	-	-	-	-
mp-1273627	Ni	V	O	0	0	1	0	0.762568	1.02197	0	0	1	0	0.76415	1.0208
mp-27381	Cs	Sn	I	0.333333	0	0.666667	0	0.272954	1.00475	-	-	-	-	-	-
mp-776167	Ce	Al	O	0	1	0	0	2.33972e-16	0.999938	-	-	-	-	-	-
mp-21434	C	Co	O	0	1	0	0	6.80088e-16	1.00069	-	-	-	-	-	-
mp-4096	Ce	Al	O	0	1	0	0	6.22773e-16	0.999866	-	-	-	-	-	-
icsd-236142	Ce	Al	O	0	1	0	0	5.41321e-16	0.999655	-	-	-	-	-	-
mp-18814	C	Mn	O	0	1	0	0	0.00316295	1.00102	-	-	-	-	-	-
mp-19350	La	V	O	0	1	0	0	1.49353e-05	1.00039	-	-	-	-	-	-
icsd-62863	P	Mn	S	0	0	1	0	0.00613534	1.006	-	-	-	-	-	-
mp-754103	Ca	Ni	O	0	0	0	1	0.0701259	1.01406	-	-	-	-	-	-
mp-754508	Mg	Fe	O	0	0	1	0	0.324844	1.0112	0	0	1	0	1.01995	1.03678
mp-1097015	K	Sn	I	0.333333	0	0.666667	0	0.445931	1.01219	-	-	-	-	-	-
icsd-8433	C	Mn	O	0	1	0	0	6.73785e-16	1.00052	-	-	-	-	-	-
mp-1101383	Bi	Sc	O	0	0	1	0	0.76217	1.03501	0	0	1	0	1.08945	1.04935
mp-776207	Ce	Ni	O	0	1	0	0	3.76054e-05	1.00141	-	-	-	-	-	-
mp-22949	Bi	Fe	O	0	1	0	0	0.755919	1.01833	-	-	-	-	-	-
mp-754342	Fe	Sc	O	0	0	1	0	1.43258e-15	1.04833	-	-	-	-	-	-
mp-4784	Ca	Pt	O	0	0.333333	0.666667	0	2.22368e-14	1.02089	-	-	-	-	-	-
mp-1209810	Te	Ni	O	0	1	0	0	3.40002e-16	1.00841	-	-	-	-	-	-
mp-649086	Ga	Fe	O	0.333333	0.5	0.5	0	0.962775	1.03275	-	-	-	-	-	-
mp-756205	Bi	Sc	O	0	1	0	0	3.791e-16	1.00044	-	-	-	-	-	-
mp-19241	Ba	Ni	O	0	0	0	1	0.00307387	1.01135	-	-	-	-	-	-
mp-756147	In	Cr	O	0	1	0	0	0.000277623	1.00309	-	-	-	-	-	-
mp-19138	Ba	Ni	O	0	0	0	1	4.79684e-16	1.01188	-	-	-	-	-	-
mp-3408	Ce	Al	O	0	1	0	0	2.0174e-14	1.0005	-	-	-	-	-	-
mp-1106215	Pb	Ti	O	0.666667	0.333333	0.333333	0	1.08767	1.04242	-	-	-	-	-	-
mp-756050	Cu	Ta	O	0.166667	0.333333	0.5	0	0.870744	1.02796	-	-	-	-	-	-
mp-1187189	Ag	Ta	O	0	1	0	0	0	0.999909	-	-	-	-	-	-
mp-1303831	Mg	Fe	O	0	0	1	0	0.316286	1.01123	0	0	1	0	1.03037	1.03746
mp-763149	Li	Mn	F	0	1	0	0	0.0189118	1.03888	0	1	0	0	1.23196	1.08352
mp-1078634	La	Fe	O	0	1	0	0	7.37642e-05	1.00123	-	-	-	-	-	-
mp-567855	Rb	Ge	I	0.333333	0	0.666667	0	0.329714	1.00904	-	-	-	-	-	-
mp-781082	Sr	Cr	O	0	0.571429	0	0.428571	0.39591	1.00888	-	-	-	-	-	-
mp-18732	Ti	Ni	O	0	0	1	0	0.664639	1.0161	0	0	1	0	0.971539	1.03147
mp-18946	B	V	O	0	1	0	0	1.93391e-14	1.00135	-	-	-	-	-	-
icsd-36938	Ti	Co	O	0	0	1	0	0.861325	1.02575	0	0	1	0	0.930351	1.03027
mp-1178219	Hf	Ni	O	0	1	0	0	1.71517e-14	1.01212	-	-	-	-	-	-
mp-1106201	Ge	Mn	O	0.333333	0	0.666667	0	0.276859	1.01183	-	-	-	-	-	-
mp-556892	Bi	In	O	0	1	0	0	0.585173	1.01758	-	-	-	-	-	-
mp-753856	Fe	Hf	O	0	1	0	0	6.58644e-16	1.0042	-	-	-	-	-	-
mp-755568	Bi	Ga	O	0	1	0	0	0.679756	1.01497	-	-	-	-	-	-
mp-19424	Ti	Co	O	0	0	1	0	0.867414	1.02594	0	0	1	0	0.894143	1.02841
mp-1101720	Pb	Sn	O	0	1	0	0	0.27112	1.00397	-	-	-	-	-	-
mp-550220	Ge	Co	O	0.333333	0	0.666667	0	0.225467	1.01044	-	-	-	-	-	-
icsd-171384	Bi	Sc	O	0	1	0	0	0.319535	1.01455	-	-	-	-	-	-
mp-850194	Ti	Ni	O	0	1	0	0	0.684645	1.01913	0	1	0	0	0.988046	1.02911
mp-30058	Tl	Sb	O	0	0	1	0	0.00945147	1.01476	-	-	-	-	-	-
mp-555769	Bi	Sc	O	0	1	0	0	0.317883	1.01442	-	-	-	-	-	-
mp-540839	Cs	Pb	I	0.333333	0	0.666667	0	0.253216	1.00365	-	-	-	-	-	-
mp-777413	Ce	Sc	O	0	1	0	0	1.39314e-14	1.00079	-	-	-	-	-	-
mp-22668	Y	Co	O	0	1	0	0	9.88332e-08	1.00109	-	-	-	-	-	-
mp-768221	Y	Bi	O	0	1	0	0	0.863284	1.05079	0	1	0	0	0.976363	1.03527
mp-555313	Bi	Sc	O	0	1	0	0	0.351962	1.01494	-	-	-	-	-	-
mp-557787	Tl	Sb	O	0	0	1	0	3.34385e-14	1.01498	-	-	-	-	-	-
icsd-28909	Y	Cr	O	0	1	0	0	0	0.99965	-	-	-	-	-	-
mp-23517	Rb	Pb	I	0.333333	0	0.666667	0	0.275794	1.00544	-	-	-	-	-	-
mp-754009	Bi	Sc	O	0	1	0	0	0.783076	1.02032	0	1	0	0	1.10655	1.08044
mp-1211504	K	Pb	I	0.333333	0	0.666667	0	0.505936	1.01604	-	-	-	-	-	-
mp-559975	Sr	Mn	O	0	0.5	0	0.5	0.356822	1.0077	-	-	-	-	-	-
icsd-243696	Si	Fe	O	0.333333	0	0.666667	0	0.721247	1.02635	-	-	-	-	-	-
mp-21216	Al	Fe	O	0.333333	0.5	0.5	0	0.943836	1.03198	-	-	-	-	-	-
mp-675524	Cs	Pb	Cl	0	1	0	0	0.0144579	1.00005	-	-	-	-	-	-
mp-690546	Ti	Ni	O	0.0555556	0.333333	0.666667	0	0.715322	1.01939	0.0555556	0.333333	0.666667	0	0.896427	1.02664
mp-761574	Co	Sn	O	0	0	1	0	0.777154	1.02357	0	0	1	0	1.0074	1.03469
mp-28912	In	Mn	Br	0.333333	0	0.666667	0	0.253617	1.0046	-	-	-	-	-	-
mp-1539667	Cs	Pb	Cl	0	1	0	0	0.00771039	0.999946	-	-	-	-	-	-
mp-1278986	B	Mn	O	0	1	0	0	6.6144e-05	1.00828	-	-	-	-	-	-
mp-1105094	Tl	Hg	Cl	0.333333	0	0.666667	0	0.388711	1.02071	-	-	-	-	-	-
mp-998778	Rb	Sn	Br	0.333333	0	0.666667	0	0.257918	1.00512	-	-	-	-	-	-
mp-998535	In	Pb	Cl	0	1	0	0	0.476629	1.01005	-	-	-	-	-	-
mp-19281	La	Cr	O	0	1	0	0	8.05919e-16	1.00021	-	-	-	-	-	-
mp-19357	La	Cr	O	0	1	0	0	1.3341e-15	1.00124	-	-	-	-	-	-
mp-770618	Mg	Mn	O	0	0	1	0	0.388978	1.01164	0	0	1	0	1.04041	1.03769
icsd-19259	Mg	Mn	O	0	0	1	0	0.390029	1.0119	0	0	1	0	1.04061	1.03743
mp-774250	Mn	Al	O	0	0	1	0	0.649224	1.01949	0	0	1	0	0.781752	1.03501
mp-754152	Y	Bi	O	0	0	1	0	0.89612	1.04797	0	0	1	0	1.00772	1.05031
mp-753790	Hf	Fe	O	0	1	0	0	7.4427e-16	1.05571	-	-	-	-	-	-
mp-20460	Se	Ni	O	0	1	0	0	4.11435e-16	1.00584	-	-	-	-	-	-
mp-22136	Ge	Co	O	0.333333	0	0.666667	0	0.217764	1.01028	-	-	-	-	-	-
icsd-243692	Si	Fe	O	0.333333	0	0.666667	0	0.0866177	1.01418	-	-	-	-	-	-
mp-531689	Ti	Ni	O	0.0833333	0.138889	0.833333	0.0833333	0.701143	1.01844	0.0833333	0.111111	0.833333	0.0833333	0.929664	1.02908
mp-1178577	Fe	Al	O	0	0	1	0	0.0443478	1.00442	0	0	1	0	0.989665	1.0323
mp-29483	In	Mg	Br	0.333333	0	0.666667	0	0.229931	1.00498	-	-	-	-	-	-
mp-754654	Sn	Ni	O	0	0	1	0	0.782454	1.02346	0	0	1	0	0.830285	1.02574
mp-18841	La	Cr	O	0	1	0	0	0	0.999555	-	-	-	-	-	-
mp-675030	Ti	Ni	O	0.0833333	0.25	0.75	0	0.734357	1.02019	0.0833333	0.25	0.75	0	0.886466	1.02667
mp-698587	Ti	Ni	O	0.1	0.166667	0.8	0.1	0.705021	1.01868	0.1	0.133333	0.8	0.1	0.925122	1.02881
mp-1206105	In	Ca	I	0	0.333333	0.666667	0	2.61565e-16	1.0039	-	-	-	-	-	-
mp-755003	La	Bi	O	0	0	1	0	0.679322	1.05174	0	0	1	0	1.28467	1.07229
icsd-28931	Ce	Cr	O	0	1	0	0	0	1.00012	-	-	-	-	-	-
mp-1178547	Al	Rh	O	0	0	1	0	5.64674e-16	1.02408	-	-	-	-	-	-
mp-645159	Bi	Fe	O	0	1	0	0	4.93507e-16	1.00071	-	-	-	-	-	-
mp-769734	Sc	Fe	O	0	1	0	0	1.36212e-06	1.00357	-	-	-	-	-	-
mp-4682	Se	Zn	O	0	1	0	0	2.93442e-16	1.01321	-	-	-	-	-	-
mp-768310	La	Bi	O	0	1	0	0	0.595984	1.03349	0	1	0	0	1.46057	1.08899
mp-1273989	La	Co	O	0	1	0	0	0.000204879	1.00287	-	-	-	-	-	-
icsd-241833	In	Fe	O	0	1	0	0	0.796001	1.01945	0	1	0	0	1.134	1.05293
mp-868005	Ga	Fe	O	0.26087	0.478261	0.565217	0	0.846329	1.03	-	-	-	-	-	-
mp-776154	Fe	Al	O	0	1	0	0	7.15583e-06	1.00395	-	-	-	-	-	-
mp-754980	Mn	Zr	O	0	0	1	0	0.895514	1.03101	0	0	1	0	0.99805	1.03443
mp-23443	Tl	Mn	I	0.333333	0	0.666667	0	0.240691	1.00362	-	-	-	-	-	-
mp-19113	Te	Co	O	0	1	0	0	9.28339e-16	1.01153	-	-	-	-	-	-
mp-1099572	In	Mn	F	0	1	0	0	0.485875	1.00804	-	-	-	-	-	-
mp-998744	Tl	Ge	Cl	0	1	0	0	0.931779	1.03472	-	-	-	-	-	-
mp-754513	Mn	Zr	O	0	1	0	0	0.711306	1.01627	0	1	0	0	1.22687	1.0549
mp-9186	Se	Cd	O	0	1	0	0	3.98242e-16	1.00701	-	-	-	-	-	-
mp-849271	I	Ag	O	0	1	0	0	4.15321e-14	1.06209	-	-	-	-	-	-
mp-998603	Rb	Pb	Br	0	0.333333	0.666667	0	0.0015927	1.00315	-	-	-	-	-	-
icsd-124801	Y	Cr	O	0	1	0	0	1.20096e-15	1.00104	-	-	-	-	-	-
mp-1199904	B	Fe	O	0.2	0.2	0.8	0	0.734642	1.02971	-	-	-	-	-	-
mp-18725	Y	Cr	O	0	1	0	0	1.88339e-14	1.00108	-	-	-	-	-	-
mp-20798	Mn	Ge	O	0	0	1	0	0.435804	1.01574	0	0	1	0	1.16668	1.05115
mp-1193035	Bi	Fe	O	0	1	0	0	0.535698	1.01996	-	-	-	-	-	-
mp-998241	In	Mn	F	0	1	0	0	0.492331	1.00854	-	-	-	-	-	-
mp-22989	I	Na	O	0	1	0	0	5.5938e-16	1.01102	-	-	-	-	-	-
icsd-192515	Bi	Fe	O	0	1	0	0	0.790707	1.01953	-	-	-	-	-	-
mp-28558	Rb	Ge	Br	0	1	0	0	0.856694	1.02441	-	-	-	-	-	-
mp-22955	I	Li	O	0	0	0	1	0.252888	1.00665	-	-	-	-	-	-
mp-572987	Se	Ni	O	0.166667	0.416667	0.583333	0	0.281159	1.02523	-	-	-	-	-	-
icsd-142855	B	Fe	O	0	1	0	0	1.974e-16	1.00075	-	-	-	-	-	-
mp-27252	Tl	Cd	I	0.333333	0	0.666667	0	0.21976	1.00778	-	-	-	-	-	-
mp-22988	Cs	Ge	Cl	0	1	0	0	0.698584	1.01811	-	-	-	-	-	-
mp-754140	Se	Ca	O	0	1	0	0	1.92462e-14	1.00276	-	-	-	-	-	-
mp-28534	In	Ca	Br	0	0.333333	0.666667	0	4.68703e-16	1.00548	-	-	-	-	-	-
mp-19097	B	Fe	O	0	1	0	0	4.45722e-16	1.00124	-	-	-	-	-	-
mp-12271	Se	Mg	O	0	1	0	0	1.59814e-16	1.0041	-	-	-	-	-	-
mp-18634	S	Cd	O	0	0.333333	0.666667	0	0.431853	1.04009	-	-	-	-	-	-
icsd-133659	C	Ni	O	0	1	0	0	7.48818e-16	1.00028	-	-	-	-	-	-
mp-18961	Sc	Cr	O	0	1	0	0	3.04356e-05	1.00291	-	-	-	-	-	-
mp-1178576	Co	Al	O	0	0	1	0	0.83064	1.02411	0	0	1	0	0.460529	1.01019
mp-19299	B	Cr	O	0	1	0	0	4.63851e-16	1.00107	-	-	-	-	-	-
mp-22616	Se	Co	O	0	1	0	0	6.36499e-16	1.00623	-	-	-	-	-	-
mp-1271783	C	Mn	O	0	0.333333	0.666667	0	0.590662	1.06774	-	-	-	-	-	-
mp-504821	Tl	Fe	Br	0.333333	0	0.666667	0	0.232758	1.00733	-	-	-	-	-	-
mp-1206188	Tl	Ca	I	0	0.333333	0.666667	0	3.48936e-16	1.00291	-	-	-	-	-	-
mp-753534	Co	Hf	O	0	1	0	0	4.33056e-05	1.00543	-	-	-	-	-	-
mp-19147	C	Ni	O	0	1	0	0	4.57928e-16	1.00036	-	-	-	-	-	-
icsd-22286	Rb	Pb	Br	0.333333	0	0.666667	0	0.339328	1.00426	-	-	-	-	-	-
mp-505222	In	Cd	Br	0.333333	0	0.666667	0	0.19723	1.0057	-	-	-	-	-	-
mp-567681	Cs	Pb	Br	0.333333	0	0.666667	0	0.294012	1.00383	-	-	-	-	-	-
mp-756665	Zr	Co	O	0	1	0	0	1.02652e-05	1.02051	-	-	-	-	-	-
mp-775761	Cl	Ag	O	0	1	0	0	0.0919958	1.02184	-	-	-	-	-	-
mp-560522	S	Mn	O	0	0.333333	0.666667	0	0.401937	1.03711	-	-	-	-	-	-
mp-1078458	Fe	Cr	O	0	0	1	0	0.523779	1.01234	0	0	1	0	0.946539	1.03006
mp-761293	Zr	Co	O	0	0	1	0	0.755689	1.02214	0	0	1	0	0.981421	1.03461
mp-998567	In	Sn	Cl	0	0	1	0	0.237932	1.03829	0	0	1	0	1.12065	1.05973
mp-998555	In	Sn	Br	0	1	0	0	0.0171488	1.00953	0	1	0	0	1.2722	1.08843
mp-998604	Rb	Pb	Cl	0	0.333333	0.666667	0	0.00142934	1.00392	-	-	-	-	-	-
mp-570300	Tl	Mn	Cl	0.333333	0	0.666667	0	0.308085	1.00854	-	-	-	-	-	-
icsd-132285	Tl	Mg	Cl	0	0.666667	0	0.333333	0.0989992	1.00291	-	-	-	-	-	-
mp-998231	K	Ge	Cl	0	1	0	0	0.891522	1.03118	-	-	-	-	-	-
mp-1422819	In	Mn	F	0	1	0	0	0.453123	1.00701	-	-	-	-	-	-
mp-28218	Tl	Cd	Cl	0.333333	0	0.666667	0	0.318779	1.00895	-	-	-	-	-	-
mp-5811	Cs	Pb	F	0	1	0	0	0	1.00012	-	-	-	-	-	-
mp-21043	Rb	Pb	F	0	1	0	0	0	1.00034	-	-	-	-	-	-
mp-769397	S	Mg	O	0	0.333333	0.666667	0	0.364445	1.0371	-	-	-	-	-	-
mp-998325	Rb	Ca	I	0	1	0	0	0.0187008	1.00008	-	-	-	-	-	-
mp-1205521	Tl	Ca	Br	0	0.333333	0.666667	0	8.74654e-16	1.00435	-	-	-	-	-	-
mp-1080232	Cs	Sr	I	0	0.333333	0.666667	0	4.03229e-16	1.00313	-	-	-	-	-	-
mp-998230	Sn	Li	Cl	0	1	0	0	0.588046	1.01286	-	-	-	-	-	-
mp-29751	Cs	Mg	I	0	0	0	1	3.7827e-16	1.00199	-	-	-	-	-	-
mp-998417	Cs	Sr	I	0	1	0	0	0.150533	1.00095	-	-	-	-	-	-
mp-28219	Tl	Cd	Br	0.333333	0	0.666667	0	0.257079	1.00694	-	-	-	-	-	-
mp-1205548	K	Sr	I	0	0.333333	0.666667	0	4.04011e-16	1.00224	-	-	-	-	-	-
mp-1205862	Rb	Sr	I	0	0.333333	0.666667	0	6.20372e-16	1.00296	-	-	-	-	-	-
mp-19843	Ce	Al	O	0	1	0	0	7.42119e-06	1.00022	-	-	-	-	-	-
mp-562826	Se	Co	O	0.166667	0.416667	0.583333	0	0.35716	1.02878	-	-	-	-	-	-
mp-23339	Br	Na	O	0	1	0	0	0.148042	1.02839	-	-	-	-	-	-
mp-998428	Cs	Ca	I	0.333333	0	0.666667	0	0.250018	1.0064	-	-	-	-	-	-
mp-1210617	Tl	Mg	Cl	0	1	0	0	5.95669e-16	0.999872	-	-	-	-	-	-
mp-998787	Tl	Ca	Cl	0	0.333333	0.666667	0	3.58587e-16	1.00545	-	-	-	-	-	-
mp-998592	Rb	Ca	I	0.333333	0	0.666667	0	0.257467	1.0058	-	-	-	-	-	-
mp-1205722	K	Ca	I	0	0.333333	0.666667	0	3.8856e-16	1.00247	-	-	-	-	-	-
mp-570231	Cs	Cd	Br	0	1	0	0	0	0.999907	-	-	-	-	-	-
mp-540609	Cs	Mn	I	0	0	0	1	5.65757e-16	1.00148	-	-	-	-	-	-
mp-998333	Cs	Ca	I	0	1	0	0	0.00309962	0.999872	-	-	-	-	-	-
mp-754657	Mn	Hf	O	0	1	0	0	9.31173e-16	1.00288	-	-	-	-	-	-
icsd-145788	La	Fe	O	0	1	0	0	4.24325e-06	1.00165	-	-	-	-	-	-
mp-23330	Cl	Na	O	0	1	0	0	0.0431538	1.02161	-	-	-	-	-	-
mp-1213688	Cs	Ca	I	0	1	0	0	1.90949e-14	1.00086	-	-	-	-	-	-
mp-2720358	Cl	Na	O	0	1	0	0	0.0593807	1.02141	-	-	-	-	-	-
mp-998151	Tl	Ca	Cl	0	1	0	0	0.247136	1.0028	-	-	-	-	-	-
mp-1197432	Cs	Hg	Cl	0	1	0	0	0.338571	1.02404	-	-	-	-	-	-
mp-998739	Tl	Mg	F	0	1	0	0	0.000297512	0.999789	-	-	-	-	-	-
mp-998591	Sn	Li	Cl	0	1	0	0	0.652123	1.0129	0	1	0	0	0.478586	1.04214
mp-1209227	Rb	Ca	Br	0	1	0	0	0	0.999944	-	-	-	-	-	-
mp-998749	K	Ca	Br	0	1	0	0	0.170073	1.00123	-	-	-	-	-	-
mp-998198	Rb	Ca	Br	0	1	0	0	0.0282129	1.00018	-	-	-	-	-	-
mp-30056	Cs	Ca	Br	0	1	0	0	0	1.00015	-	-	-	-	-	-
mp-998745	Tl	Zn	F	0	1	0	0	0.00610423	0.999895	-	-	-	-	-	-
mp-998297	Cs	Sr	Br	0	1	0	0	0.0315147	1.00024	-	-	-	-	-	-
mp-1209238	Rb	Ca	Br	0	1	0	0	5.30258e-16	0.99999	-	-	-	-	-	-
mp-22224	Se	Mn	O	0	1	0	0	4.91327e-16	1.00824	-	-	-	-	-	-
mp-1211648	K	Ca	Br	0	1	0	0	3.28742e-14	1.00026	-	-	-	-	-	-
mp-28532	In	Cr	Br	0.333333	0	0.666667	0	0.208537	1.02277	-	-	-	-	-	-
mp-998536	Rb	Ca	Br	0.333333	0	0.666667	0	0.31875	1.00897	-	-	-	-	-	-
mp-1412222	Tl	Cd	F	0	1	0	0	0.543654	1.01061	-	-	-	-	-	-
mp-1213104	Cs	Sr	Br	0	1	0	0	1.97274e-14	1.00028	-	-	-	-	-	-
mp-541899	Cs	Cd	Br	0	0	0	1	3.01517e-16	1.0014	-	-	-	-	-	-
mp-998611	Rb	Sn	Cl	0	1	0	0	0.0084313	1.00839	-	-	-	-	-	-
mp-998599	K	Ca	Br	0	0.333333	0.666667	0	1.02933e-15	1.00326	-	-	-	-	-	-
mp-998433	Cs	Sr	Br	0	0.333333	0.666667	0	0.0010676	1.0019	-	-	-	-	-	-
mp-22590	La	Fe	O	0	1	0	0	4.56594e-16	1.00006	-	-	-	-	-	-
mp-30528	Tl	Mn	Cl	0	1	0	0	9.67203e-14	1.00017	-	-	-	-	-	-
mp-1097061	Tl	Ca	F	0	1	0	0	0.392203	1.00594	-	-	-	-	-	-
mp-998623	Tl	Cd	F	0	1	0	0	0.53422	1.01065	-	-	-	-	-	-
mp-27442	Rb	Cr	I	0	0	0	1	0.0620742	1.01355	-	-	-	-	-	-
mp-27400	Rb	Cd	Br	0.333333	0	0.666667	0	0.290621	1.00966	-	-	-	-	-	-
icsd-2525	Cs	Mn	Cl	0	0.333333	0	0.666667	0.172759	1.00433	-	-	-	-	-	-
mp-998615	Tl	Ca	F	0	1	0	0	0.321925	1.00394	-	-	-	-	-	-
mp-859873	Li	Mn	F	0	0	0	1	7.16192e-16	1.0373	-	-	-	-	-	-
mp-29750	Cs	Mg	Br	0	0	0	1	2.06848e-14	1.00404	-	-	-	-	-	-
icsd-434329	Tl	Mn	F	0	1	0	0	0	0.999869	-	-	-	-	-	-
mp-580597	Cs	Cr	I	0	0	0	1	2.52853e-16	1.00922	-	-	-	-	-	-
icsd-35225	Tl	Fe	Br	0	0	0	1	0.142801	1.00365	-	-	-	-	-	-
mp-20282	Cs	Pb	F	0	1	0	0	0.177752	1.00341	-	-	-	-	-	-
mp-998759	Tl	Cd	F	0	1	0	0	0.0398901	1.0018	-	-	-	-	-	-
mp-998761	Tl	Ni	F	0	1	0	0	0	1.00016	-	-	-	-	-	-
mp-998601	K	Ca	Cl	0	1	0	0	0.175872	1.00134	-	-	-	-	-	-
mp-29636	K	Mn	Br	0.333333	0	0.666667	0	0.283461	1.00727	-	-	-	-	-	-
mp-1209047	Rb	Sr	Cl	0	1	0	0	0	0.999907	-	-	-	-	-	-
mp-1211589	K	Ca	Cl	0	1	0	0	0	0.999836	-	-	-	-	-	-
mp-1213642	Cs	Sr	Cl	0	1	0	0	0	1.00004	-	-	-	-	-	-
mp-1080233	Cs	Sr	Cl	0	1	0	0	0.0410757	1.0002	-	-	-	-	-	-
mp-998755	Rb	Sr	Cl	0	0	1	0	0.427004	1.02105	0	0	1	0	1.02493	1.04374
mp-998421	K	Ca	Cl	0	0	1	0	0.32999	1.01692	0	0	1	0	0.980011	1.04107
mp-674508	Rb	Pb	F	0	1	0	0	0.36482	1.01063	-	-	-	-	-	-
mp-1213645	Cs	Sr	Cl	0	1	0	0	0	0.999987	-	-	-	-	-	-
mp-29763	Rb	Mn	Br	0	0	0	1	6.86026e-16	1.00232	-	-	-	-	-	-
mp-998324	Rb	Ca	Cl	0	1	0	0	0.0225022	1.00087	-	-	-	-	-	-
mp-1209111	Rb	Sr	Cl	0	1	0	0	0	1.00007	-	-	-	-	-	-
mp-22991	Cs	V	I	0	0	0	1	4.83711e-16	1.00217	-	-	-	-	-	-
mp-1206863	Cs	Ca	Cl	0	1	0	0	3.77806e-16	1.00012	-	-	-	-	-	-
mp-998561	Cs	Sr	Cl	0	1	0	0	0.099248	1.00123	-	-	-	-	-	-
mp-1540546	Rb	Pb	F	0	1	0	0	0.3693	1.01078	-	-	-	-	-	-
mp-998762	Tl	Mn	F	0	1	0	0	0.0209081	1	-	-	-	-	-	-
icsd-138546	Rb	Ca	Cl	0	1	0	0	3.16854e-16	0.999917	-	-	-	-	-	-
mp-1097916	Cs	Ca	Cl	0	1	0	0	0	1.00017	-	-	-	-	-	-
mp-1096927	Cs	Ca	Cl	0	1	0	0	0.00513234	0.999874	-	-	-	-	-	-
mp-1211643	K	Ca	Cl	0	1	0	0	7.72771e-16	1.0003	-	-	-	-	-	-
mp-1176635	Mn	Li	F	0	0.333333	0.666667	0	6.44247e-16	1.00622	-	-	-	-	-	-
icsd-138559	Rb	Sr	Cl	0	1	0	0	5.10313e-16	1.00072	-	-	-	-	-	-
mp-1209174	Rb	Sr	Cl	0	1	0	0	6.16965e-16	1.00093	-	-	-	-	-	-
mp-1213084	Cs	Sr	Cl	0	1	0	0	4.25931e-16	1.00039	-	-	-	-	-	-
mp-1078473	C	Mn	O	0	0.333333	0.666667	0	0.623346	1.07223	-	-	-	-	-	-
mp-568544	Cs	Cd	Cl	0	1	0	0	0	1.00011	-	-	-	-	-	-
mp-672346	Rb	V	I	0	0	0	1	0.0241968	1.00479	-	-	-	-	-	-
mp-23048	Cs	Mn	Br	0	0	0	1	5.62539e-16	1.00271	-	-	-	-	-	-
mp-570290	Tl	Mn	Cl	0	1	0	0	0	1.00022	-	-	-	-	-	-
mp-23004	Cs	Mg	Cl	0	0	0	1	2.64759e-16	1.00599	-	-	-	-	-	-
mp-619015	Cs	Cd	Cl	0	0.666667	0	0.333333	0.157519	1.00212	-	-	-	-	-	-
mp-1206817	Tl	V	Cl	0	0	0	1	1.98876e-14	1.00549	-	-	-	-	-	-
mp-23390	Rb	Cd	Cl	0.333333	0	0.666667	0	0.331181	1.01165	-	-	-	-	-	-
mp-676553	Rb	Cr	I	0	0	0	1	3.40628e-14	1.00959	-	-	-	-	-	-
mp-23442	K	Cd	Cl	0.333333	0	0.666667	0	0.347979	1.01057	-	-	-	-	-	-
mp-27208	Rb	Mg	Cl	0	0.5	0	0.5	0.1961	1.00286	-	-	-	-	-	-
mp-1176631	Li	Mn	F	0	0.333333	0.666667	0	3.81313e-16	1.01587	-	-	-	-	-	-
mp-23336	Cs	Mn	Cl	0	0.333333	0	0.666667	0.144813	1.0022	-	-	-	-	-	-
mp-662499	Rb	Mg	Cl	0	0.666667	0	0.333333	0.151752	1.0022	-	-	-	-	-	-
mp-27865	K	Mg	Cl	0	1	0	0	2.63019e-16	1.00014	-	-	-	-	-	-
mp-1205652	Tl	Ni	Cl	0	0	0	1	4.03613e-16	1.00401	-	-	-	-	-	-
mp-777298	Li	Mn	F	0.333333	0	0.666667	0	0.466101	1.04943	-	-	-	-	-	-
mp-1180767	K	Cr	F	0	1	0	0	0.706456	1.01922	-	-	-	-	-	-
mp-753024	Li	V	F	0	0	0	1	2.93338e-16	1.04137	-	-	-	-	-	-
mp-777894	Li	V	F	0	0.333333	0.666667	0	0.269103	1.01166	0	0	0	1	1.35132	1.05887
mp-20572	Na	V	F	0	1	0	0	0	0.999647	-	-	-	-	-	-
mp-23348	K	Fe	Br	0.333333	0	0.666667	0	0.264836	1.00862	-	-	-	-	-	-
mp-568231	Rb	Mn	Br	0	0	0	1	0.0163628	1.0009	-	-	-	-	-	-
mp-27176	Na	Mn	Cl	0	0	1	0	0.300447	1.00887	0	0	1	0	0.848174	1.02628
mp-760095	Li	Mn	F	0	1	0	0	0.44083	1.02813	0.333333	0.166667	0.666667	0.333333	0.685731	1.02369
mp-998758	Tl	Hg	F	0	1	0	0	0.0322055	1.00544	-	-	-	-	-	-
mp-777676	Li	V	F	0.333333	0	0.666667	0	0.353387	1.03196	-	-	-	-	-	-
mp-753025	Li	Mn	F	0	0	1	0	9.42295e-14	1.00499	-	-	-	-	-	-
mp-29314	Rb	V	Br	0	0	0	1	0.0151339	1.00563	-	-	-	-	-	-
mp-567530	K	Mn	Cl	0.333333	0	0.666667	0	0.333198	1.00999	-	-	-	-	-	-
mp-568136	Rb	V	Br	0	0	0	1	0.011837	1.00581	-	-	-	-	-	-
mp-782665	Li	V	F	0.333333	0	0.666667	0	0.385595	1.03005	-	-	-	-	-	-
mp-570099	Rb	V	Br	0	0	0	1	2.47358e-16	1.00426	-	-	-	-	-	-
mp-1205604	K	V	Cl	0	0	0	1	3.16784e-16	1.00422	-	-	-	-	-	-
mp-764783	Li	Mn	F	0	1	0	0	4.80117e-16	1.03317	-	-	-	-	-	-
mp-1178549	V	Al	O	0	0	1	0	0.724504	1.02066	0	0	1	0	0.730518	1.02015
mp-758652	Zn	Co	O	0	0	1	0	0.324221	1.01036	0	0	1	0	1.27601	1.0528
mp-754608	Si	V	O	0.333333	0	0.666667	0	0.18851	1.01156	-	-	-	-	-	-
mp-1188802	Ag	Cu	F	0	1	0	0	9.25431e-16	1.01614	-	-	-	-	-	-
mp-998365	Ag	Ni	F	0	1	0	0	0	0.999894	-	-	-	-	-	-
mp-998429	Ag	Ni	F	0	0.333333	0.666667	0	7.7457e-16	1.00599	-	-	-	-	-	-
mp-569753	Tl	Co	Cl	0	0	0	1	4.86669e-16	1.0034	-	-	-	-	-	-
mp-567620	Tl	Co	Cl	0	0	0	1	0.0636971	1.00549	-	-	-	-	-	-
mp-2353285	Tl	Co	Cl	0	0	0	1	8.95275e-16	1.00392	-	-	-	-	-	-
mp-504708	Cs	Co	Cl	0	0	0	1	5.88837e-16	1.00256	-	-	-	-	-	-
mp-29616	Cs	Cr	Cl	0	0	0	1	3.01226e-16	1.01123	-	-	-	-	-	-
mp-23032	Cs	Cu	Cl	0	0	0	1	0.241177	1.03205	-	-	-	-	-	-
mp-2456411	Cs	Cu	Cl	0	0	0	1	0.00234164	1.03384	-	-	-	-	-	-
mp-29400	Cs	Fe	Cl	0	0	0	1	6.00826e-16	1.00061	-	-	-	-	-	-
mp-558702	Cs	Mn	F	0	0.666667	0	0.333333	0.363203	1.01039	-	-	-	-	-	-
mp-22950	Cs	Ni	Cl	0	0	0	1	3.56689e-16	1.00484	-	-	-	-	-	-
mp-1080570	Cs	Ni	Br	0	0	0	1	5.22898e-16	1.00305	-	-	-	-	-	-
mp-611601	Cs	Ni	F	0	0	0	1	2.55633e-14	1.01473	-	-	-	-	-	-
mp-1194078	Cs	Ni	F	0	0.666667	0	0.333333	0.290844	1.01002	-	-	-	-	-	-
mp-557772	Cs	Ni	F	0	0	0	1	6.33656e-16	1.01363	-	-	-	-	-	-
mp-505492	Cs	Ni	F	0	0.333333	0	0.666667	0.332214	1.01416	-	-	-	-	-	-
mp-22977	Cs	V	Cl	0	0	0	1	4.05376e-16	1.00448	-	-	-	-	-	-
mp-23038	Cs	V	Br	0	0	0	1	3.67783e-16	1.00423	-	-	-	-	-	-
mp-998710	Tl	Hg	F	0	1	0	0	0.805725	1.02351	-	-	-	-	-	-
mp-1001793	K	Co	Cl	0	1	0	0	0.00842278	1.00043	-	-	-	-	-	-
mp-1180782	K	Cr	F	0	1	0	0	0.394929	1.0098	-	-	-	-	-	-
mp-556365	K	Cr	F	0	1	0	0	6.87086e-16	1.00834	-	-	-	-	-	-
mp-560547	K	Cr	F	0	1	0	0	3.95738e-06	1.0083	-	-	-	-	-	-
mp-566131	K	Cr	F	0	1	0	0	0	1.0062	-	-	-	-	-	-
mp-3682	K	Cu	F	0	1	0	0	7.26048e-16	1.01028	-	-	-	-	-	-
mp-5566	K	Cu	F	0	1	0	0	0	1.00989	-	-	-	-	-	-
mp-669347	K	Cu	F	0	1	0	0	6.79524e-16	1.0163	-	-	-	-	-	-
mp-1080828	K	Cu	F	0	1	0	0	1.5378e-16	1.00974	-	-	-	-	-	-
mp-23538	K	Fe	Cl	0.333333	0	0.666667	0	0.306558	1.01155	-	-	-	-	-	-
mp-23049	K	Mn	Cl	0	1	0	0	3.71945e-16	1.00014	-	-	-	-	-	-
mp-1180807	K	Mn	F	0	1	0	0	0.0122661	1.03621	-	-	-	-	-	-
mp-558046	K	Mn	F	0	1	0	0	1.02445e-14	1	-	-	-	-	-	-
mp-555123	K	Mn	F	0	1	0	0	0	0.999614	-	-	-	-	-	-
mp-555359	K	Mn	F	0	1	0	0	2.85239e-16	1.00021	-	-	-	-	-	-
mp-560382	K	Mn	F	0	1	0	0	2.2214e-16	0.999948	-	-	-	-	-	-
mp-1205353	K	Mn	F	0	1	0	0	1.9956e-14	1.00015	-	-	-	-	-	-
mp-1180746	K	Mn	F	0	1	0	0	0.350896	1.01032	-	-	-	-	-	-
mp-644332	K	Mn	F	0	1	0	0	7.08872e-16	1.00001	-	-	-	-	-	-
mp-27366	K	Ni	Cl	0	0	0	1	0.0357556	1.00564	-	-	-	-	-	-
mp-560976	K	Ni	F	0	1	0	0	0	0.999525	-	-	-	-	-	-
mp-557257	K	V	F	0	1	0	0	0	1.00043	-	-	-	-	-	-
mp-757915	Li	Ag	F	0	0	1	0	0.506673	1.04445	0	0	1	0	1.05454	1.04531
mp-760151	Li	Ag	F	0	1	0	0	0.0748534	1.02149	0	0	0	1	0.354793	1.01042
mp-756821	Ag	Li	F	0	1	0	0	3.27563e-14	1.01067	-	-	-	-	-	-
mp-752605	Li	Ag	F	0.333333	0	0.666667	0	0.371748	1.04718	-	-	-	-	-	-
mp-759500	Co	Li	F	0.333333	0.333333	0.666667	0.333333	0.65818	1.03257	-	-	-	-	-	-
mp-760814	Li	Cu	F	0	0.666667	0.333333	0	0.367199	1.02033	-	-	-	-	-	-
mp-761262	Li	Cu	F	0	0.666667	0.333333	0	0.276357	1.03033	-	-	-	-	-	-
mp-761897	Li	Cu	F	0	1	0	0	0.0187469	1.01813	0	0	0	1	0.284476	1.00675
mp-754707	Li	Fe	F	0.333333	0	0.666667	0	0.493661	1.04074	-	-	-	-	-	-
mp-777888	Li	Fe	F	0	1	0	0	0.0518895	1.04137	0	1	0	0	1.11099	1.07858
mp-755103	Li	Fe	F	0.166667	0.333333	0.5	0	0.593819	1.02695	-	-	-	-	-	-
mp-776077	Li	Fe	F	0.333333	0	0.666667	0	0.545321	1.03269	-	-	-	-	-	-
mp-780803	Li	Fe	F	0.333333	0	0.666667	0	0.544163	1.03417	-	-	-	-	-	-
mp-1176705	Li	Fe	F	0	0.333333	0.666667	0	6.6482e-16	1.02528	-	-	-	-	-	-
mp-1176706	Li	Fe	F	0	0.333333	0.666667	0	3.16403e-16	1.02382	-	-	-	-	-	-
mp-755575	Li	Fe	F	0.333333	0	0.666667	0	0.275802	1.01177	-	-	-	-	-	-
mp-754581	Li	Fe	F	0.333333	0	0.666667	0	0.460904	1.01228	-	-	-	-	-	-
mp-754816	Li	Fe	F	0	1	0	0	5.54506e-16	1.01067	-	-	-	-	-	-
mp-761166	Li	Fe	F	0	1	0	0	0.508451	1.01194	0	1	0	0	1.27392	1.05062
mp-755136	Fe	Li	F	0	0.333333	0.666667	0	2.65129e-16	1.00808	-	-	-	-	-	-
mp-1176709	Li	Fe	F	0	1	0	0	0.0274679	1.03657	0	1	0	0	1.05404	1.07118
mp-777622	Li	Fe	F	0	0	1	0	0.108062	1.00798	-	-	-	-	-	-
mp-777899	Li	Fe	F	0	0.333333	0.666667	0	0.373579	1.03667	-	-	-	-	-	-
mp-756113	Li	Fe	F	0.333333	0	0.666667	0	0.560637	1.01967	-	-	-	-	-	-
mp-776080	Li	Fe	F	0	0.666667	0.333333	0	0.244068	1.01106	0	0	0	1	0.930619	1.03324
mp-776017	Li	Fe	F	0.333333	0	0.666667	0	0.460669	1.04729	-	-	-	-	-	-
mp-1176698	Li	Fe	F	0	1	0	0	0.00460834	1.0024	0	0	0	1	0.128415	1.00234
mp-780639	Li	Fe	F	0	0.333333	0.666667	0	6.38899e-14	1.02069	-	-	-	-	-	-
mp-777522	Li	Fe	F	0.333333	0.333333	0.666667	0	0.10061	1.0092	-	-	-	-	-	-
mp-756109	Fe	Li	F	0	1	0	0	3.19842e-16	1.01517	-	-	-	-	-	-
mp-777672	Li	Fe	F	0	0.333333	0.666667	0	0.29732	1.02184	-	-	-	-	-	-
mp-776156	Mn	Li	F	0	1	0	0	0.00616847	1.04097	0	1	0	0	0.569095	1.05632
mp-777972	Li	Mn	F	0.333333	0.5	0.5	0	0.581436	1.01582	-	-	-	-	-	-
mp-754676	Li	Mn	F	0	1	0	0	8.30596e-06	1.00334	0	0	0	1	4.87587e-16	1.00195
mp-765457	Li	Mn	F	0	1	0	0	5.44989e-14	1.01154	-	-	-	-	-	-
mp-777352	Li	Mn	F	0.333333	0	0.666667	0	0.558688	1.03625	-	-	-	-	-	-
mp-778819	Li	Mn	F	0	0.333333	0.666667	0	0.00539383	1.01664	-	-	-	-	-	-
mp-1176636	Li	Mn	F	0	0.333333	0.666667	0	5.32673e-16	1.0171	-	-	-	-	-	-
mp-1176632	Li	Mn	F	0	1	0	0	3.92559e-16	1.00917	-	-	-	-	-	-
mp-752938	Li	Mn	F	0	1	0	0	9.21617e-16	1.0003	-	-	-	-	-	-
mp-752829	Li	Mn	F	0	0	1	0	0.821324	1.02468	0	0	1	0	0.952542	1.03101
mp-776951	Mn	Li	F	0	1	0	0	8.33262e-16	1.00597	-	-	-	-	-	-
mp-1176630	Li	Mn	F	0.333333	0	0.666667	0	0.631011	1.02983	-	-	-	-	-	-
mp-778697	Mn	Li	F	0	0.666667	0.333333	0	0.370084	1.01397	-	-	-	-	-	-
mp-759093	Li	Mn	F	0	0.333333	0.666667	0	0.322967	1.01409	0	0	0	1	1.30636	1.05613
mp-759492	Li	Mn	F	0.333333	0	0.666667	0	0.56424	1.03373	-	-	-	-	-	-
mp-777655	Li	Mn	F	0.166667	0.333333	0.5	0	0.705847	1.03546	-	-	-	-	-	-
mp-777355	Li	Mn	F	0	0.666667	0.333333	0	0.300265	1.0134	0	0	0	1	1.04124	1.0412
mp-756130	Li	Mn	F	0	0	1	0	3.15574e-14	1.00272	-	-	-	-	-	-
mp-758501	Li	Ni	F	0	1	0	0	1.02169e-15	1.00456	0	0	1	0	1.60999	1.08651
mp-752911	Li	V	F	0	1	0	0	7.20828e-16	1.00725	-	-	-	-	-	-
mp-752607	Li	V	F	0	0	1	0	0.44254	1.00908	0	0	1	0	1.19569	1.04449
mp-778509	V	Li	F	0	1	0	0	0.0122661	1.03621	0	1	0	0	0.334731	1.0448
mp-752764	Li	V	F	0	1	0	0	0.33602	1.00517	0	1	0	0	1.52064	1.06914
mp-777551	Li	V	F	0	1	0	0	0.0247813	1.04218	0	1	0	0	1.12886	1.07815
mp-777893	Li	V	F	0	0.666667	0.333333	0	0.237199	1.01121	0	0	0	1	1.0381	1.04035
mp-1078336	Na	Co	F	0	0.333333	0.666667	0	1.07486e-14	1.00581	-	-	-	-	-	-
mp-21404	Na	Co	F	0	1	0	0	4.64799e-16	1.00099	-	-	-	-	-	-
mp-505085	Na	Cu	F	0	1	0	0	2.24271e-14	1.01152	-	-	-	-	-	-
mp-505066	Na	Fe	F	0	1	0	0	9.4732e-15	1.00186	-	-	-	-	-	-
mp-1078217	Na	Fe	F	0	0.333333	0.666667	0	2.39351e-16	1.0082	-	-	-	-	-	-
mp-560242	Na	Mn	F	0	1	0	0	4.98035e-16	1.00231	-	-	-	-	-	-
mp-561480	Na	Ni	F	0	1	0	0	1.97356e-14	1.00056	-	-	-	-	-	-
mp-1078237	Na	Ni	F	0	0.333333	0.666667	0	3.21983e-14	1.00577	-	-	-	-	-	-
mp-1120756	Na	V	F	0	1	0	0	1.87169e-06	1.00244	-	-	-	-	-	-
mp-27707	Rb	Co	Cl	0	0	0	1	2.03876e-14	1.00341	-	-	-	-	-	-
mp-1206319	Rb	Co	Br	0	0	0	1	5.38059e-16	1.00184	-	-	-	-	-	-
mp-1209578	Rb	Co	Br	0	0	0	1	0.0198114	1.00206	-	-	-	-	-	-
mp-30027	Rb	Cr	Cl	0	0	0	1	0.0761955	1.01686	-	-	-	-	-	-
mp-568864	Rb	Cr	Cl	0	0	0	1	0.0824657	1.02209	-	-	-	-	-	-
mp-568887	Rb	Cr	Cl	0	0	0	1	1.9421e-14	1.01286	-	-	-	-	-	-
mp-23055	Rb	Cu	Cl	0	0	0	1	5.84387e-16	1.03621	-	-	-	-	-	-
mp-568857	Rb	Cu	Cl	0	0	0	1	0.117692	1.03584	-	-	-	-	-	-
mp-571305	Rb	Cu	Cl	0	0	0	1	0.119182	1.03553	-	-	-	-	-	-
mp-8858	Rb	Cu	F	0	1	0	0	6.37671e-16	1.03098	-	-	-	-	-	-
mp-554601	Rb	Cu	F	0	1	0	0	0	1.00266	-	-	-	-	-	-
mp-569309	Rb	Mn	Cl	0	0.666667	0	0.333333	0.123595	1.00102	-	-	-	-	-	-
mp-558749	Rb	Mn	F	0	1	0	0	0	0.999542	-	-	-	-	-	-
mp-23486	Rb	Ni	Cl	0	0	0	1	5.3325e-16	1.0048	-	-	-	-	-	-
mp-27409	Rb	Ni	Br	0	0	0	1	4.30999e-16	1.00264	-	-	-	-	-	-
mp-556488	Rb	Ni	F	0	0.666667	0	0.333333	0.277893	1.00682	-	-	-	-	-	-
mp-23319	Rb	V	Cl	0	0	0	1	3.80915e-16	1.00407	-	-	-	-	-	-
mp-556424	Rb	V	F	0	1	0	0	0	1.00011	-	-	-	-	-	-
icsd-29118	La	Fe	O	0	1	0	0	0	0.999849	-	-	-	-	-	-
icsd-137722	Rb	Cu	Br	0	0.5	0	0.5	0.188106	1.0388	-	-	-	-	-	-
icsd-255843	Rb	Cu	Cl	0	0.5	0	0.5	0.171397	1.02749	-	-	-	-	-	-
icsd-139065	K	Cu	F	0	1	0	0	0.00119588	1.00435	-	-	-	-	-	-
icsd-182857	K	Cu	F	0	1	0	0	4.0726e-16	1.01443	-	-	-	-	-	-
icsd-27689	K	Cu	F	0	1	0	0	0	1.00253	-	-	-	-	-	-
icsd-87496	K	Cu	F	0	1	0	0	8.84462e-16	1.01068	-	-	-	-	-	-
icsd-31499	K	Mn	F	0	1	0	0	3.27199e-16	1.00001	-	-	-	-	-	-
