# Supplementary material for: A novel strategy for discovering inorganic solar-cell absorbers: leveraging octahedral features in ABX 3 structures
Source: Royal Society of Chemistry journal article supplement (doi:10.1039/d4ta07938h), 2025-01-01
Supplement: d4ta07938h2.xlsx [file d4ta07938h2.xlsx]

## Sheet: Properties
ABX3	Structure id	Space group	ΔEhullMP (eV)	ICSD data exsistence	EgGGA (eV)	Edirect_gapGGA-Eindirect_gapGGA (eV)	EgHSE06 (eV)	Nabs(s-1m-1)	m*e (m0)	m*h (m0)	m*mean (m0)	FoM
RbGeI3	mp-571458	221	0.012924	y	0.316041	0	0.756566	1.57504e+21	0.41005	0.134879	0.217899	2.55276e+21
CsSnI3	mp-568570	62	0.0110592	y	0.481021	0	1.2183	8.69941e+20	0.251417	0.142481	0.185503	2.46076e+21
CsSnI3	mp-616378	127	0.011844	y	0.345445	0	0.916251	1.06074e+21	0.232743	0.12149	0.16379	2.40148e+21
SbBiSe3	mp-1227508	62	0.0150286	n	0.644714	0.065454	1.19403	1.61036e+21	0.307591	3.18158	0.715935	2.27249e+21
InSbSe3	mp-1212011	62	0.0071787	n	0.560438	0.160161	1.3953	1.02716e+21	0.290708	0.867634	0.466487	2.09838e+21
SbYTe3	mp-1215924	160	0.0322549	n	0.441455	0	0.7401	2.51536e+21	0.886374	0.748047	0.812815	2.06488e+21
CsPbI3	mp-1069538	221	0.0250493	y	0.314076	0	1.14957	6.4677e+20	0.129544	0.175843	0.150051	1.91939e+21
CsSnBr3	mp-27214	221	0	y	0.231643	0	0.944317	7.59252e+20	0.274244	0.108365	0.163426	1.77355e+21
InBiSe3	mp-1223842	160	0.0253779	n	0.387752	0.094309	0.828639	1.75434e+21	1.12273	0.451581	0.676365	1.76762e+21
CsGeI3	mp-28377	160	0	y	0.886942	0.01857	1.76826	6.35393e+20	0.678831	0.290487	0.424651	1.72414e+21
NiMnO3	icsd-138859	36	-	y	0.640413	0.2159	1.80096	1.37829e+21	1.42257	3.42066	2.10311	1.71165e+21
RbSnBr3	mp-998157	1	0.0111378	n	0.299459	0	1.14183	6.29733e+20	0.32517	0.118323	0.184136	1.67567e+21
CsSnI3	mp-614013	221	0	y	0.051194	0	0.432248	1.51662e+21	0.228654	0.111452	0.154593	1.6673e+21
LaSbSe3	mp-1222966	62	0.0333306	n	0.722897	0.007163	1.27188	1.15171e+21	0.942227	0.800291	0.866919	1.57327e+21
SrCoO3	mp-505766	221	0.0817969	y	0.13127	0.148396	1.13143	1.73983e+21	9.32428	0.757013	1.83401	1.45356e+21
BiInS3	mp-1078776	11	0.00333554	y	0.983397	0.186714	1.51997	8.55077e+20	0.466955	1.98369	0.846794	1.41238e+21
SrZrS3	mp-5193	62	0	y	1.22142	0	2.02446	5.68489e+20	0.474747	1.08234	0.68724	1.38828e+21
CsGeI3	mp-642690	8	0.00863977	n	0.614976	0.001944	1.69665	4.32301e+20	0.560048	0.183966	0.297348	1.34507e+21
LaCrS3	mp-10328	62	0	y	0.3529	0	0.740114	1.45125e+21	0.715519	0.656356	0.684981	1.29778e+21
CeCrS3	mp-21871	62	0	y	0.493814	0.003977	0.807166	1.62561e+21	1.7404	0.679956	1.02993	1.29293e+21
TlTaSe3	mp-12027	62	0.024487	y	0.310526	0.047401	0.831923	1.70073e+21	0.665268	2.99038	1.22868	1.27644e+21
GeTiS3	mp-1105715	62	0	y	0.240176	0.057213	0.779774	1.69107e+21	0.930269	1.45762	1.14991	1.2297e+21
CaZrS3	mp-7781	62	0.0365725	y	1.232	0	2.03193	5.27538e+20	0.926758	0.686595	0.79322	1.20355e+21
CuTaS3	mp-3102	62	0	y	0.522302	0.036502	1.20608	1.39614e+21	1.83815	2.11445	1.96905	1.19998e+21
CsSnCl3	mp-1070375	1	0.0038986	y	0.593616	0	1.56371	3.47185e+20	0.337439	0.142298	0.209226	1.18689e+21
BaZrS3	mp-540771	62	0	y	1.04521	0	1.81925	6.9008e+20	0.570731	3.37219	1.14602	1.17272e+21
CaMnO3	mp-19201	62	0.0350749	y	0.359393	1.9e-05	1.49035	1.26292e+21	0.899847	28.8716	2.60024	1.16724e+21
SrHfS3	mp-1208643	62	0	y	1.36966	0	2.11395	4.4953e+20	0.584831	0.773279	0.669217	1.16164e+21
SbCrSe3	mp-15236	62	0	y	0.481535	0.056085	1.3132	1.13665e+21	1.69961	1.60824	1.65298	1.16098e+21
SbCrS3	mp-9130	62	0	y	0.810045	0.176652	1.54276	8.04991e+20	1.93682	0.798791	1.18479	1.14096e+21
KTaTe3	mp-568318	14	0	y	0.304699	0.00013	0.727469	2.17828e+21	1.64875	2.35755	1.95587	1.13307e+21
CsPbI3	mp-1120768	62	0.0158233	n	0.844162	0	1.95687	2.95959e+20	0.220141	0.320594	0.263329	1.12861e+21
BiInS3	icsd-138750	62	-	y	1.29727	0.140345	1.99138	5.93404e+20	0.760486	1.93508	1.14929	1.10227e+21
CaSnS3	mp-866850	63	0.0889668	n	0.438691	0.054382	1.45555	4.81691e+20	0.171428	2.16016	0.417411	1.08521e+21
CaHfS3	mp-1190098	62	0.0371404	y	1.42963	0	2.18669	3.95957e+20	0.704887	0.62024	0.660534	1.06534e+21
CsSnBr3	mp-1247749	62	0.00729489	n	0.615906	0	1.8943	2.4943e+20	0.303543	0.144244	0.202172	1.05085e+21
BiYTe3	mp-1215930	160	0.0271447	n	0.21155	0	0.503099	2.672e+21	0.578604	16.2138	1.63737	1.05055e+21
BaHfS3	mp-1105549	62	0	y	1.13612	0	1.84444	5.92779e+20	0.484874	4.94723	1.12491	1.03086e+21
TlTaS3	mp-10795	62	0.000315145	y	0.427874	0.01981	0.989163	1.2519e+21	0.700439	4.56677	1.44671	1.02955e+21
TiVO3	mp-1216763	161	0.0194347	n	0.887202	0.12056	1.13008	2.09938e+21	8.77388	3.80547	5.53344	1.00856e+21
CsGeBr3	mp-570223	221	0.0125155	y	0.55174	0	1.73639	2.71556e+20	0.468483	0.132104	0.225431	9.93115e+20
LaCrSe3	mp-1105933	62	0	y	0.031947	0.133005	0.434106	2.2864e+21	1.16188	0.872736	1.00185	9.91625e+20
BaZrSe3	mp-998427	62	0	n	0.57478	0.01096	1.166	1.03483e+21	1.16814	1.94378	1.48269	9.90927e+20
BaHfS3	mp-1383356	160	0.0282627	n	0.668494	0.403569	1.19103	8.6881e+20	0.672858	2.4816	1.16383	9.59181e+20
InSnBr3	mp-998398	1	0.0102726	n	0.692182	0	1.88143	2.94165e+20	0.720985	0.203517	0.34717	9.39308e+20
SrZrSe3	mp-541570	62	0.0271146	y	0.137843	0	0.756552	8.96635e+20	0.619001	0.446076	0.521963	9.38933e+20
LaVS3	mp-1211380	62	0.0283625	n	0.3142	0	0.919987	9.93305e+20	1.3201	0.742545	0.969863	9.27917e+20
SnZrS3	mp-17324	62	0	y	0.955568	0.006226	1.56921	6.30151e+20	0.85944	1.61835	1.15031	9.21971e+20
TlFeO3	mp-505819	14	0.047281	y	0.325402	0.277467	1.22256	5.81983e+20	0.296436	1.96281	0.614926	9.0734e+20
BiMnO3	mp-1106239	9	0.0299001	y	0.354613	0.055325	0.765468	1.80566e+21	2.35343	2.70971	2.52216	8.70317e+20
BiRhO3	mp-573119	62	0.0619842	y	0.438258	0.278656	1.71271	8.41105e+20	2.79727	2.83422	2.81566	8.58507e+20
PbSnS3	mp-1188095	62	0.00708125	y	0.974023	0.061215	1.67481	5.07526e+20	1.03756	0.935354	0.984469	8.56687e+20
CuVO3	mp-504580	148	0.0691581	y	0.978095	0.018908	1.54828	1.55273e+21	6.52754	9.90152	7.95284	8.52483e+20
PCrSe3	mp-1101069	12	0.0415224	y	0.067869	0.170944	0.816182	8.71248e+20	0.529537	0.986619	0.705593	8.46548e+20
MnTiO3	icsd-118374	161	-	y	1.72819	0.161429	1.06716	1.7917e+21	3.42317	9.25952	5.29547	8.30891e+20
MnTiO3	mp-19376	161	0.0363191	y	1.72544	0.160949	1.06721	1.76849e+21	3.35288	9.5942	5.29725	8.20026e+20
BaHfS3	mp-998352	1	0.0283551	n	0.589811	0.349723	1.27393	7.60094e+20	0.638206	5.12126	1.39449	8.19982e+20
YAgO3	mp-1369873	62	0.0795749	n	0.533409	0.065521	1.91358	4.40622e+20	0.854063	1.36758	1.0659	8.16683e+20
CaSnS3	mp-866811	62	0.0738377	n	0.731015	0.345773	1.62862	4.79049e+20	0.889026	0.943112	0.91547	8.15414e+20
SeHgO3	mp-9228	62	0.00302815	y	2.52573	0.073942	0.822086	2.46184e+21	5.40865	7.17309	6.19777	8.12942e+20
CoMnO3	mp-20641	2	0	y	1.02583	0.011815	1.92637	9.45332e+20	3.82246	7.22469	5.1242	8.0447e+20
CsPbBr3	mp-600089	221	0.00886407	y	0.680014	0	1.89075	1.78113e+20	0.184772	0.187639	0.186197	7.80446e+20
SrSnS3	mp-1205419	62	0.0101398	y	0.750283	0.293666	1.66196	4.43429e+20	0.666117	1.25925	0.893039	7.79847e+20
SnHfS3	mp-8725	62	0	y	1.09692	0.00197	1.65348	4.63566e+20	0.756077	1.39166	1.00227	7.65628e+20
YCuO3	mp-1340758	62	0.0233522	n	0.250919	0.025833	1.5708	6.57376e+20	1.83773	2.23082	2.02001	7.26538e+20
SbInS3	mp-21365	62	0	y	1.40913	0.12758	2.19761	3.63182e+20	0.561248	4.43194	1.22119	7.22241e+20
SrMnO3	mp-1193101	194	0.0150455	y	0.278991	0.028651	1.65371	8.2855e+20	5.62797	2.50836	3.60798	7.2135e+20
MgCoO3	mp-756102	62	0.091948	n	0.298326	0.194359	1.59315	7.23843e+20	1.73118	4.16501	2.55991	7.20755e+20
PbZrS3	mp-20244	62	0.00277176	y	1.25189	0.014795	1.96658	3.90574e+20	0.971237	1.36249	1.14215	7.18712e+20
TlGeBr3	mp-998746	62	0	n	1.36356	0.520756	0.715831	1.20869e+21	0.800079	3.81691	1.50583	7.0508e+20
AgAuO3	mp-776165	227	0.059382	n	0.218522	0.379734	1.52743	6.79165e+20	2.78475	1.77892	2.19802	6.99716e+20
SrZrS3	mp-558760	62	0.000940236	y	0.698663	0	1.4376	4.84733e+20	0.997246	1.05396	1.02502	6.88294e+20
YCoO3	mp-1273178	2	0.010951	n	0.636516	0.179551	0.898083	1.39934e+21	2.41692	4.92966	3.34443	6.87194e+20
MnVO3	mp-1106224	11	0.0340148	y	0.462137	0.142037	1.14514	9.09926e+20	1.20489	6.79987	2.38702	6.74432e+20
BiMnO3	mp-1105271	62	0.0256754	y	0.205577	0.001944	1.20057	1.04546e+21	2.87526	4.3048	3.48258	6.72578e+20
TlCrO3	mp-1105306	62	0.0398643	y	0.229495	0.141137	1.01032	6.15015e+20	0.373142	3.67735	0.858509	6.70614e+20
CsTaSe3	mp-1225880	186	0	n	0.17406	0.06005	0.766638	1.12786e+21	2.86614	1.11745	1.69395	6.6435e+20
BiMnO3	mp-1194603	14	0.0262128	y	0.499068	0.049616	0.518618	2.58126e+21	4.585	3.63661	4.06969	6.63589e+20
RbPbBr3	mp-998176	8	0.0393934	n	0.689398	0	2.00181	1.61874e+20	0.305251	0.223125	0.259382	6.36256e+20
PMnSe3	mp-8695	148	0	y	0.876199	0	1.52866	3.05233e+20	0.481248	0.672601	0.564969	6.20769e+20
GaCrSe3	mp-8829	62	0	y	0.631268	0.045782	1.55165	6.06397e+20	3.17956	1.77522	2.32607	6.16937e+20
CuNbO3	icsd-132720	7	-	y	1.04418	0.056077	1.83877	5.75751e+20	1.34394	12.2153	3.03131	6.08062e+20
BaSnS3	mp-1183370	62	0.0156748	y	0.866231	0.162224	1.78303	3.67706e+20	0.817978	1.99756	1.21664	5.944e+20
BaVS3	mp-542818	8	0.00132853	n	0.123048	0.029654	1.7719	3.44963e+20	2.08009	0.647747	1.06736	5.91637e+20
TlTaO3	mp-756933	227	0.00216727	n	0.318532	0.780525	0.955973	5.98232e+20	0.3535	7.40428	0.952353	5.86026e+20
CeFeO3	mp-756062	1	0.0797909	n	0.634888	0.036555	1.08742	1.65445e+21	85.0148	3.4065	9.45977	5.84939e+20
TiVO3	mp-755657	2	0	n	0.637707	0.041678	1.19709	1.55829e+21	10.0329	10.3473	10.1883	5.84418e+20
AgNbO3	mp-1220387	127	0.074484	n	0.889194	0	2.29552	2.07942e+20	0.417214	1.24585	0.669615	5.83324e+20
MnTiO3	mp-19082	148	0	y	2.21219	0.033009	2.23412	5.72803e+20	8.85296	3.20173	4.99409	5.72642e+20
TlNbO3	mp-757636	1	0	n	1.00079	0.101439	1.72449	4.09487e+20	0.94926	2.83378	1.52337	5.72136e+20
BiNiO3	mp-25096	11	0.0322426	n	0.452159	0	1.54827	1.03872e+21	7.38406	8.67976	7.99268	5.68851e+20
GeTiO3	mp-780260	148	0.0410488	n	1.01449	0.294314	1.78872	3.59364e+20	6.1644	0.537074	1.28068	5.68012e+20
BiNiO3	mp-1105718	2	0.0207189	y	0.548209	0.058766	1.71632	8.24519e+20	6.06342	6.57256	6.31029	5.63345e+20
PbHfS3	mp-22147	62	0.00505924	y	1.31201	0.070486	1.95294	3.32362e+20	1.41134	1.26825	1.33693	5.61368e+20
PNiSe3	mp-1079754	12	0.0537216	y	1.02855	0.078414	1.62773	4.03387e+20	4.04505	0.688558	1.3803	5.58877e+20
TlTaO3	mp-676262	15	0	n	0.980496	0.007831	1.60275	5.12965e+20	1.27957	4.87358	2.23765	5.49613e+20
BiFeO3	mp-548231	146	0.0621231	n	1.49458	0.0735	2.04321	4.36967e+20	3.3247	2.22501	2.6926	5.44096e+20
ZnVO3	mp-1378086	62	0.0800122	n	0.76054	0.003449	1.49042	5.39308e+20	1.07634	6.8825	2.21094	5.40576e+20
TlNbO3	mp-1101462	9	9.75172e-05	n	0.984888	0.036166	1.66137	4.28207e+20	1.02488	3.56252	1.73679	5.39818e+20
AgScO3	mp-776150	65	0.0606846	n	0.406512	0.114173	1.7487	6.28494e+20	3.55445	4.90654	4.14912	5.39558e+20
BiFeO3	mp-23501	161	0.0016325	y	1.48896	0.07115	2.04132	4.26308e+20	3.59227	2.00763	2.62948	5.3666e+20
BaMnO3	mp-35078	194	0.0199518	y	0.631983	0	2.19275	2.97141e+20	1.13142	2.04997	1.48981	5.33808e+20
CuTaO3	icsd-164934	161	-	y	1.16752	0.030875	2.11085	3.74914e+20	0.764513	33.0664	2.30409	5.21362e+20
LaCoO3	mp-1180725	2	0.0387641	y	0.718355	0.067799	2.10083	3.46528e+20	1.61746	2.70871	2.05874	5.07374e+20
ZnCoO3	mp-753026	15	0.0559529	n	0.296964	0.09045	1.39311	6.79158e+20	5.41035	2.5126	3.5547	5.01826e+20
BaHfS3	mp-998419	62	0.00750621	n	0.871602	0	1.63613	2.80412e+20	0.728499	1.02416	0.857537	4.95435e+20
MgCeSe3	mp-1232360	148	0.0885299	n	0.787321	0	1.66304	8.8234e+20	9.51264	9.3958	9.45395	4.77235e+20
SnTiO3	mp-754246	148	0	n	1.18717	0.245215	1.91693	2.73347e+20	7.79497	0.477573	1.22745	4.72955e+20
KGeBr3	mp-998412	8	0.0252312	n	1.01373	0.005648	2.41789	1.10682e+20	0.634518	0.20205	0.330278	4.65665e+20
CaCrO3	mp-20772	62	0.0557747	y	0.541162	0.090484	1.61724	8.04512e+20	4.7906	15.3381	7.88552	4.63332e+20
BaPtO3	mp-1214788	194	0.00471504	n	0.424477	0	1.5898	7.96723e+20	11.7331	5.86048	8.04743	4.465e+20
CdVO3	mp-22649	62	0.0701797	y	0.621636	0.033404	1.44469	4.99665e+20	1.10951	13.2589	2.66992	4.4178e+20
CdCoO3	mp-768578	1	0.0521114	n	0.534998	0.045023	1.79166	6.64794e+20	6.98841	8.2559	7.58259	4.32547e+20
CaVO3	mp-1435359	14	0.00881469	n	0.402923	0.122686	1.19522	5.37342e+20	0.990345	8.76362	2.21884	4.31156e+20
MgVO3	mp-1370061	62	0.0928165	n	0.6428	0.00397	1.53331	4.02119e+20	1.10406	5.10333	2.05732	4.29868e+20
ZnMnO3	mp-772528	62	0.0983825	n	0.071339	0.001324	1.80891	3.54026e+20	0.986655	8.8854	2.22032	4.29778e+20
BiMnO3	mp-23477	1	0.0281614	y	0.070336	0.064561	0.199015	2.69236e+21	1.52362	1.65253	1.58611	4.25453e+20
AgNbO3	mp-1205362	63	0.0718574	y	0.93791	0	2.34688	2.06585e+20	0.618862	4.38029	1.30766	4.23976e+20
AgNbO3	mp-557680	65	0.0917109	n	0.79103	0	2.08922	1.52952e+20	0.4209	0.827749	0.573696	4.21888e+20
AgNbO3	mp-2349989	65	0.0878246	n	0.790193	0	2.08852	1.5296e+20	0.420682	0.863656	0.583686	4.18145e+20
TlSnI3	mp-1205533	63	0	n	1.40325	0.067279	2.72021	1.01846e+20	0.275986	0.863724	0.450576	4.12726e+20
CsPbBr3	icsd-231018	127	-	y	1.01538	0	2.35805	8.47362e+19	0.23019	0.246881	0.238317	4.09304e+20
VCrO3	mp-753988	1	0.011217	n	1.43829	0.041139	2.09148	4.49963e+20	4.49119	6.4706	5.34613	4.07016e+20
CsTaS3	mp-1225870	186	0	n	0.552823	0.003656	1.2723	5.18125e+20	6.16474	1.55399	2.75502	3.97157e+20
NiCoO3	mp-1279343	1	0.000366711	n	0.956086	0	2.19717	4.2672e+20	7.15291	4.90873	5.87332	3.8687e+20
GeVO3	mp-755199	5	0.0422805	n	0.49932	0.052574	1.45068	3.61736e+20	0.542535	82.2353	1.85634	3.85155e+20
BaMnO3	mp-557535	194	0.0146762	y	0.689558	0.27876	2.27373	1.99544e+20	1.00592	2.07069	1.39723	3.83836e+20
CeMgS3	mp-1232253	148	0.0751984	n	1.12704	0	2.11818	5.26374e+20	18.7362	5.41169	9.15799	3.68433e+20
PbTiO3	icsd-29117	123	-	y	1.50583	0.018215	2.24915	1.85417e+20	4.29222	0.634452	1.32402	3.62427e+20
NiCoO3	mp-1272234	1	0.0236177	n	0.596479	0.05448	1.89804	4.83895e+20	13.6932	3.87263	6.60176	3.5746e+20
CaVO3	mp-22608	62	0.00115663	y	0.120139	0.113646	1.26231	3.76873e+20	0.687328	13.7346	1.83599	3.51096e+20
BaMnO3	mp-18840	166	0.0148978	y	0.812099	0.128026	2.39225	2.17511e+20	2.91741	1.83874	2.28554	3.44186e+20
CsPbBr3	mp-567629	62	0.00127028	y	1.15106	0	2.58797	6.97835e+19	0.270296	0.287893	0.278886	3.41978e+20
FeTiO3	mp-20073	62	0.0718264	y	1.31821	0.06965	1.96941	3.68624e+20	1.67605	36.6717	4.55053	3.40322e+20
SrMnO3	mp-1218206	186	0.0126189	n	0.739766	0.033839	2.36007	1.79903e+20	1.54364	1.59692	1.56994	3.38861e+20
BiNiO3	mp-998527	146	0.0109814	n	0.665403	0.076114	1.83909	5.36588e+20	6.05208	12.9575	8.54233	3.37642e+20
SrCrO3	mp-761337	1	0.057636	n	0.712001	0.129063	1.68055	5.49126e+20	11.3737	5.42204	7.5896	3.34976e+20
SrMnO3	mp-19001	194	0.00306365	y	0.768648	0.028325	2.3777	1.76062e+20	1.64098	1.62217	1.63153	3.27736e+20
VCrO3	mp-770855	5	0.0115463	n	1.24797	0.001769	1.79782	5.54183e+20	10.9901	8.61327	9.69333	3.20009e+20
CsPbBr3	mp-1014168	140	0.00898189	n	1.12918	0	2.6071	6.55064e+19	0.283298	0.290321	0.286777	3.18911e+20
LaScS3	mp-1190131	33	0	n	1.79896	0	2.77384	1.27303e+20	1.96059	0.909481	1.28728	3.11232e+20
LaRhO3	mp-5163	62	0	y	0.375872	0.000164	2.01291	3.92822e+20	11.6811	4.173	6.5391	3.09215e+20
CeScS3	icsd-622042	33	-	y	1.79576	0	2.77029	1.33292e+20	3.03539	0.84117	1.44409	3.07278e+20
VCrO3	mp-770843	1	0.0111875	n	1.12234	0.196135	1.92127	3.50882e+20	3.10583	8.51809	4.82968	3.06755e+20
FeTiO3	mp-19417	148	0.0120412	y	1.55152	0.035432	2.19257	3.80369e+20	5.198	11.7108	7.48903	3.04752e+20
InRhO3	mp-1105819	62	0.0739175	y	0.22914	0	2.11476	1.30256e+20	0.409943	2.67418	0.846832	2.99337e+20
CaSnS3	mp-866826	148	0.0723756	n	1.71178	0.071658	2.87595	1.18722e+20	0.738201	3.31025	1.36233	2.92531e+20
TlNbO3	mp-977408	221	0.0906741	n	0.11432	0.02737	0.730027	5.12409e+20	8.28516	0.730354	1.73691	2.83835e+20
FeSnO3	mp-1178214	1	0.0351845	n	0.699298	3.4e-05	1.48276	1.69279e+20	0.249421	15.9539	0.788244	2.82713e+20
AgSbO3	mp-545999	148	0	y	0.040914	0	1.92353	1.22486e+20	0.26173	5.60225	0.707851	2.80035e+20
YScS3	icsd-23422	33	-	y	1.75702	0.107904	2.76462	1.21408e+20	4.37515	0.709238	1.44201	2.7951e+20
BaMnO3	mp-757501	8	0.0184104	n	0.770338	0.12458	2.38517	2.04779e+20	2.84023	3.60677	3.18924	2.73503e+20
LaScS3	icsd-641844	33	-	y	1.80397	0	2.77969	1.24355e+20	2.53975	1.10484	1.60462	2.72882e+20
RbPbCl3	mp-1209191	221	0.0383528	n	1.07217	0	2.55124	5.1635e+19	0.250397	0.22235	0.235749	2.71313e+20
CeVO3	mp-18769	62	0	y	1.28531	0	1.67394	5.33431e+20	16.75	8.08599	11.2605	2.66096e+20
ScCoO3	mp-754124	14	0.0669737	n	1.16113	0.079524	2.76162	4.70166e+20	20.3714	30.0218	24.4993	2.62324e+20
GaInS3	mp-19885	36	0.0171784	y	1.67568	0.101831	2.87101	6.74058e+19	0.225897	3.00497	0.556556	2.59405e+20
GaVO3	mp-755580	62	0.0920561	n	1.2585	0.277683	2.36373	1.31104e+20	0.816442	3.54402	1.49101	2.5379e+20
MgMnO3	mp-770581	62	0.0767369	n	0.394987	0.08817	2.27281	2.06047e+20	1.33847	20.8579	3.40835	2.53663e+20
CsPbCl3	mp-23037	221	0.00829049	y	1.08599	0	2.58675	4.72902e+19	0.251444	0.226562	0.238517	2.50476e+20
CsPbCl3	mp-675022	155	0.011753	n	1.13978	0.00012	2.75156	4.64132e+19	0.294255	0.238643	0.264269	2.48426e+20
PbTiO3	icsd-27949	47	-	y	1.50569	0.018194	2.48041	1.151e+20	5.75383	0.634354	1.43007	2.38737e+20
BaMnO3	mp-675227	166	0.0146679	n	0.90055	0.213634	2.47801	1.38919e+20	1.73939	2.5529	2.08798	2.38234e+20
CeScS3	mp-20953	1	0	y	1.79597	0	2.76354	1.36739e+20	3.49775	1.96186	2.56558	2.3592e+20
CsGeBr3	mp-1068340	160	0	y	1.32507	0	2.98309	4.81338e+19	0.663125	0.25295	0.386673	2.30912e+20
CsPbBr3	mp-1120725	38	0.00765579	n	2.28593	0.02903	4.05645	2.77181e+19	0.232385	0.249554	0.24074	2.29158e+20
VCrO3	mp-770849	1	0.0111288	n	1.20557	0.050437	2.13064	2.75914e+20	4.70686	10.9096	6.8585	2.24475e+20
YScS3	mp-7792	62	0.00890821	n	1.76747	0.109841	2.94814	8.36686e+19	2.74814	0.720259	1.2603	2.19722e+20
CrVO3	mp-754036	1	0.010773	n	1.20473	0.004908	2.1029	2.92405e+20	6.885	9.37152	7.98507	2.17602e+20
MnTiO3	mp-556925	62	0.0599898	y	1.65996	0.042696	2.6968	1.6747e+20	3.15744	6.43706	4.36829	2.16088e+20
VCrO3	mp-755281	1	0.0123088	n	1.13314	0.018066	2.12153	2.53033e+20	5.73156	6.76415	6.21582	2.15316e+20
PbTiO3	mp-19845	221	0.0412217	y	1.50697	0.018233	2.4796	1.15757e+20	17.0618	0.64341	1.80468	2.13662e+20
PNiS3	mp-676040	12	0.0513325	y	1.47086	0.05494	2.09135	1.3821e+20	5.93195	0.878316	1.83207	2.13547e+20
SrCrO3	mp-769855	1	0.07022	n	0.731831	0.019062	1.94739	4.01003e+20	14.3082	12.5339	13.3771	2.13511e+20
TiFeO3	mp-19270	161	0.0317737	y	1.55755	0.07299	2.41748	2.94462e+20	5.25748	39.9839	11.3264	2.11518e+20
AgNbO3	mp-12725	221	0.0919056	y	1.3344	0.191614	2.59498	1.46435e+20	2.86821	3.69856	3.24391	2.10981e+20
VCrO3	mp-1216392	161	0.00751148	n	1.48403	0.131498	2.51776	2.19031e+20	16.0478	3.89091	6.9878	2.08618e+20
MgFeO3	mp-1279364	1	0.070221	n	0.789832	0.126169	2.23617	3.14809e+20	6.80495	24.1949	11.6228	2.06488e+20
YRhO3	mp-1207629	62	0	n	0.974781	0	2.64803	1.69429e+20	6.71767	3.58824	4.79093	2.04974e+20
FeSnO3	mp-1178212	2	0	n	0.505928	0.066137	1.1681	1.56675e+20	0.246214	23.3956	0.810117	2.03333e+20
AgTaO3	icsd-230608	127	-	y	1.52908	0	2.88692	6.22307e+19	0.473458	1.53437	0.782721	2.03066e+20
VCrO3	mp-770779	1	0.00938144	n	1.45272	0.028734	2.28989	3.18994e+20	40.3808	6.33778	13.0053	2.02552e+20
CuNbO3	mp-17272	12	0.0177182	y	1.31812	0.04358	2.19778	2.96651e+20	6.05323	22.0912	10.4324	2.01854e+20
AgAsO3	mp-1178563	148	0	n	0.250244	0	2.16015	7.13486e+19	0.230146	4.62891	0.615497	1.96452e+20
RbPbBr3	icsd-22272	62	-	y	1.38556	0	2.9033	3.97123e+19	0.344028	0.364665	0.354121	1.93749e+20
VCrO3	mp-1101715	1	0.00970204	n	1.37848	0.00986	2.35344	2.4077e+20	19.6967	5.18224	9.05602	1.88294e+20
TiFeO3	mp-1277107	2	0	n	1.67956	0.059637	2.10546	3.42848e+20	8.15399	34.6756	14.7918	1.87688e+20
MnSnO3	icsd-118375	161	-	y	0.211777	0	1.71267	8.42512e+19	0.214047	6.58485	0.614595	1.84058e+20
BiCrO3	mp-23456	15	0.0226828	y	1.65003	0.077345	2.72429	6.62231e+19	0.507866	2.4744	0.962171	1.83924e+20
MnSnO3	mp-691106	1	0.0223196	n	0.658533	0.12993	2.17883	7.02529e+19	0.260391	5.3074	0.698072	1.83205e+20
BaMnO3	mp-19156	194	0.000148323	y	1.8716	0	2.81975	9.10346e+19	1.57877	2.96135	2.10964	1.76731e+20
BaMnO3	mp-1205336	186	0	y	1.8763	0	2.82487	9.075e+19	1.57971	3.00001	2.12194	1.75986e+20
TlGeBr3	mp-998153	8	0.0279997	n	1.01368	0.010625	2.8394	3.58124e+19	0.564197	0.227935	0.34081	1.74182e+20
FeMnO3	mp-759744	1	0.0665826	n	0.256268	0.012963	0.991323	1.26306e+21	22.3561	224.79	51.6851	1.74164e+20
VCrO3	mp-770778	1	0.0129728	n	1.19303	0.018608	2.30704	1.94043e+20	5.34475	8.65502	6.70358	1.72902e+20
InRhO3	mp-1203220	14	0.0406221	y	1.05221	0	2.81599	1.21958e+20	4.01362	3.97965	3.99658	1.7179e+20
CsGeBr3	icsd-60350	160	-	y	1.31879	0	3.11677	3.32244e+19	0.612069	0.252954	0.374884	1.69127e+20
VCrO3	mp-757023	1	0.0132536	n	1.09112	0.226638	2.26416	1.68233e+20	3.35396	9.48219	5.27522	1.65843e+20
ScVO3	mp-756546	62	0.049392	n	1.35371	0.167004	2.29003	1.74316e+20	5.38712	6.73103	6.00307	1.62926e+20
GeFeO3	mp-22334	15	0	y	0.751259	0.044541	1.2595	1.32491e+20	0.324641	52.476	1.11609	1.57956e+20
TlPbI3	icsd-34293	63	-	y	1.49	0	3.18682	3.63251e+19	0.29039	1.46274	0.555865	1.55267e+20
GeMnO3	mp-643577	61	0.00273475	y	0.994146	0	1.85385	7.44935e+19	0.273052	10.9658	0.814778	1.52994e+20
TlPbI3	mp-27552	63	0.0108973	y	1.50163	0	3.19284	3.62583e+19	0.293861	1.62967	0.579151	1.52121e+20
PbZrO3	mp-1068577	221	0.0818658	y	2.09686	0.081263	3.20464	4.79696e+19	0.343448	21.206	1.08111	1.47846e+20
AsAgO3	mp-775767	15	0.0372679	n	0.486724	0.148536	2.33983	5.37304e+19	0.283266	4.86537	0.735373	1.46605e+20
BiVO3	mp-756282	14	0.0103641	n	1.0058	0.007147	2.05753	1.96973e+20	25.0383	4.08048	8.28372	1.40813e+20
SrTcO3	mp-1188414	62	0	y	0.104993	0.076683	2.29343	9.05014e+19	1.28603	4.43497	2.1733	1.40793e+20
BiFeO3	icsd-237537	1	-	y	1.37946	0.097294	2.56464	1.08366e+20	4.75014	3.32767	3.94448	1.39934e+20
TlGeI3	mp-29288	62	0.0165256	y	1.69426	0.050453	3.24706	4.2619e+19	0.439448	3.83054	0.980837	1.39732e+20
RbPbCl3	mp-998605	8	0.0381326	n	1.29242	0	2.91441	2.91273e+19	0.490671	0.294057	0.373692	1.38865e+20
BaMnO3	mp-19267	185	0.00734967	n	2.07435	0.0064	3.01643	9.50548e+19	2.58625	9.3141	4.43695	1.36121e+20
BiCrO3	mp-559851	62	0.0112027	y	1.88628	0.322953	3.19149	4.75046e+19	0.690299	2.95984	1.25561	1.35301e+20
MnSnO3	mp-20569	148	0	y	0.928669	0.033232	2.12994	5.31814e+19	0.227109	14.0839	0.715248	1.33937e+20
BaCoO3	mp-1283250	1	0.0010552	n	1.15032	0.206226	2.56563	1.29095e+20	13.6119	3.58338	6.26077	1.3237e+20
PbHfO3	mp-755790	62	0.0144742	n	2.50835	0	3.524	3.26866e+19	0.419995	1.77511	0.760366	1.32097e+20
CeCrO3	mp-780712	1	0.0529606	n	1.40863	0.004071	1.95973	1.54661e+20	1.96045	44.6384	5.35988	1.30918e+20
PbZrO3	mp-755798	62	0.0345872	n	2.49358	0	3.51175	3.34825e+19	0.476101	1.67125	0.809573	1.30681e+20
YMnO3	mp-20699	62	0.0230953	y	0.378537	0	2.08103	9.92883e+19	1.7352	4.58119	2.65967	1.26696e+20
YVO3	mp-18883	14	0	y	1.34742	0.027343	2.12672	1.88928e+20	7.27589	15.043	10.1244	1.26277e+20
LaCrO3	icsd-138703	221	-	y	1.61885	0.286404	3.0282	1.21232e+19	3.87649	0.0247803	0.0849879	1.25928e+20
PMnS3	mp-1232516	1	0.00666332	n	2.1702	0.017404	2.99202	5.17255e+19	1.06201	2.52579	1.56331	1.23779e+20
NiMnO3	mp-19331	148	0	y	1.66147	0.234917	2.85333	1.41819e+20	12.1724	9.55597	10.7458	1.23444e+20
PbHfO3	mp-22535	221	0.0402784	y	2.17814	0.03978	3.25149	4.01174e+19	0.340942	49.5942	1.16293	1.20959e+20
PbZrO3	mp-1100803	6	0.0360627	n	2.11692	0.470503	3.09808	2.96206e+19	0.415291	0.852392	0.576151	1.20898e+20
AgTaO3	mp-9890	167	0.0220716	y	1.74675	0.009175	3.23883	3.85225e+19	0.501599	5.00534	1.15753	1.15967e+20
SnHfO3	mp-776083	148	0.0686866	n	2.4269	0.783046	3.18243	3.61111e+19	2.05515	0.577306	0.98646	1.15707e+20
AgTaO3	icsd-230607	63	-	y	1.6192	0	3.08504	4.54497e+19	0.656918	7.37371	1.55848	1.12316e+20
BMnO3	mp-1289597	1	0.017863	n	0.976925	0.090705	2.80968	6.73008e+19	3.33653	2.50095	2.87373	1.11546e+20
AgTaO3	icsd-40830	161	-	y	1.74437	0.010122	3.25529	3.66223e+19	0.503913	4.82693	1.1514	1.11102e+20
CoSnO3	mp-752613	62	0.076266	n	0.956193	0	2.42915	3.63265e+19	0.220599	6.75285	0.632927	1.10918e+20
ScRhO3	mp-1196890	14	0.0246143	y	1.25979	0.003282	2.94826	9.49867e+19	16.6243	3.42988	6.4875	1.09949e+20
PbZrO3	mp-647557	32	0.0300291	y	2.60009	0	3.65822	2.50573e+19	0.480524	1.21216	0.723775	1.07746e+20
BiCrO3	mp-546027	161	0.014705	y	2.20027	0.38685	3.3727	3.5644e+19	1.13673	1.38469	1.25155	1.07458e+20
AlVO3	mp-765647	8	0.0887326	n	0.959711	0	1.78422	1.51727e+20	3.56881	16.8663	6.69702	1.04609e+20
AgNbO3	mp-5537	57	0.0594938	y	1.70258	0.028274	3.09729	5.08107e+19	0.973237	10.2556	2.27524	1.04334e+20
PbZrO3	mp-20337	38	0.032543	y	2.7292	0.033189	3.81913	2.11196e+19	0.483261	0.772431	0.602648	1.039e+20
PbZrO3	mp-542903	55	0.0254876	y	2.57445	0	3.65307	2.34233e+19	0.47431	1.06177	0.681614	1.03642e+20
SbBiO3	mp-755382	148	0.086162	n	1.81021	0.300454	3.05379	4.69922e+19	3.88292	1.17966	1.96105	1.02476e+20
PbHfO3	mp-669414	32	0.0125117	y	2.65835	0.078682	3.73046	2.17834e+19	0.480145	0.881453	0.63578	1.01914e+20
PMnS3	mp-8613	12	0	y	1.31108	8.4e-05	2.09268	5.37557e+19	1.06606	1.53252	1.26772	9.99115e+19
FeInO3	mp-21094	194	0.0474834	y	0.789849	0.050387	1.77878	1.03797e+20	1.79111	9.14881	3.44328	9.94999e+19
RbSnI3	mp-29405	62	0	y	2.1926	0	3.56586	3.47541e+19	1.35996	1.89482	1.59428	9.81498e+19
HgAsO3	mp-30284	162	0	n	1.23057	0	2.78606	2.06568e+19	0.182745	0.914411	0.349092	9.74055e+19
ZnMnO3	mp-754318	148	0.00579423	n	1.58861	0.027507	3.14361	7.9426e+19	7.98092	6.06095	6.92218	9.4901e+19
PbHfO3	mp-22734	32	0.00902238	y	2.49935	0	3.62141	2.1203e+19	0.443409	1.08903	0.660981	9.44452e+19
BiInO3	mp-561102	62	0.0399235	y	2.13214	0.102478	3.3792	3.58625e+19	0.724975	7.31809	1.67764	9.35632e+19
AgNbO3	mp-1203481	26	0.0605652	y	1.69866	0.030607	3.09305	5.08554e+19	1.09701	18.3683	2.83375	9.34421e+19
ScCoO3	mp-1643785	14	0.066706	n	0.448821	0.091863	3.23304	4.76777e+19	1.35208	8.70742	2.78294	9.24007e+19
AgSbO3	mp-860791	5	0.0436602	n	0.083004	0.020597	1.92124	4.25037e+19	0.275122	9.91914	0.808693	9.08064e+19
CeAlO3	mp-5323	221	0.017115	y	2.39346	0	2.72196	3.49637e+19	0.482209	4.71805	1.10751	9.04325e+19
ScMnO3	mp-1105811	14	0.0499739	y	0.844127	0.102095	2.64811	8.73189e+19	4.65858	10.725	6.76998	8.88692e+19
ScRhO3	mp-1188449	62	0.0511401	n	1.08171	0.10897	3.01641	6.04638e+19	4.42369	4.13968	4.27815	8.81775e+19
VCdO3	mp-556857	62	0	y	1.39812	0.023815	2.61827	5.98713e+19	7.49731	1.7547	3.18803	8.77953e+19
ZnMnO3	icsd-24467	148	-	y	1.58681	0.027567	3.14203	7.9924e+19	8.452	8.30845	8.37976	8.67506e+19
CsPbCl3	icsd-230497	62	-	y	1.51145	0	3.20521	1.50192e+19	0.338059	0.315241	0.326351	8.42677e+19
VAlO3	mp-756082	62	0.0864431	n	1.95371	0.125386	3.04192	6.44743e+19	3.08735	12.0193	5.43904	8.40955e+19
BiAlO3	mp-551918	161	0.0533351	y	2.67532	0.046447	3.82613	2.72802e+19	0.64279	7.98201	1.56009	8.35665e+19
CsGeBr3	mp-642739	8	0.00062439	n	1.05508	0	3.14309	1.45994e+19	0.559422	0.198125	0.31147	8.22211e+19
NiVO3	mp-1273627	1	0.0570113	n	0.858597	0.0505	2.61494	1.37199e+20	19.6164	19.3809	19.4981	8.12486e+19
CsSnI3	mp-27381	62	0.00324934	y	2.23409	0	3.60556	3.22817e+19	1.1406	4.89886	2.07582	8.07859e+19
CeAlO3	mp-776167	62	0.00307535	n	2.82404	0	3.01093	3.37505e+19	0.686395	6.88373	1.58589	8.06949e+19
CCoO3	mp-21434	167	0	y	2.37328	0.099567	2.26702	1.00735e+20	57.6685	3.04668	8.05718	8.04536e+19
CeAlO3	mp-4096	140	0.0056002	y	2.26073	0	2.54267	3.47206e+19	0.498598	6.18214	1.20972	8.02666e+19
CeAlO3	icsd-236142	140	-	y	2.46441	0	2.75272	3.31473e+19	0.507183	7.94927	1.29302	8.0243e+19
CMnO3	mp-18814	9	0	y	3.5854	0.380161	3.48838	2.7667e+19	0.878875	3.13189	1.50229	7.87427e+19
LaVO3	mp-19350	2	0	y	1.58229	0.062259	2.57101	7.99386e+19	13.1268	4.23438	6.8894	7.83015e+19
PMnS3	icsd-62863	12	-	y	1.36213	0.008591	2.37111	3.02311e+19	0.70031	1.03943	0.844921	7.79826e+19
CaNiO3	mp-754103	186	0.072651	n	1.21466	0.244333	2.89873	4.57978e+19	6.31982	1.68027	2.92586	7.76115e+19
MgFeO3	mp-754508	148	0.0715508	n	1.13885	0.062219	2.64749	1.0429e+20	7.86384	24.974	12.9065	7.68547e+19
KSnI3	mp-1097015	62	0	n	2.25467	0.06232	3.70575	2.78897e+19	4.71683	1.12886	2.03605	7.24313e+19
CMnO3	icsd-8433	167	-	y	3.48742	0.46081	3.4895	2.445e+19	0.735609	3.60071	1.39566	7.2219e+19
BiScO3	mp-1101383	148	0.0735853	n	1.98271	0	3.25422	3.11754e+19	1.7121	2.30214	1.97448	7.21992e+19
CeNiO3	mp-776207	14	0.0952567	n	1.17521	0.012654	2.79605	6.03572e+19	84.8427	1.86677	5.66258	7.09196e+19
BiFeO3	mp-22949	160	0.0335794	y	2.32605	0.20397	3.68294	2.62505e+19	1.12009	3.68766	1.86216	7.08473e+19
FeScO3	mp-754342	194	0.0729476	n	0.623392	0.348464	1.69618	6.2601e+19	1.65161	3.28478	2.26172	7.06049e+19
CaPtO3	mp-4784	63	0.0105473	y	1.34797	0.057766	3.16374	3.1784e+19	1.30502	3.81023	2.07724	6.97697e+19
TeNiO3	mp-1209810	62	0.0463462	n	2.34539	0.050608	3.36687	2.93715e+19	1.0015	6.0397	2.02299	6.95274e+19
GaFeO3	mp-649086	33	0.0357892	y	1.72309	0.028683	2.61173	8.74705e+19	12.6278	9.48437	10.8879	6.92338e+19
BiScO3	mp-756205	62	0.0321572	n	2.51934	0.011326	3.73685	2.65204e+19	1.56305	3.03553	2.11934	6.80749e+19
BaNiO3	mp-19241	186	0	y	1.44029	0.017917	3.14547	3.99798e+19	4.11297	2.92129	3.44106	6.77922e+19
InCrO3	mp-756147	62	0.0512829	y	1.65548	0.3666	3.0681	1.91331e+19	0.335723	3.13973	0.762607	6.72208e+19
BaNiO3	mp-19138	194	0.000139646	y	1.43971	0.016248	3.145	3.99712e+19	4.36435	2.92023	3.53422	6.68685e+19
CeAlO3	mp-3408	167	0.000638456	y	2.82386	0	3.12802	2.93407e+19	0.759058	11.1722	1.91048	6.64001e+19
PbTiO3	mp-1106215	2	0.00310551	y	2.08051	0	3.20816	3.33168e+19	1.34509	7.13157	2.61538	6.60925e+19
CuTaO3	mp-756050	12	0.0235564	n	1.8547	0.054279	2.8114	9.20454e+19	8.6447	37.5473	15.7902	6.51225e+19
AgTaO3	mp-1187189	221	0.0354766	n	1.71695	0.314409	3.29799	1.83976e+19	0.39075	3.36952	0.869762	6.50593e+19
MgFeO3	mp-1303831	1	0.0703978	n	1.15646	0.030589	2.79312	7.34517e+19	11.4402	9.67024	10.4995	6.3315e+19
LiMnF3	mp-763149	198	0.0325726	n	3.4004	0.243504	2.32773	3.3421e+19	0.604066	9.78987	1.55037	6.2479e+19
LaFeO3	mp-1078634	167	0	y	0.910208	0.013994	2.19251	3.75085e+19	2.60524	1.32091	1.8026	6.12521e+19
RbGeI3	mp-567855	19	0.0045993	y	2.22928	0.089622	3.74656	2.27733e+19	1.62086	2.39889	1.95305	6.10523e+19
SrCrO3	mp-781082	1	0.0652886	n	0.694344	0.008527	2.53353	1.14034e+20	17.8597	31.1124	23.1242	6.00795e+19
TiNiO3	mp-18732	148	0	y	2.76268	0.031344	3.90503	2.50969e+19	4.16911	1.85859	2.67311	5.99427e+19
BVO3	mp-18946	167	0	y	1.68071	0.099785	2.64685	8.72323e+19	4.90441	291.932	15.374	5.88862e+19
TiCoO3	icsd-36938	148	-	y	2.05214	0.06982	3.39013	4.16087e+19	4.62445	9.17529	6.32644	5.60817e+19
HfNiO3	mp-1178219	14	0.0968433	n	2.93898	0	3.40704	2.36124e+19	3.88691	1.4097	2.19653	5.4281e+19
GeMnO3	mp-1106201	15	0	y	1.22641	0.250478	2.53146	1.98724e+19	0.351045	5.94779	0.908909	5.27668e+19
BiInO3	mp-556892	33	0.0289431	y	2.42828	0.086176	3.8376	2.01303e+19	0.980173	8.04644	2.1544	5.26317e+19
FeHfO3	mp-753856	62	0.0626526	n	2.73027	0	3.37947	2.37316e+19	1.58789	3.99403	2.38904	5.18877e+19
BiGaO3	mp-755568	161	0.0491069	n	2.81058	0.226246	4.09038	1.89986e+19	1.38851	4.77128	2.34355	5.0763e+19
TiCoO3	mp-19424	2	0.00315471	y	2.05115	0.032435	3.37673	4.38321e+19	5.72696	14.4187	8.61959	5.04134e+19
PbSnO3	mp-1101720	55	0.0762581	n	1.45016	0.227388	2.90659	2.1772e+19	0.937507	3.26942	1.59052	5.01777e+19
GeCoO3	mp-550220	1	0	n	1.22672	0.002632	2.51986	1.90598e+19	0.326086	13.8228	0.980139	4.85123e+19
BiScO3	icsd-171384	5	-	y	2.51489	0.113354	3.80719	1.65108e+19	0.742399	6.82645	1.67934	4.85069e+19
TiNiO3	mp-850194	161	0.0139521	n	2.78064	0.035775	3.81657	3.54647e+19	5.92717	10.7027	7.79339	4.84849e+19
TlSbO3	mp-30058	148	0.000221677	y	2.4083	0.017026	3.61744	2.44288e+19	7.42941	1.95064	3.41116	4.78467e+19
BiScO3	mp-555769	15	0.0344824	n	2.51639	0.113915	3.81775	1.69569e+19	0.740093	10.5019	1.84861	4.76135e+19
CsPbI3	mp-540839	62	0	y	2.13592	0	3.77839	1.70917e+19	1.57668	2.19103	1.84612	4.75294e+19
CeScO3	mp-777413	14	0.0134832	y	2.97149	0	3.36654	3.50473e+19	2.18553	64.1178	6.22953	4.72728e+19
YCoO3	mp-22668	2	0	y	0.218396	0.134355	3.14094	1.96909e+19	1.96972	1.50153	1.71187	4.72706e+19
YBiO3	mp-768221	161	0.0330222	n	2.63307	0.169437	4.01257	1.67482e+19	1.06991	5.16867	2.02161	4.72654e+19
BiScO3	mp-555313	9	0.0337338	y	2.52009	0.114669	3.8118	1.7282e+19	0.752254	13.8967	1.98032	4.68118e+19
TlSbO3	mp-557787	163	0	n	2.39575	0.018102	3.59892	2.48758e+19	7.22006	2.22123	3.67606	4.66936e+19
YCrO3	icsd-28909	65	-	y	1.59209	0.45892	2.75303	1.77771e+19	0.595028	2.85418	1.12182	4.62075e+19
RbPbI3	mp-23517	62	0	y	2.12856	0	3.79809	1.69851e+19	1.82709	2.13565	1.97235	4.59345e+19
BiScO3	mp-754009	161	0.0214324	n	2.74444	0.082796	4.0368	1.92219e+19	1.08204	23.2498	2.92838	4.53441e+19
KPbI3	mp-1211504	62	0.0138062	n	2.15225	0.014892	3.76233	2.03472e+19	3.31529	2.51699	2.87504	4.51482e+19
SrMnO3	mp-559975	20	0	y	1.69119	0.010857	3.3915	3.25191e+19	16.7011	3.0662	6.01055	4.49855e+19
SiFeO3	icsd-243696	14	-	y	2.86711	0.000642	3.21057	2.75508e+19	1.60761	21.3695	3.96014	4.44489e+19
AlFeO3	mp-21216	33	0.0439558	y	1.62964	0.051452	2.65003	5.90016e+19	12.1737	12.9574	12.5564	4.41247e+19
CsPbCl3	mp-675524	38	0.00316032	n	2.79405	0.008815	4.82158	4.70241e+18	0.304967	0.287821	0.296208	4.16593e+19
TiNiO3	mp-690546	1	0.0184077	n	2.2142	0.114724	3.24611	4.31196e+19	15.7244	8.85834	11.5626	4.11633e+19
CoSnO3	mp-761574	2	0.0348254	n	1.10603	0.165882	2.65088	1.36699e+19	0.247665	19.4093	0.799768	4.05202e+19
InMnBr3	mp-28912	62	0.00409645	y	1.84855	0.383541	3.33697	1.27825e+19	0.646842	2.55808	1.14558	3.98525e+19
CsPbCl3	mp-1539667	38	0	n	2.78753	0.018599	4.82789	4.48723e+18	0.304813	0.287584	0.296011	3.98182e+19
BMnO3	mp-1278986	1	0.0298328	n	0.140133	0.05713	3.02511	1.31817e+19	0.824465	1.97458	1.21697	3.6147e+19
TlHgCl3	mp-1105094	62	0	y	2.56102	0.000195	3.80784	1.48365e+19	1.5779	4.46893	2.48342	3.58496e+19
RbSnBr3	mp-998778	62	0	n	2.46519	0.042049	3.93602	1.12056e+19	0.88152	3.30474	1.53328	3.56188e+19
InPbCl3	mp-998535	8	0.0177252	n	1.60253	0.000346	3.49013	8.65448e+18	1.21245	0.505458	0.74655	3.49585e+19
LaCrO3	mp-19281	62	0	y	1.9178	0	3.36417	1.64363e+19	2.03947	3.18891	2.51865	3.48415e+19
LaCrO3	mp-19357	167	0.00742642	y	1.91718	0.029641	3.41407	1.30842e+19	1.19221	2.75892	1.73611	3.39024e+19
MgMnO3	mp-770618	148	0	n	1.85754	0.026723	3.64375	2.73623e+19	7.36064	10.6503	8.77889	3.36497e+19
MgMnO3	icsd-19259	148	-	y	1.85509	0.026611	3.64544	2.69476e+19	7.72623	10.3234	8.8842	3.2958e+19
MnAlO3	mp-774250	2	0.0596549	n	1.51444	0.199949	3.26434	2.3971e+19	13.2384	3.11741	5.65257	3.29124e+19
YBiO3	mp-754152	148	0.0476748	n	2.27027	0.073004	3.69946	1.26762e+19	1.36331	3.58661	2.08682	3.24628e+19
HfFeO3	mp-753790	62	0.0961926	n	1.83733	0	2.90204	1.14151e+19	0.974538	1.34535	1.13762	3.10587e+19
SeNiO3	mp-20460	62	0	y	2.99209	0.019766	3.99674	1.42593e+19	3.10247	4.88806	3.84436	2.90664e+19
GeCoO3	mp-22136	2	0.00135151	y	1.20638	0	2.73643	1.02932e+19	0.32735	11.174	0.95464	2.88278e+19
SiFeO3	icsd-243692	15	-	y	2.57627	0	3.34382	9.60478e+18	0.395312	38.6405	1.3041	2.81238e+19
TiNiO3	mp-531689	1	0.0159401	n	1.55846	0.080425	2.57965	4.97163e+19	22.7676	21.3575	22.0456	2.73148e+19
FeAlO3	mp-1178577	148	0.0325529	n	2.13343	0.050101	3.45588	2.233e+19	5.97855	13.7798	8.69218	2.61748e+19
InMgBr3	mp-29483	62	0.0112515	y	2.04904	0.406033	3.65826	7.77528e+18	0.662106	2.8737	1.2091	2.58678e+19
SnNiO3	mp-754654	148	0.026179	n	1.96665	0.063867	3.55544	6.68282e+18	0.258796	29.6845	0.865928	2.55336e+19
LaCrO3	mp-18841	221	0.0914568	y	1.61637	0.300032	2.84603	1.78485e+19	15.7814	1.88085	4.15742	2.49132e+19
TiNiO3	mp-675030	1	0.020319	n	2.24206	0.024657	3.24837	4.81053e+19	36.3015	43.3762	39.603	2.4831e+19
TiNiO3	mp-698587	1	0.0200128	n	1.63419	0.079641	2.68333	4.79839e+19	33.6457	22.9469	27.5332	2.45381e+19
InCaI3	mp-1206105	63	0.0213104	n	2.72577	0.077321	4.58152	5.18594e+18	0.467536	2.82026	0.944472	2.44479e+19
LaBiO3	mp-755003	148	0.0406505	n	2.43208	0.086123	3.99824	8.17955e+18	1.18303	3.23821	1.83829	2.41208e+19
CeCrO3	icsd-28931	221	-	y	1.5903	0.337937	2.9525	1.44031e+19	7.21524	1.84857	3.2595	2.35544e+19
AlRhO3	mp-1178547	194	0.0432351	n	1.83343	0.061461	3.86766	1.15477e+19	1.73458	12.3087	3.66774	2.33207e+19
BiFeO3	mp-645159	62	0.0116058	y	1.15874	0	3.19073	1.35623e+19	2.86801	4.67208	3.6066	2.27863e+19
ScFeO3	mp-769734	2	0.0839462	n	1.11726	0	2.74298	1.23393e+19	4.95539	1.37691	2.36165	2.20244e+19
SeZnO3	mp-4682	62	0.0621415	y	3.87757	0.246224	5.21636	6.56079e+18	1.381	5.54139	2.45768	2.18304e+19
LaBiO3	mp-768310	161	0.0351945	n	2.45001	0.015652	4.0841	1.08479e+19	2.38154	8.90216	4.13825	2.17788e+19
LaCoO3	mp-1273989	2	0.0179205	n	0.723424	0	3.18096	1.16846e+19	19.7305	1.23225	3.15502	2.09252e+19
InFeO3	icsd-241833	161	-	y	1.56002	0	3.25055	1.19375e+19	5.77941	2.38264	3.53453	2.06398e+19
GaFeO3	mp-868005	1	0.0366685	n	1.60876	0.001992	2.94183	2.69675e+19	17.3255	14.6503	15.9039	1.98933e+19
FeAlO3	mp-776154	62	0.0803161	n	2.25136	0.016941	3.87561	1.44187e+19	15.1413	5.38053	8.44805	1.92259e+19
MnZrO3	mp-754980	148	0.0259151	n	3.65026	0.114865	4.74305	1.01411e+19	4.53525	10.2178	6.53421	1.88168e+19
TlMnI3	mp-23443	62	0.0170266	y	1.94627	0.33702	3.80748	6.68156e+18	0.928602	5.91294	1.90519	1.84309e+19
TeCoO3	mp-19113	2	0.0472107	y	2.12264	0.034117	3.70028	9.37384e+18	2.23036	7.23062	3.6877	1.80624e+19
InMnF3	mp-1099572	1	0.0311785	n	2.93604	0.2768	4.69288	3.71956e+18	0.591142	2.96517	1.1301	1.642e+19
TlGeCl3	mp-998744	8	0	n	1.64013	0	3.86095	2.59469e+18	0.535093	0.302515	0.394266	1.59546e+19
MnZrO3	mp-754513	1	0.0214861	n	3.56304	0.012806	4.6814	1.05303e+19	8.42335	12.2853	10.0827	1.55248e+19
SeCdO3	mp-9186	62	0.00997629	y	3.09936	0.161074	4.63292	4.98547e+18	1.1712	6.8516	2.34494	1.50832e+19
IAgO3	mp-849271	62	0.0274699	n	1.9183	0.060232	3.8694	6.078e+18	1.06015	13.4475	2.58512	1.46273e+19
RbPbBr3	mp-998603	4	0	n	2.27648	0	4.32332	3.16772e+18	0.652614	1.26798	0.885044	1.45573e+19
YCrO3	icsd-124801	14	-	y	2.27257	0.031335	3.83498	7.74508e+18	2.98483	6.88305	4.34048	1.42567e+19
BFeO3	mp-1199904	14	0.0919414	y	1.19674	0	3.08283	9.68193e+18	6.29335	3.31555	4.45265	1.4145e+19
YCrO3	mp-18725	62	0	y	2.27906	0.02852	3.81883	8.14535e+18	3.01927	9.2276	4.88708	1.40707e+19
MnGeO3	mp-20798	148	0.0167532	y	1.94634	0.11033	3.66763	3.18907e+18	0.305893	3.56581	0.731991	1.36709e+19
BiFeO3	mp-1193035	12	0.0564113	y	1.12976	0.049434	3.11735	1.05276e+19	4.62312	7.6825	5.86457	1.35518e+19
InMnF3	mp-998241	1	0.0312298	n	2.93755	0.271582	4.78172	2.97246e+18	0.590844	2.83271	1.11375	1.34681e+19
INaO3	mp-22989	62	0	y	3.56252	0.229085	5.116	4.7117e+18	1.54939	11.9328	3.34909	1.31718e+19
BiFeO3	icsd-192515	9	-	y	1.40607	0.131657	3.60691	5.94622e+18	3.33351	2.62058	2.94496	1.24979e+19
RbGeBr3	mp-28558	33	0	y	1.86895	0	4.15328	2.19847e+18	0.833124	0.401837	0.559794	1.22039e+19
ILiO3	mp-22955	1	0.00901836	y	3.56429	0.056723	5.14228	4.61138e+18	1.80631	16.5464	4.08213	1.17366e+19
SeNiO3	mp-572987	15	0.0659638	y	3.07932	0.025554	4.10743	1.0789e+19	12.972	19.1127	15.5989	1.12203e+19
BFeO3	icsd-142855	167	-	y	1.30019	0	3.35873	5.33478e+18	1.93416	3.62233	2.58284	1.11492e+19
TlCdI3	mp-27252	62	0.016616	y	2.11192	0.01342	4.27702	3.67263e+18	0.834686	10.3785	2.02642	1.10345e+19
CsGeCl3	mp-22988	160	0	y	1.92783	0.000256	4.20092	1.84592e+18	0.907633	0.314471	0.498425	1.09839e+19
SeCaO3	mp-754140	62	0.0119277	n	4.09045	0.209299	5.67249	2.69864e+18	2.01873	2.02537	2.02205	1.07652e+19
InCaBr3	mp-28534	63	0	y	3.0803	0.167141	5.09159	2.15543e+18	0.497321	3.66546	1.06244	1.06472e+19
BFeO3	mp-19097	167	0	y	1.29885	0	3.36223	5.06073e+18	1.93898	3.58821	2.57622	1.0601e+19
SeMgO3	mp-12271	62	0	y	3.98626	0.292277	5.59682	2.96705e+18	1.81945	3.72563	2.52175	1.04572e+19
SCdO3	mp-18634	148	0.0990616	y	3.13734	0.130185	4.76236	2.77658e+18	0.770206	10.6859	1.91472	9.55611e+18
CNiO3	icsd-133659	167	-	y	3.41761	0.108587	4.64875	4.62061e+18	8.28383	3.72115	5.33563	9.29914e+18
ScCrO3	mp-18961	62	0.0368469	y	2.58786	0.077729	4.3849	3.78581e+18	2.11135	6.00213	3.32762	9.10022e+18
CoAlO3	mp-1178576	148	0.0617001	n	2.44038	0.025754	4.49514	5.10554e+18	3.95125	13.2805	6.6173	8.92164e+18
BCrO3	mp-19299	167	0	y	2.06779	0.088631	3.94674	3.61375e+18	2.73279	3.17855	2.94305	8.31376e+18
SeCoO3	mp-22616	62	0.0292571	y	2.50975	0.040315	4.15293	4.83903e+18	8.58999	4.40705	5.98461	8.21476e+18
CMnO3	mp-1271783	1	0.0299066	n	3.99165	0.082757	5.40473	2.66225e+18	1.68464	11.688	3.54021	7.6473e+18
TlFeBr3	mp-504821	62	0.053076	y	2.35121	0.24648	4.47095	2.11212e+18	1.07276	2.48514	1.56282	7.55377e+18
TlCaI3	mp-1206188	63	0.0163931	n	2.93919	0.072627	5.14585	1.813e+18	0.950452	2.92677	1.54265	7.51142e+18
CoHfO3	mp-753534	62	0.0948615	n	2.65028	0	4.29286	4.98838e+18	9.00678	8.06666	8.5173	7.33763e+18
CNiO3	mp-19147	167	0	y	3.41787	0.108634	4.64896	4.6082e+18	50.7087	3.80007	9.36878	6.99916e+18
RbPbBr3	icsd-22286	62	-	y	2.66599	0.026171	4.78478	2.09114e+18	1.30969	4.98461	2.28975	6.61227e+18
InCdBr3	mp-505222	62	0.00809931	y	2.20954	0.044834	4.47943	1.69465e+18	0.947472	2.25904	1.39608	6.42462e+18
CsPbBr3	mp-567681	62	0	y	2.64874	0.027355	4.77698	2.00952e+18	1.1237	8.99996	2.45409	6.12773e+18
ZrCoO3	mp-756665	14	0.0785098	n	2.50357	0.000282	4.12244	5.43358e+18	117.415	5.80614	15.5432	5.6816e+18
ClAgO3	mp-775761	198	0.0315842	n	2.93165	0.291656	4.85689	1.66465e+18	0.904914	8.83685	2.07739	5.60947e+18
SMnO3	mp-560522	1	0.0695583	y	4.22251	0.009725	5.46856	4.14273e+18	15.5491	18.5154	16.9353	5.50508e+18
FeCrO3	mp-1078458	2	0.00998868	y	1.55207	0.040698	3.60699	4.10335e+18	11.9941	4.84196	7.24184	5.49996e+18
ZrCoO3	mp-761293	2	0.0970649	n	2.59597	0.005239	4.10239	5.85956e+18	27.3289	17.4687	21.5783	5.1748e+18
InSnCl3	mp-998567	1	0	n	2.98016	0.192009	5.21267	1.45291e+18	4.48907	1.25276	2.1455	5.17052e+18
InSnBr3	mp-998555	161	0	n	1.78956	0.009984	4.38849	1.06996e+18	1.1369	0.626499	0.825501	5.168e+18
RbPbCl3	mp-998604	1	0	n	2.75411	0.059986	4.99742	1.04586e+18	0.840147	1.59865	1.12945	4.91798e+18
TlMnCl3	mp-570300	62	0	y	2.72374	0.259957	4.87981	1.12099e+18	0.780515	3.34085	1.41891	4.59228e+18
TlMgCl3	icsd-132285	194	-	y	4.01857	0.07005	6.1476	1.10766e+18	1.05732	8.11397	2.28328	4.50643e+18
KGeCl3	mp-998231	8	0.0282229	n	1.72922	0.00522	4.37222	6.18933e+17	0.883339	0.275067	0.453261	4.01949e+18
InMnF3	mp-1422819	160	0.0312227	n	2.92987	0.29786	5.23248	9.40481e+17	0.588316	16.2595	1.66118	3.81811e+18
TlCdCl3	mp-28218	62	0	y	3.1274	0.108312	5.38936	9.00634e+17	1.21339	2.50361	1.68702	3.73702e+18
CsPbF3	mp-5811	221	0.00443717	y	1.93246	0	4.35225	5.35586e+17	0.417035	0.370038	0.392483	3.72077e+18
RbPbF3	mp-21043	221	0.034089	y	1.99784	0	4.42369	5.31805e+17	0.456225	0.364652	0.4066	3.68939e+18
SMgO3	mp-769397	148	0.04841	n	4.96505	0.021111	6.56744	1.47756e+18	5.71063	12.9507	8.24928	3.37858e+18
RbCaI3	mp-998325	8	0.0459073	n	3.24254	0.195527	5.62763	5.7667e+17	0.367901	6.80055	0.968618	3.29744e+18
TlCaBr3	mp-1205521	63	0	n	3.53778	0.055076	5.91445	6.53814e+17	0.764845	3.44303	1.41325	3.25281e+18
CsSrI3	mp-1080232	63	0	n	3.55687	0.043065	5.97519	4.44265e+17	0.530353	2.17891	0.951254	2.72173e+18
SnLiCl3	mp-998230	1	0.0189865	n	3.89892	0.007643	6.18081	6.99293e+17	1.15676	10.7034	2.62071	2.6699e+18
CsMgI3	mp-29751	194	0	y	3.06488	0.064069	5.46538	5.3374e+17	0.83112	2.27684	1.29187	2.5665e+18
CsSrI3	mp-998417	8	0.031693	n	3.47005	0.115349	5.91142	4.19543e+17	0.378922	5.28048	0.942876	2.55411e+18
TlCdBr3	mp-28219	62	0.000583598	y	2.6958	0.015083	5.30906	4.93989e+17	0.892571	3.19193	1.52756	2.12195e+18
KSrI3	mp-1205548	63	0	n	3.47586	0	6.04541	2.84839e+17	0.347906	2.57905	0.744398	1.99583e+18
RbSrI3	mp-1205862	63	0	n	3.4877	0	6.06579	2.7508e+17	0.335287	2.28913	0.701476	1.99223e+18
CeAlO3	mp-19843	74	0	y	2.54174	0	4.83245	5.1032e+17	0.614374	8.93576	1.54251	1.98562e+18
SeCoO3	mp-562826	1	0	y	2.44134	0.010622	4.10456	4.15305e+18	114.662	56.1412	77.7287	1.93349e+18
BrNaO3	mp-23339	198	0	y	4.33849	0.004834	6.3479	1.20331e+18	12.8936	25.9525	17.7444	1.81334e+18
CsCaI3	mp-998428	62	0	n	3.34967	0	5.8861	3.36822e+17	0.850729	3.77096	1.56417	1.58521e+18
TlMgCl3	mp-1210617	62	0.0183002	n	4.0276	0.113948	6.58028	2.81004e+17	0.72523	3.73564	1.39779	1.564e+18
TlCaCl3	mp-998787	11	0	n	3.97954	0.153298	6.44605	3.49105e+17	2.11087	2.41796	2.2566	1.49804e+18
RbCaI3	mp-998592	62	0	n	3.29414	0	5.9418	2.46451e+17	0.863076	1.87143	1.22448	1.32335e+18
KCaI3	mp-1205722	63	0.0115256	n	3.29707	0.101209	5.99386	2.11563e+17	0.533657	2.09897	0.943397	1.30557e+18
CsCdBr3	mp-570231	221	0.0326752	y	0.637316	0.352227	3.67959	2.24971e+17	0.164187	2.67427	0.421816	1.27457e+18
CsMnI3	mp-540609	194	0.00220944	y	2.32108	0	5.03125	2.59379e+17	1.86566	1.53684	1.68931	1.00405e+18
CsCaI3	mp-998333	1	0.0208027	n	3.43446	0.14912	6.11531	2.29835e+17	2.40747	1.89367	2.1275	9.63607e+17
MnHfO3	mp-754657	11	0.0318619	n	2.11456	0.086821	4.76809	4.05099e+17	3.99058	4.55402	4.25836	9.3602e+17
LaFeO3	icsd-145788	167	-	y	0.914077	0.013732	3.80988	2.7774e+17	2.4703	1.21296	1.6774	8.17017e+17
ClNaO3	mp-23330	198	0.0348474	y	5.59993	0.002993	7.77368	3.77284e+17	15.7401	16.0365	15.8872	7.35819e+17
CsCaI3	mp-1213688	62	0.0102405	n	3.648	0	6.45955	1.44185e+17	1.31515	2.1656	1.66166	7.22523e+17
ClNaO3	mp-2720358	198	0.0298856	y	5.60266	0.002758	7.78182	3.701e+17	14.9545	19.9644	17.189	6.94664e+17
TlCaCl3	mp-998151	8	0.0387551	n	4.16288	0.128057	6.88646	1.3983e+17	1.07465	6.2454	2.14748	6.571e+17
CsHgCl3	mp-1197432	14	0.0180412	y	1.04513	0	4.06245	1.38625e+17	0.911294	0.79781	0.851724	6.10212e+17
TlMgF3	mp-998739	6	0	n	4.0669	0	6.82311	1.16086e+17	0.595798	99.8585	2.05368	5.52708e+17
SnLiCl3	mp-998591	161	0.00846837	n	3.38461	0.073982	6.22112	1.68854e+17	9.31168	3.06546	4.9508	4.7211e+17
RbCaBr3	mp-1209227	221	0.0236615	n	4.04071	0.226454	6.91778	6.33066e+16	0.424292	2.88276	0.886494	4.65134e+17
KCaBr3	mp-998749	8	0.0545504	n	3.90295	0.255769	6.76844	6.46957e+16	0.432135	2.99695	0.908017	4.59533e+17
RbCaBr3	mp-998198	8	0.0241587	n	4.04535	0.226595	6.9046	6.72561e+16	0.424358	6.83687	1.08786	4.45229e+17
CsCaBr3	mp-30056	221	0	y	4.46485	0.16765	7.40336	5.01709e+16	0.33598	2.44687	0.715453	4.39127e+17
TlZnF3	mp-998745	1	0	n	3.8549	0.063025	6.72549	8.35623e+16	0.608612	15.295	1.69206	4.32042e+17
CsSrBr3	mp-998297	8	0.0194297	n	4.18911	0.13142	7.08654	5.25793e+16	0.36857	8.46296	1.00914	3.70915e+17
RbCaBr3	mp-1209238	62	0	n	4.57782	0	7.56749	4.05626e+16	0.349643	5.46248	0.890807	3.25227e+17
SeMnO3	mp-22224	62	0.0202544	y	1.75801	0.091685	4.84465	1.14982e+17	2.21308	6.35333	3.5007	2.97725e+17
KCaBr3	mp-1211648	62	0.000388169	n	4.45674	0	7.46282	3.85625e+16	0.388659	5.19681	0.958625	2.9393e+17
InCrBr3	mp-28532	14	0.0499958	y	1.57097	0.020066	4.62364	1.37763e+17	6.68527	3.53605	4.74083	2.92543e+17
RbCaBr3	mp-998536	62	0.000782468	n	4.19189	0	7.1828	3.9735e+16	0.383724	6.10387	0.981187	2.88132e+17
TlCdF3	mp-1412222	8	0.00890208	n	3.82916	0.124222	6.82175	5.35537e+16	0.780729	12.2373	1.99043	2.58948e+17
CsSrBr3	mp-1213104	62	0	n	4.57566	0	7.57702	3.49056e+16	0.387771	8.52626	1.05373	2.57649e+17
CsCdBr3	mp-541899	194	0	y	2.72607	0	5.86569	3.63026e+16	0.351972	2.46822	0.741832	2.47231e+17
RbSnCl3	mp-998611	1	0	n	1.84206	0.022717	5.11903	4.39689e+16	3.2635	0.426865	0.920898	2.34546e+17
KCaBr3	mp-998599	11	0	n	4.23473	0	7.29659	3.05821e+16	0.403607	6.15007	1.0231	2.20612e+17
CsSrBr3	mp-998433	4	0.00550485	n	4.25027	0	7.32234	2.6587e+16	0.383405	3.61357	0.872582	2.08409e+17
LaFeO3	mp-22590	62	0.027772	y	0.827015	0	4.04691	7.06414e+16	2.69025	1.41001	1.8977	2.07525e+17
TlMnCl3	mp-30528	62	0.0243922	y	3.03036	0	6.21577	3.03331e+16	0.573595	1.66977	0.912015	1.97429e+17
TlCaF3	mp-1097061	8	0.0181023	n	4.37022	0.029817	7.36946	3.9935e+16	0.692238	51.3985	2.22304	1.97386e+17
TlCdF3	mp-998623	1	0.00879731	n	3.83378	0.123019	6.89463	4.07242e+16	0.78181	14.9595	2.07174	1.95073e+17
RbCrI3	mp-27442	5	0.0635656	y	1.06814	0.09633	4.28026	9.92539e+16	4.09103	8.6555	5.74655	1.77221e+17
RbCdBr3	mp-27400	62	0	y	2.66398	0.034974	5.87434	2.8434e+16	0.393026	6.19016	1.00297	1.66783e+17
CsMnCl3	icsd-2525	160	-	y	3.65345	0.115585	6.50731	5.6032e+16	2.12734	21.055	4.89954	1.64725e+17
TlCaF3	mp-998615	161	0.011281	n	4.32765	0.008076	7.4317	2.68823e+16	0.613834	16.1723	1.7199	1.52336e+17
LiMnF3	mp-859873	194	0.0925496	n	3.86618	0.007842	6.50873	3.14231e+16	0.710879	15.1517	1.92113	1.47559e+17
CsMgBr3	mp-29750	194	0	y	4.01117	0	7.18268	1.77229e+16	0.338146	2.84357	0.747863	1.47201e+17
TlMnF3	icsd-434329	221	-	y	2.42075	0.895826	5.48213	3.81462e+16	0.608562	86.6925	2.07243	1.45265e+17
CsCrI3	mp-580597	60	0.0565696	y	1.09441	0.011448	4.42016	6.46679e+16	3.93266	9.19857	5.75109	1.19193e+17
TlFeBr3	icsd-35225	1	-	y	2.65155	0.111547	5.74251	7.41905e+16	13.3565	13.5427	13.4491	1.16172e+17
CsPbF3	mp-20282	161	0	y	2.30426	0.01638	5.60925	1.54469e+16	1.19811	0.517984	0.75415	9.9774e+16
TlCdF3	mp-998759	55	0	n	3.47107	0	6.74415	1.62359e+16	0.819474	5.27607	1.68657	8.43143e+16
TlNiF3	mp-998761	221	0.010862	n	3.2574	0.1063	6.2724	4.88951e+16	11.993	15.9388	13.7562	8.26895e+16
KCaCl3	mp-998601	8	0.0456662	n	4.82512	0.281566	8.05394	8867685572337980	0.481214	4.67443	1.10329	6.79945e+16
KMnBr3	mp-29636	62	0.00132206	y	3.31152	0.15346	6.66391	9659932629458650	0.520189	8.67831	1.34277	5.55524e+16
RbSrCl3	mp-1209047	221	0.0410546	n	4.62366	0.208389	7.85936	7853278911701850	0.483265	9.96621	1.29831	5.41687e+16
KCaCl3	mp-1211589	221	0.0457332	n	4.7599	0.282483	7.99519	9000748762107920	0.477846	318.415	1.77148	5.40679e+16
CsSrCl3	mp-1213642	221	0.0128225	n	4.99554	0.183946	8.27885	6534544695075450	0.424107	8.60727	1.13608	5.07552e+16
CsSrCl3	mp-1080233	8	0.0128969	n	4.99664	0.181836	8.27783	6615823224643640	0.423398	24.1416	1.32064	4.76549e+16
RbSrCl3	mp-998755	148	0.00059384	n	5.24904	0	8.51081	6315236470239100	0.470751	14.271	1.34863	4.62821e+16
KCaCl3	mp-998421	148	0.00415963	n	5.51771	0.014234	8.80667	5886565970446050	0.475386	18.8891	1.41647	4.35582e+16
RbPbF3	mp-674508	9	0.00193866	n	2.84183	0.013837	6.2477	7262377909508650	1.87585	0.761562	1.13653	4.25608e+16
CsSrCl3	mp-1213645	127	0.00959931	n	5.17106	0.073995	8.48884	5236311297202890	0.418072	9.22318	1.13673	4.16913e+16
RbMnBr3	mp-29763	194	0.00127109	y	2.93101	0	6.24048	1.19455e+16	2.21174	5.07325	3.20948	4.16107e+16
RbCaCl3	mp-998324	161	0	n	5.21412	0.010282	8.55544	4855744987694530	0.448035	5.72469	1.09425	3.97136e+16
RbSrCl3	mp-1209111	127	0.00947096	n	4.90944	0	8.20812	5607729939489550	0.43907	29.8488	1.39689	3.89448e+16
CsVI3	mp-22991	194	0	y	2.48914	0.033037	5.81064	2.04182e+16	8.49883	10.4684	9.40677	3.86831e+16
CsCaCl3	mp-1206863	140	0.000306745	n	5.42652	0.002019	8.79486	4362760850507860	0.421872	4.57009	0.99266	3.85115e+16
CsSrCl3	mp-998561	161	0.00356382	n	5.1824	0.035185	8.50052	5155220044854660	0.436751	22.6534	1.34698	3.77583e+16
RbPbF3	mp-1540546	1	0	n	2.853	0.008972	6.26028	7180894484492360	4.67354	0.764123	1.54979	3.61108e+16
TlMnF3	mp-998762	1	0	n	2.42102	0.897709	5.79512	8158054236966950	0.608537	25.8406	1.82954	3.49525e+16
RbCaCl3	icsd-138546	62	-	y	5.37767	0.015878	8.74886	4048350313653640	0.453049	8.07535	1.18458	3.25422e+16
CsCaCl3	mp-1097916	221	0	n	5.39391	0.210704	8.74959	4643206509098180	0.555242	19.7656	1.62911	3.18295e+16
CsCaCl3	mp-1096927	1	0.00029149	n	5.39354	0.20874	8.75739	4451958793350240	0.472394	52.8572	1.57726	3.10437e+16
KCaCl3	mp-1211643	62	0	n	5.54562	0	8.93111	3757875676989740	0.466697	22.3222	1.42493	2.81159e+16
MnLiF3	mp-1176635	63	0.0670142	n	4.40509	0.125449	7.63315	4517368301679620	0.559224	40.3083	1.79031	2.57707e+16
RbSrCl3	icsd-138559	62	-	y	5.27684	0	8.65266	3573133253239160	0.471207	39.2209	1.53085	2.49881e+16
RbSrCl3	mp-1209174	11	0.0021211	n	5.26823	0	8.64645	3510951522574790	0.479174	35.138	1.53681	2.4488e+16
CsSrCl3	mp-1213084	62	0	n	5.28888	0.050809	8.68523	3228262922318560	0.460033	14.8681	1.33079	2.4305e+16
CMnO3	mp-1078473	2	0.0302994	y	2.46172	0.002096	5.86095	1.08947e+16	6.76495	13.3774	9.2419	2.1004e+16
CsCdCl3	mp-568544	221	0.00747212	y	1.7075	0.414697	5.27541	2923962644404150	0.251441	8.41819	0.731188	1.8039e+16
RbVI3	mp-672346	185	0.0222281	y	2.5288	0.013089	5.9728	9660467084683040	35.3189	9.75296	16.764	1.40925e+16
CsMnBr3	mp-23048	194	0	y	3.0398	0	6.52498	3767785700041150	2.40438	4.77284	3.28996	1.35541e+16
TlMnCl3	mp-570290	221	0.0293078	y	2.63797	0.739361	6.28343	1309271718604040	0.394058	12.0555	1.1305	7737337492820684
CsMgCl3	mp-23004	194	0	y	5.15001	0	8.73504	687825288033916	0.393247	3.73925	0.896924	6344028984438318
CsCdCl3	mp-619015	194	0	y	2.46176	0	6.11913	871380232662686	0.36336	5.50985	0.920161	5558598934181098
TlVCl3	mp-1206817	194	0.000823192	n	1.76736	0.005917	5.42816	1220643664810470	1.30866	3.67206	2.05252	4624846188905865
RbCdCl3	mp-23390	62	0	y	3.54669	0.077758	7.21379	578738065062504	0.496762	11.9859	1.37169	3564648029208595
RbCrI3	mp-676553	12	0.0675368	n	0.985552	0.003998	4.73385	1465208097930930	5.2432	2.95057	3.8531	3533528534153014
KCdCl3	mp-23442	62	0	y	3.50416	0.116086	7.22004	331049477352519	0.4866	7.1193	1.22321	2.16114e+15
RbMgCl3	mp-27208	194	0	y	4.74965	0	8.44664	196492771978526	0.418623	3.30922	0.911117	1.73878e+15
LiMnF3	mp-1176631	51	0.0344124	n	3.41581	0	7.00554	272090025907615	0.619424	3.83509	1.26073	1697633108553059
CsMnCl3	mp-23336	166	0	y	3.40777	0.111618	7.10477	300659444748271	2.40096	16.303	5.01561	9.53813e+14
RbMgCl3	mp-662499	194	0.00424359	y	4.59115	0	8.34339	8.4396e+13	0.381569	3.99751	0.890811	746056544534310
KMgCl3	mp-27865	62	0.0028086	y	4.48308	0	8.25199	8.07506e+13	0.488496	3.85223	1.06252	6.46453e+14
TlNiCl3	mp-1205652	194	0.0019757	n	2.87205	0.042202	6.7224	8.01072e+13	2.21294	5.40359	3.29132	2.96832e+14
LiMnF3	mp-777298	60	0.0486796	n	3.69308	0.086889	7.40378	4.12459e+13	0.772601	13.1997	2.00363	2.15737e+14
KCrF3	mp-1180767	140	0.00274024	n	1.61283	0.00219	5.4609	5.26482e+13	1.8529	5.31365	2.9298	1.67969e+14
LiVF3	mp-753024	194	0.0916307	n	2.2166	0.004746	5.92356	2.66163e+13	0.727771	4.5263	1.48316	1.2946e+14
LiVF3	mp-777894	52	0.0275805	n	2.73933	0	6.489	2.50803e+13	0.6633	35.3846	2.05265	1.13593e+14
NaVF3	mp-20572	221	0.0913499	y	0.758307	1.20629	4.5678	7.31339e+12	0.575617	32.5463	1.79367	2.49433e+13
KFeBr3	mp-23348	62	0.0516097	y	2.99453	0.075684	6.94167	4.36428e+12	26.4307	5.12872	9.88644	9.63509e+12
RbMnBr3	mp-568231	185	0	n	2.89688	0	6.86076	1.30796e+12	1.72873	3.98625	2.51383	5.65977e+12
NaMnCl3	mp-27176	148	0.00683853	y	4.1218	0.046929	8.08743	1.15761e+11	0.394339	10.9167	1.11376	8.8711e+11
LiMnF3	mp-760095	147	0.0938096	n	2.91124	0	6.78163	8.50202e+10	0.725242	133.611	2.5165	3.63461e+11
TlHgF3	mp-998758	55	0	n	2.06103	0	6.15754	1.04071e+10	2.16616	2.5242	2.33492	4.19371e+10
LiVF3	mp-777676	15	0.0702716	n	2.51886	0.016877	6.4446	4.3547e+09	0.755874	97.9846	2.55498	1.75574e+10
LiMnF3	mp-753025	182	0.0844203	n	3.65862	0.065982	7.58372	1.99871e+09	0.705655	14.074	1.88429	1.10422e+10
RbVBr3	mp-29314	185	0	y	2.70797	0.051007	6.7892	5.39532e+08	13.6958	7.82983	10.1557	1.14942e+09
KMnCl3	mp-567530	62	0	y	4.03845	0.10738	8.08685	2.75932e+08	1.81251	15.4037	4.01949	1.113e+09
RbVBr3	mp-568136	165	1.86107e-05	y	2.70061	0.046082	6.78222	5.19108e+08	12.83	9.01078	10.6686	1.07789e+09
LiVF3	mp-782665	61	0.0535132	n	2.60019	0.000621	6.5686	7.40966e+07	0.611938	82.2841	2.07452	3.37919e+08
RbVBr3	mp-570099	194	0.000337827	y	2.61496	0.061928	6.71284	1.02628e+08	13.9141	14.597	14.2494	1.82505e+08
KVCl3	mp-1205604	194	0	n	2.49209	0.034486	6.5681	4.3041e+07	7.43125	3.18331	4.65164	1.31075e+08
LiMnF3	mp-764783	62	0.0905801	n	2.80804	0	6.78619	2.1666e+06	0.673595	1.42149	0.945191	1.51232e+07
VAlO3	mp-1178549	2	0.0198159	n	1.97971	0.000448	0	1.91149e+20	35.7329	62.4912	46.3437	0
ZnCoO3	mp-758652	148	0.0819296	n	0.788692	0.208754	0	2.26858e+21	3.59203	4.21258	3.88378	0
SiVO3	mp-754608	15	0.0187299	n	1.6013	0.106058	0	6.89069e+19	0.459003	20.0277	1.38494	0
AgCuF3	mp-1188802	2	0.0173621	y	0.795182	0.025497	6.94571	0	2.52373	26.6319	5.90195	0
AgNiF3	mp-998365	221	0.0517297	n	1.9224	0.561974	7.11347	0	0.452689	29.8614	1.4355	0
AgNiF3	mp-998429	63	0.0254682	n	1.81526	0.14714	6.87511	0	0.491276	4.78286	1.12697	0
TlCoCl3	mp-569753	194	0.0101247	y	1.82279	0	6.69004	0	3.13982	8.57082	4.87387	0
TlCoCl3	mp-567620	1	0.00771441	y	1.72036	0.005965	6.62432	0	3.01598	4.92716	3.79742	0
TlCoCl3	mp-2353285	12	0.00427613	n	1.62308	0	6.5929	0	2.88227	5.85841	3.98265	0
CsCoCl3	mp-504708	194	0	y	1.60276	0	6.92642	0	2.49858	4.89424	3.39999	0
CsCrCl3	mp-29616	12	0.0679255	y	1.74162	0.017014	6.93465	0	6.03363	11.6247	8.15378	0
CsCuCl3	mp-23032	20	0	n	1.12991	0.014594	7.0752	0	15.6317	9.67906	12.1255	0
CsCuCl3	mp-2456411	1	0.00274534	n	1.08407	0.023235	7.06901	0	5.49229	6.14847	5.8065	0
CsFeCl3	mp-29400	194	0	y	2.62556	0.006133	8.62315	0	24.3035	5.03815	9.51533	0
CsMnF3	mp-558702	194	0	y	3.54448	0	8.33798	0	0.509585	8.7884	1.32396	0
CsNiCl3	mp-22950	194	0	y	3.25392	0	8.48527	0	45.9188	5.60742	12.3171	0
CsNiBr3	mp-1080570	194	0	y	2.39073	0	7.02537	0	25.6223	4.72875	9.25501	0
CsNiF3	mp-611601	194	0.0947646	n	4.5773	0.020154	8.61981	0	0.600281	9.9323	1.547	0
CsNiF3	mp-1194078	194	0.0286103	y	4.68035	0	10.8018	0	215.007	15.5967	38.7205	0
CsNiF3	mp-557772	194	0	y	5.47576	0.024051	10.6473	0	47.3645	11.9934	21.2308	0
CsNiF3	mp-505492	166	0.00741919	y	5.0012	0	10.8553	0	79.539	28.3697	44.4819	0
CsVCl3	mp-22977	194	0	y	2.58336	0.03633	6.88891	0	9.77541	3.29184	5.27255	0
CsVBr3	mp-23038	194	0	y	2.65625	0.053015	7.00802	0	9.02245	15.8903	11.7371	0
TlHgF3	mp-998710	1	0.0130245	n	1.79942	1.3311	6.47923	0	0.732113	26.5293	2.15353	0
KCoCl3	mp-1001793	161	0.0873905	n	1.65099	0	6.96452	0	2.30569	1.09717	1.53692	0
KCrF3	mp-1180782	12	0.00252088	y	1.61174	0.001024	6.67551	0	2.01746	5.59895	3.1512	0
KCrF3	mp-556365	12	0	y	1.73772	8.3e-05	6.61766	0	2.17533	6.05207	3.40095	0
KCrF3	mp-560547	12	0.00490523	n	1.74395	0.000139	6.95539	0	2.2279	6.01563	3.44412	0
KCrF3	mp-566131	123	0.0268132	y	0.761239	1.4465	5.16538	0	1.49014	1.20764	1.33778	0
KCuF3	mp-3682	140	0.00238764	y	1.1698	0.079174	10.131	0	1.64514	2.00627	1.81229	0
KCuF3	mp-5566	127	0.00219855	n	1.17395	0.160948	10.1238	0	1.38286	1.696	1.52747	0
KCuF3	mp-669347	69	0	y	1.82678	0.193227	9.90545	0	5.55888	1.81155	2.93652	0
KCuF3	mp-1080828	127	0.0037641	y	1.17275	0.159232	10.1225	0	1.38176	1.74499	1.54752	0
KFeCl3	mp-23538	62	0.031317	y	3.43078	0.0665	8.49033	0	29.3408	15.7271	20.9675	0
KMnCl3	mp-23049	62	0.0128935	y	3.13037	0	7.94307	0	0.44857	1.61744	0.769885	0
KMnF3	mp-1180807	62	0.000830872	n	2.81989	0.000195	7.23641	0	0.539528	3.13272	1.07786	0
KMnF3	mp-558046	62	0	y	2.83884	0.00018	7.20535	0	0.540312	4.47145	1.19007	0
KMnF3	mp-555123	221	0.00224353	y	2.6951	2.53248	7.33374	0	0.510358	18.4626	1.50087	0
KMnF3	mp-555359	140	0.000179502	y	2.83308	0.000359	7.38098	0	0.523435	1.8138	0.886057	0
KMnF3	mp-560382	127	0.00134673	y	2.70623	0.000493	7.09565	0	0.537588	1.70181	0.8813	0
KMnF3	mp-1205353	74	0.000273249	y	2.82902	0	7.75864	0	0.418296	1.54502	0.723887	0
KMnF3	mp-1180746	140	0.00174122	n	2.82045	0	7.38648	0	0.549617	1.60065	0.874028	0
KMnF3	mp-644332	11	0.00166128	y	2.81175	0	7.18372	0	0.542788	2.75024	1.04089	0
KNiCl3	mp-27366	185	0	y	3.14079	0.006719	8.24906	0	28.079	6.81459	12.2346	0
KNiF3	mp-560976	221	0	y	4.48529	0.191046	11.0728	0	1506.55	26.566	82.8107	0
KVF3	mp-557257	221	0	y	2.19886	0.927744	6.43899	0	0.549716	40.519	1.764	0
LiAgF3	mp-757915	1	0.071213	n	0.252091	0.034035	6.61446	0	7.95929	8.09117	8.02482	0
LiAgF3	mp-760151	178	0.0562919	n	0.105688	0.07123	6.49014	0	8.55685	6.41343	7.36966	0
AgLiF3	mp-756821	14	0.0728436	n	0.020826	0	6.16624	0	13.7297	6.31337	8.96769	0
LiAgF3	mp-752605	15	0.0510486	n	0.31454	0.006839	6.29237	0	3.14681	3.7955	3.44839	0
CoLiF3	mp-759500	1	0.0880069	n	2.80984	0.004844	10.0836	0	339.379	265.19	298.862	0
LiCuF3	mp-760814	38	0.0725878	n	1.71513	0	9.68168	0	27.2906	12.5892	17.859	0
LiCuF3	mp-761262	1	0.029487	n	2.35272	0.009797	11.0997	0	17.1633	16.0454	16.5902	0
LiCuF3	mp-761897	178	0.0413975	n	2.20915	0.026489	10.8872	0	27.3544	29.8207	28.5476	0
LiFeF3	mp-754707	15	0.05925	n	3.01895	0	7.8206	0	0.669235	316.997	2.44691	0
LiFeF3	mp-777888	1	0.0362697	n	3.18034	0.008698	9.80936	0	0.609066	23.6667	1.80922	0
LiFeF3	mp-755103	12	0.0975543	n	3.16678	0.020877	9.318	0	0.620539	29.8287	1.89583	0
LiFeF3	mp-776077	14	0.0408456	n	3.07486	0.000308	9.17043	0	0.774391	458.109	2.85774	0
LiFeF3	mp-780803	61	0.0391843	n	3.07095	0.000365	8.9573	0	0.585099	240.385	2.1255	0
LiFeF3	mp-1176705	63	0.0690037	n	2.91224	0	9.10461	0	0.622291	13.1512	1.67917	0
LiFeF3	mp-1176706	57	0.0334557	n	2.98322	0	9.45024	0	0.620927	13.9947	1.69461	0
LiFeF3	mp-755575	62	0.0955572	n	3.16366	0.346939	9.4749	0	0.978136	10.4968	2.29649	0
LiFeF3	mp-754581	62	0.0819608	n	2.93789	0.447995	9.54032	0	0.697517	7.37706	1.63206	0
LiFeF3	mp-754816	62	0.0394821	n	3.20624	0.004515	9.62003	0	0.592693	17.9807	1.69817	0
LiFeF3	mp-761166	9	0.0239755	n	3.27501	0.021617	9.80252	0	0.577105	99.0108	1.99256	0
FeLiF3	mp-755136	63	0.087769	n	3.32593	0.313839	8.34294	0	12.1551	5.99543	8.27563	0
LiFeF3	mp-1176709	198	0.056107	n	2.87725	0	9.75788	0	0.870257	21.6587	2.41557	0
LiFeF3	mp-777622	1	0.0515322	n	3.26258	0.016249	8.66968	0	0.678889	202.373	2.42635	0
LiFeF3	mp-777899	62	0.0671695	n	3.13434	0	8.47779	0	0.678901	35.1025	2.09298	0
LiFeF3	mp-756113	2	0.0438896	n	2.90649	0.031338	9.619	0	0.674122	182.448	2.39631	0
LiFeF3	mp-776080	56	0.0283753	n	3.33496	0	10.032	0	0.717833	51.5818	2.29734	0
LiFeF3	mp-776017	60	0.0506295	n	3.0588	0	8.84134	0	0.777824	213.143	2.7669	0
LiFeF3	mp-1176698	1	0.0359197	n	3.36485	0.089596	10.1091	0	0.760833	31.9436	2.28396	0
LiFeF3	mp-780639	11	0.031662	n	3.163	0	9.5392	0	0.915152	17.6682	2.42911	0
LiFeF3	mp-777522	36	0.0229207	n	3.16415	0.278629	9.69314	0	0.572199	11.0022	1.51766	0
FeLiF3	mp-756109	62	0.0633377	n	3.14446	0.000849	8.95584	0	0.565473	40.6833	1.80996	0
LiFeF3	mp-777672	1	0.0691466	n	3.1351	0.033546	9.43628	0	0.608658	29.0332	1.85773	0
MnLiF3	mp-776156	198	0.0457147	n	3.48577	0.167451	8.31392	0	0.606476	13.4575	1.65068	0
LiMnF3	mp-777972	33	0.0272502	n	3.55984	0	8.07644	0	0.712444	29.4253	2.134	0
LiMnF3	mp-754676	182	0.0244891	n	3.75207	0.273839	8.63383	0	0.577444	4.2306	1.23162	0
LiMnF3	mp-765457	62	0.0396612	n	3.08083	0	7.67365	0	0.626901	1.86572	1.00492	0
LiMnF3	mp-777352	61	0.0386231	n	3.68463	0.083392	8.07108	0	0.57328	25.3717	1.73297	0
LiMnF3	mp-778819	38	0.0752988	n	3.34309	0.056752	7.77995	0	0.608713	5.00557	1.33853	0
LiMnF3	mp-1176636	63	0.075517	n	3.34677	0.056688	7.65406	0	0.620911	4.88337	1.34958	0
LiMnF3	mp-1176632	62	0.0438976	n	3.12251	0	7.95072	0	0.589634	2.21921	1.02696	0
LiMnF3	mp-752938	167	0.0341083	n	3.28581	0.00426	8.10944	0	0.588834	2.78431	1.10515	0
LiMnF3	mp-752829	148	0.0403923	n	3.88681	0.080015	8.49598	0	0.607342	20.0731	1.76278	0
MnLiF3	mp-776951	62	0.0390418	n	3.82174	0.135981	8.70103	0	0.545598	5.44381	1.25903	0
LiMnF3	mp-1176630	15	0.0296157	n	3.70581	0.132035	8.17281	0	0.622888	23.4899	1.84259	0
MnLiF3	mp-778697	62	0.0527481	n	3.99994	0.000117	8.03767	0	0.641314	71.8652	2.14154	0
LiMnF3	mp-759093	52	0.0294548	n	3.7809	0.086029	8.23858	0	0.642402	11.5902	1.68357	0
LiMnF3	mp-759492	14	0.0396625	n	3.68419	0.081668	7.95162	0	0.705075	32.8237	2.14536	0
LiMnF3	mp-777655	12	0.058516	n	4.11651	0.007637	8.93463	0	0.643094	16.3205	1.79083	0
LiMnF3	mp-777355	56	0.0212362	n	3.68616	0.010295	8.52362	0	0.715736	10.383	1.79603	0
LiMnF3	mp-756130	163	0.0662574	n	3.70925	0.037325	8.11236	0	0.65366	88.4908	2.21715	0
LiNiF3	mp-758501	148	0.0155647	n	5.01521	0.001377	10.8308	0	9.17672	2.67607	4.51345	0
LiVF3	mp-752911	62	0.0357913	n	2.61988	0	7.17178	0	0.669587	11.4153	1.73576	0
LiVF3	mp-752607	148	0.0450841	n	2.68794	0.235469	7.20212	0	0.622125	15.8326	1.73324	0
VLiF3	mp-778509	198	0.0711594	n	2.73884	0.020267	7.36464	0	0.632192	190.669	2.2609	0
LiVF3	mp-752764	161	0.0185088	n	2.73065	0	7.20076	0	0.635434	20.0074	1.83098	0
LiVF3	mp-777551	198	0.0371581	n	2.82684	0.023488	7.51323	0	0.651933	57.171	2.12881	0
LiVF3	mp-777893	56	0.0211545	n	2.79143	0	7.3476	0	0.697553	12.2169	1.81773	0
NaCoF3	mp-1078336	63	0.0182716	y	2.32475	0.020898	9.91905	0	3.36791	12.3225	5.80949	0
NaCoF3	mp-21404	62	0	y	2.7493	0	9.59894	0	11.2989	10.042	10.6427	0
NaCuF3	mp-505085	2	0.00120379	n	1.6803	0.01749	10.0347	0	2.7846	5.94948	3.92707	0
NaFeF3	mp-505066	62	0	y	2.90853	0.010694	9.12231	0	0.535367	28.0326	1.65302	0
NaFeF3	mp-1078217	63	0.00969247	y	2.92324	0.213433	9.14555	0	0.515444	16.8666	1.49384	0
NaMnF3	mp-560242	62	0	y	2.80961	0	7.70278	0	0.53853	2.15673	0.957772	0
NaNiF3	mp-561480	62	0	y	4.78991	0	10.1176	0	9.19257	3.86154	5.6864	0
NaNiF3	mp-1078237	63	0.0129988	y	5.13628	0.008481	10.4716	0	10.2072	3.45882	5.52726	0
NaVF3	mp-1120756	62	0	n	2.20411	0	6.48506	0	0.551252	9.89376	1.44325	0
RbCoCl3	mp-27707	194	0.00214401	y	1.76095	0	6.57684	0	2.7638	7.5058	4.28189	0
RbCoBr3	mp-1206319	194	0.0162177	n	1.25786	0	6.70262	0	2.73125	4.37956	3.41082	0
RbCoBr3	mp-1209578	158	0.0640494	n	1.27007	0	6.79376	0	2.59102	3.89109	3.14261	0
RbCrCl3	mp-30027	15	0.0195885	y	1.90013	0.065066	6.79209	0	10.2154	29.3164	16.1569	0
RbCrCl3	mp-568864	5	0.0215716	y	2.02044	0.033779	7.08156	0	16.4742	22.6456	19.1933	0
RbCrCl3	mp-568887	12	0.0282901	y	1.73764	0.017742	6.91606	0	6.33227	9.41413	7.64555	0
RbCuCl3	mp-23055	60	0.0197524	y	0.961912	0	7.01668	0	7.88953	6.02819	6.86523	0
RbCuCl3	mp-568857	15	0.0222707	y	0.970131	0.08609	6.97016	0	4.42753	6.40157	5.27885	0
RbCuCl3	mp-571305	5	0.0219111	y	0.971444	0.091207	6.01459	0	4.78735	7.3098	5.84988	0
RbCuF3	mp-8858	69	0	y	2.0859	0.167765	10.1148	0	6.86663	2.21423	3.60304	0
RbCuF3	mp-554601	123	0.00953047	n	0.16419	0.369474	8.62128	0	1.57936	1.29737	1.42799	0
RbMnCl3	mp-569309	194	0	y	3.31805	0.013473	7.47083	0	1.31082	3.37723	1.9905	0
RbMnF3	mp-558749	221	0	y	2.99477	2.474	7.71142	0	0.47308	69.5838	1.61501	0
RbNiCl3	mp-23486	194	0	y	3.16378	0.013377	8.24582	0	23.5434	6.01313	10.6138	0
RbNiBr3	mp-27409	194	0	y	2.30111	0.020048	6.79215	0	41.4159	2.98022	7.41136	0
RbNiF3	mp-556488	194	0	y	4.8073	1e-06	10.5213	0	153.687	19.0233	41.6396	0
RbVCl3	mp-23319	194	0	y	2.5235	0.055199	6.7309	0	7.50459	3.20288	4.68707	0
RbVF3	mp-556424	221	0	y	2.53707	0.545327	6.78127	0	0.499704	23.683	1.52394	0
LaFeO3	icsd-29118	221	-	y	0.404085	1.15523	0	4.06516e+20	1.80255	61.2998	5.25385	0
RbCuBr3	icsd-137722	20	-	y	0.468608	0.151546	5.1753	0	5.14151	8.31754	6.44581	0
RbCuCl3	icsd-255843	20	-	y	0.346083	0	6.41507	0	1.91308	10.6895	3.77881	0
KCuF3	icsd-139065	25	-	y	0.104471	1.10765	9.03005	0	1.44439	1.25039	1.34215	0
KCuF3	icsd-182857	140	-	y	1.21921	0.080742	10.125	0	1.639	2.06676	1.83432	0
KCuF3	icsd-27689	123	-	y	0.139248	0.377782	8.74756	0	1.67448	1.28027	1.4576	0
KCuF3	icsd-87496	61	-	y	1.10559	0	9.98468	0	1.54532	2.79182	2.03232	0
KMnF3	icsd-31499	140	-	y	2.79974	0	7.48213	0	0.514233	2.08254	0.917962	0
