# Supplementary material for: A novel strategy for discovering inorganic solar-cell absorbers: leveraging octahedral features in ABX 3 structures
Source: Royal Society of Chemistry journal article supplement (doi:10.1039/d4ta07938h), 2025-01-01
Supplement: d4ta07938h3.pdf [file d4ta07938h3.pdf]

## Supplementary Information

### A Novel Strategy for Discovering Inorganic Solar-Cell Absorbers: Leveraging Octahedral Features in $ABX_3$ Structure

Wonze Jung<sup>1,2</sup>, Suim Lim<sup>1,3</sup>, Yong Youn<sup>1</sup>, Jiho Lee<sup>4</sup>, Awet Mana Amare<sup>5</sup>, Shah Syed Fawad<sup>5</sup>, Inyoung Jeong<sup>5</sup>, Donghyeop Shin<sup>5</sup>, Joo Hyung Park<sup>5</sup>, Kihwan Kim<sup>5</sup>, and Kanghoon Yim<sup>1\*</sup>

<sup>1\*</sup>Energy AI and Computational Science Laboratory, Korea Institute of Energy Research, Daejeon, 34129, Korea.

<sup>2</sup>Department of Physics, Chungnam National University, Daejeon, 34134, Korea.

<sup>3</sup>Department of Mechanical Engineering, Sogang University, Seoul, 04107, Korea.

<sup>4</sup>Department of Materials Science and Engineering, Seoul National University, Seoul, 08826, Korea.

<sup>5</sup>Photovoltaics Research Department, Korea Institute of Energy Research, Daejeon, 34129, Korea.

\*E-mails: kyjung1020@kier.re.kr, khyim@kier.re.kr

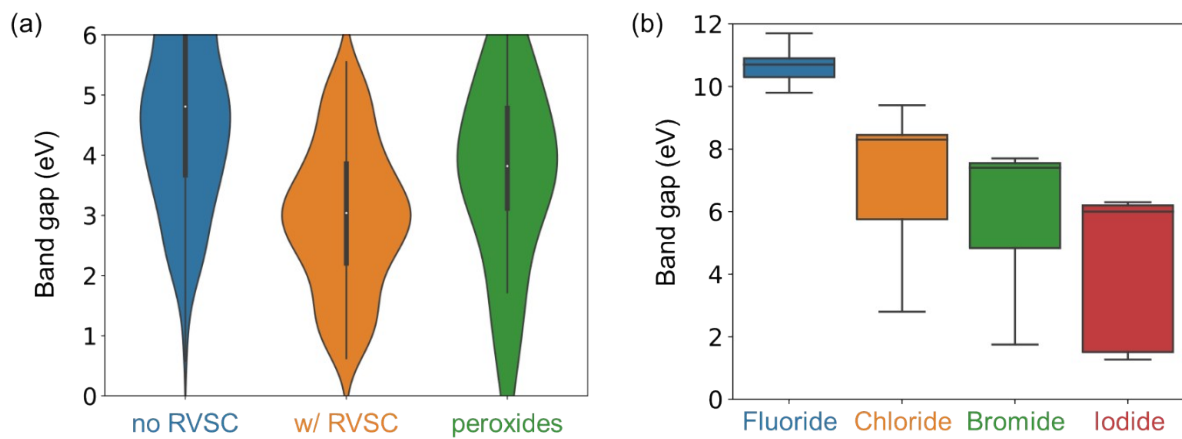

**Figure S1.** (a) The violin plot for calculated band gap distribution of binary and ternary oxides from ref. [1]. (b) The box plot of experimental band gap distribution for fluorides, chlorides, bromides, and iodides from ref. [2-8].

(a)

① Corner 100%

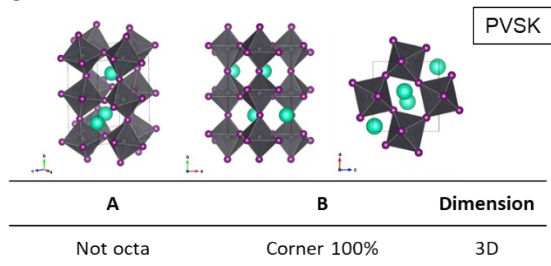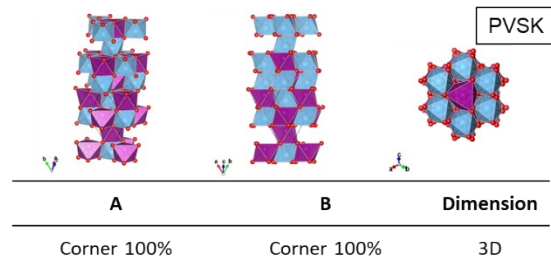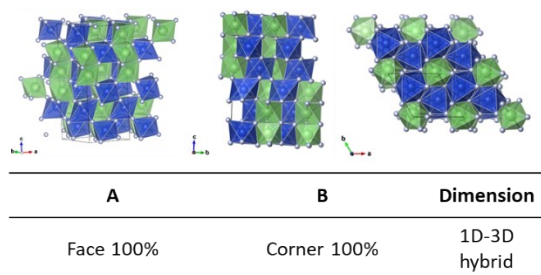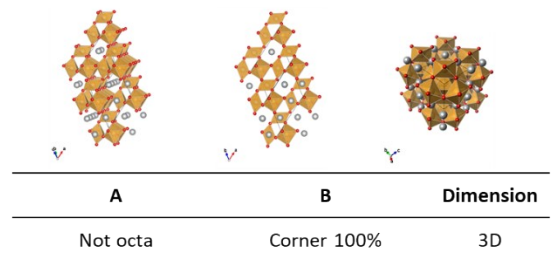

(b)

① Corner + Edge

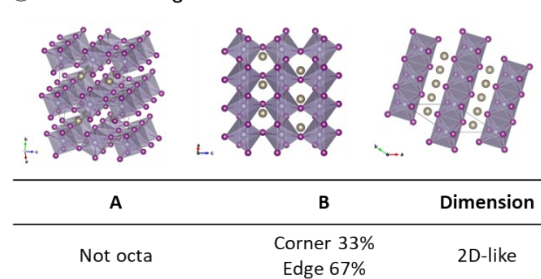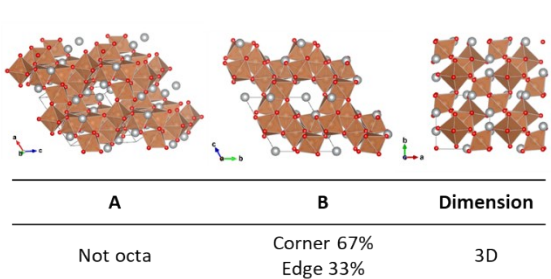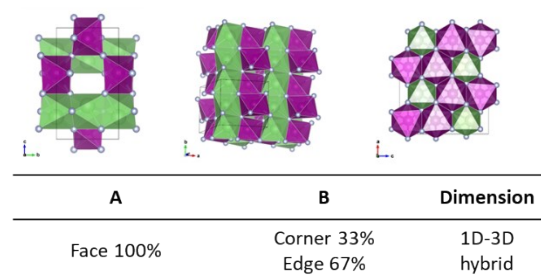

(c)

② Corner + Face

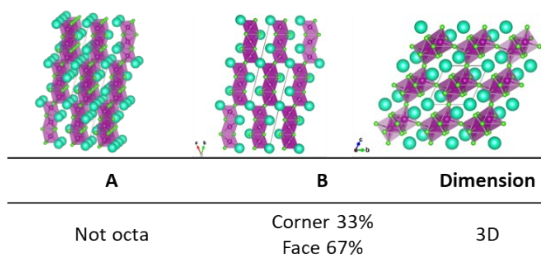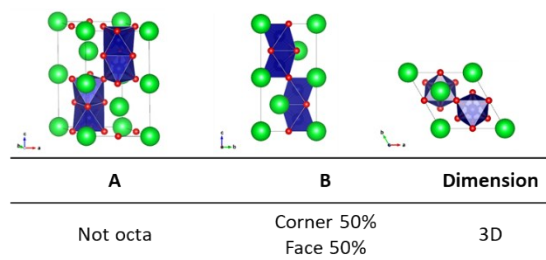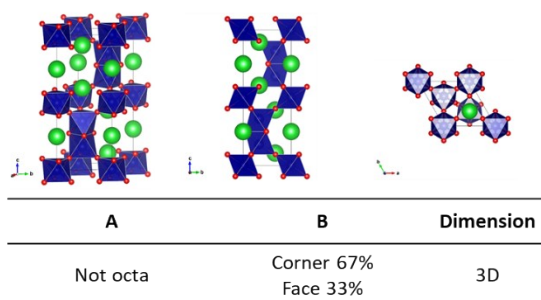

(d)

③ Edge 100%

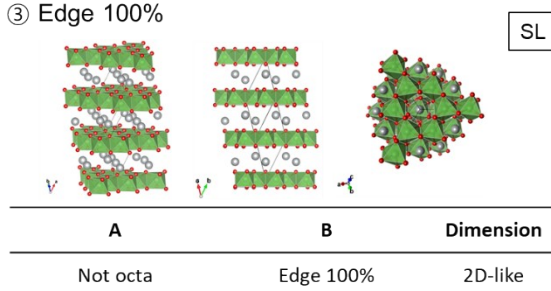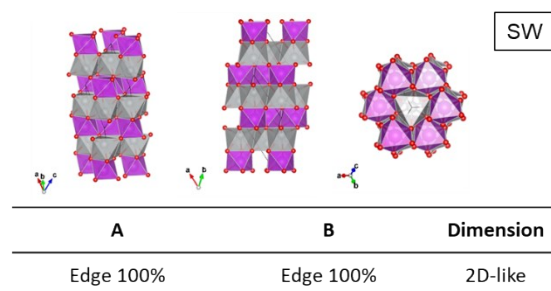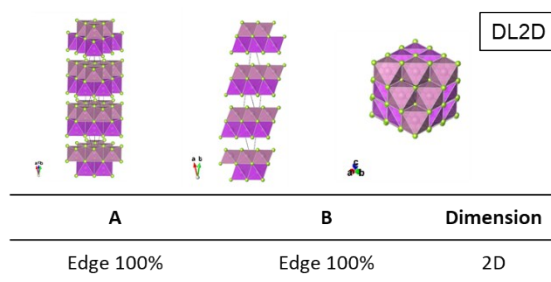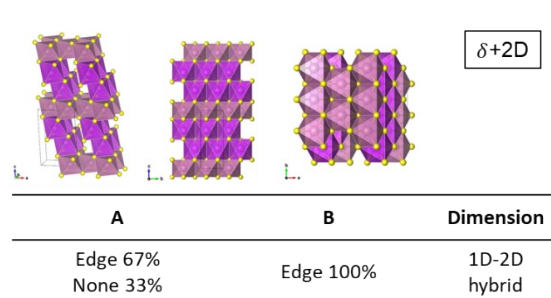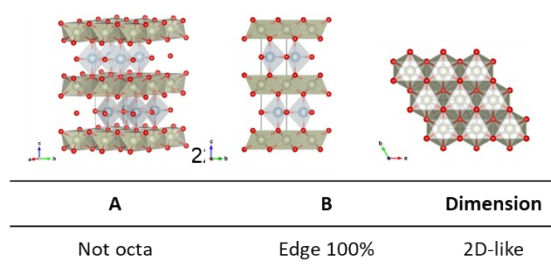

(e)

④ Edge + none

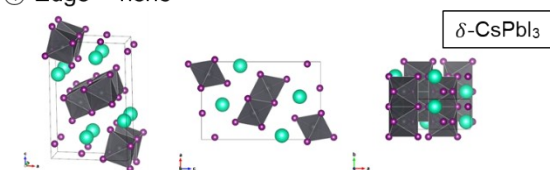

| A        | B                    | Dimension |
|----------|----------------------|-----------|
| Not octa | Edge 67%<br>None 33% | 1D-like   |

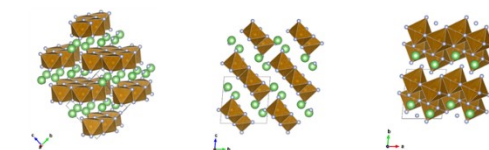

| A        | B                    | Dimension |
|----------|----------------------|-----------|
| Not octa | Edge 67%<br>None 33% | 1D-like   |

(f)

⑤ Face 100%

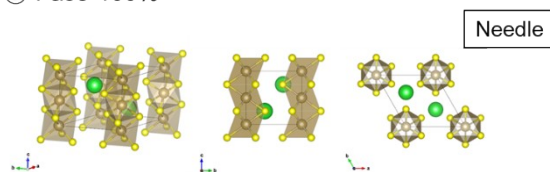

| A        | B         | Dimension |
|----------|-----------|-----------|
| Not octa | Face 100% | 1D-like   |

**Figure S2.** Representative types of structures based on octahedral interconnections and dimension. The structures consist of (a) only corner sharing, (b) corner and edge sharing, (c) corner and face sharing, (d) only edge sharing, (e) edge and none sharing, and (f) only face sharing are shown

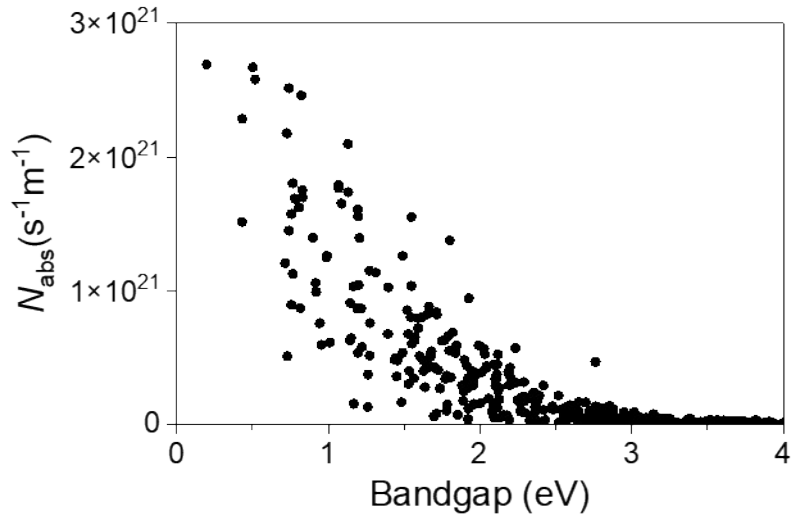

**Figure S3.** Relation of light absorption to band gaps

**Table S1.** Decomposition energies of chalcogenide materials to competitive phases.

| Material            | Competitive phases                                                                                       |                       | Decomposition E (meV/atom) |            |
|---------------------|----------------------------------------------------------------------------------------------------------|-----------------------|----------------------------|------------|
|                     | Formula                                                                                                  | ICSD ids              | GGA                        | SCAN       |
| SbBiSe <sub>3</sub> | $\frac{1}{2}\text{Bi}_2\text{Se}_3 + \frac{1}{2}\text{Sb}_2\text{Se}_3$                                  | 617072, 651516        | -19                        | -266       |
| InSbSe <sub>3</sub> | $\frac{1}{2}\text{In}_2\text{Se}_3 + \frac{1}{2}\text{Sb}_2\text{Se}_3$                                  | 4478, 651516          | <b>+37</b>                 | <b>+33</b> |
| SbYTe <sub>3</sub>  | $\frac{1}{2}\text{Y}_2\text{Te}_3 + \frac{1}{2}\text{Sb}_2\text{Te}_3$                                   | 653174, 185952        | -25                        | -40        |
| InBiSe <sub>3</sub> | $\frac{1}{2}\text{In}_2\text{Se}_3 + \frac{1}{2}\text{Bi}_2\text{Se}_3$                                  | 4478, 617072          | <b>+2</b>                  | <b>+11</b> |
| LaSbSe <sub>3</sub> | $\frac{1}{10}\text{La}_{10}\text{Se}_{19} + \frac{11}{30}\text{Sb}_2\text{Se}_3 + \frac{4}{15}\text{Sb}$ | 69730, 651516, 651489 | -19                        | -122       |
| BiInS <sub>3</sub>  | $\frac{1}{2}\text{In}_2\text{S}_3 + \frac{1}{2}\text{Bi}_2\text{S}_3$                                    | 151644, 30775         | <b>+2</b>                  | -10        |

(c) CsSnI<sub>3</sub> (mp-616378)

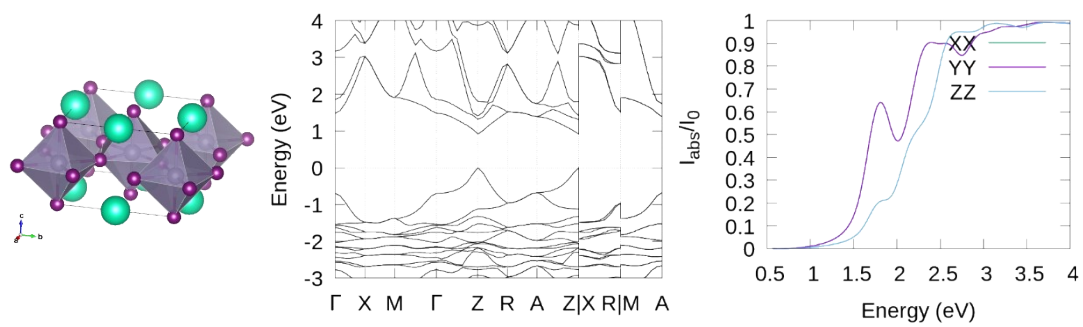

(d) CsPbI<sub>3</sub> (mp-1069538)

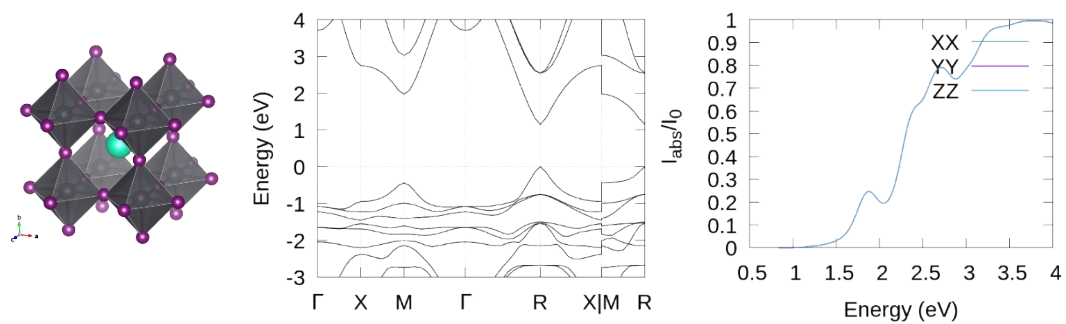





(a)  $\text{RbGeI}_3$  (mp-571458)

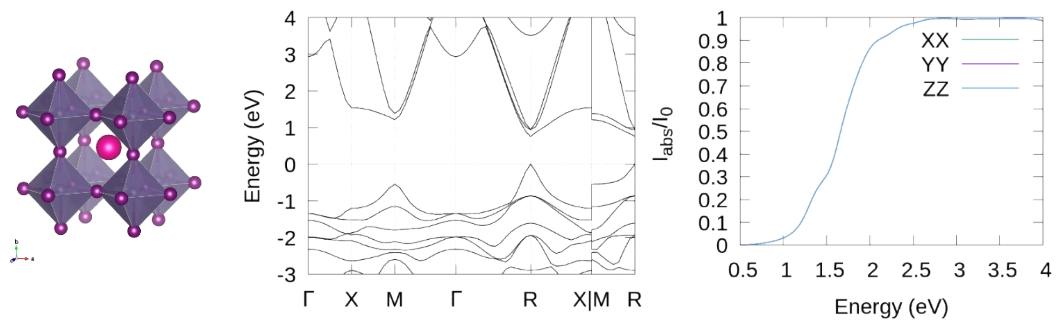

(b)  $\text{CsSnI}_3$  (mp-568570)

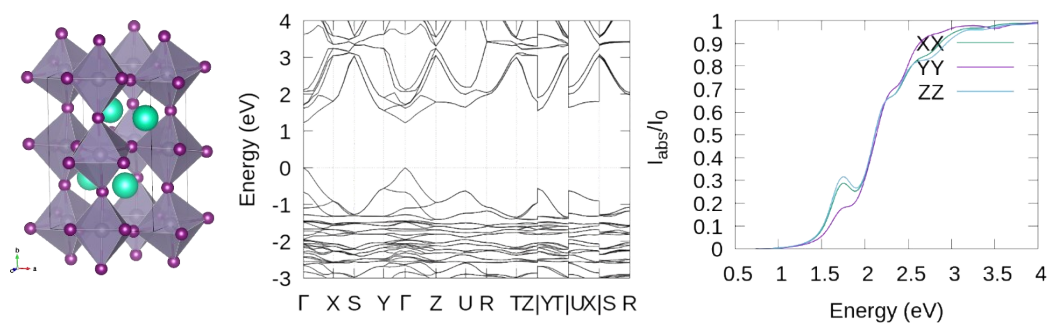











(e) CsSnBr<sub>3</sub> (mp-27214)

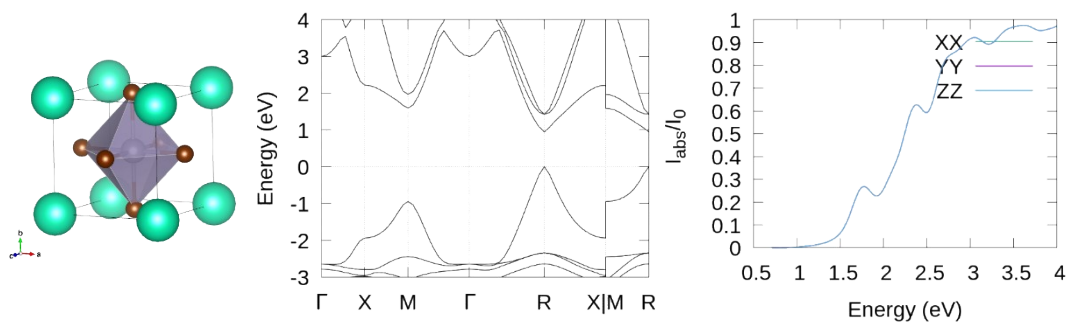

(f) CsGeI<sub>3</sub> (mp-28377)

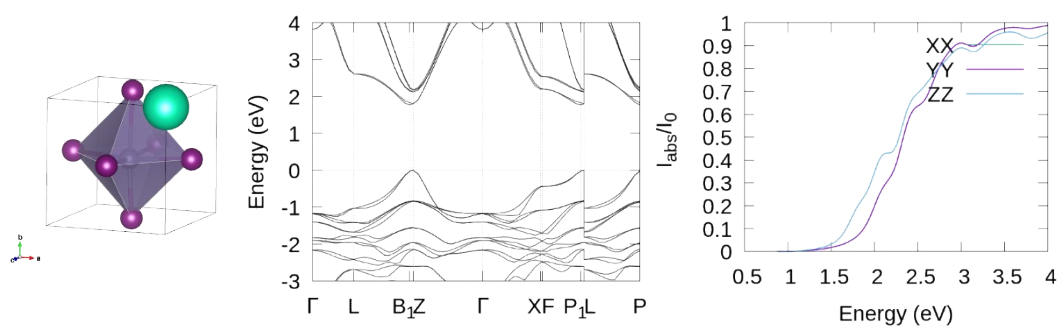

(g) RbSnBr<sub>3</sub> (mp-998157)

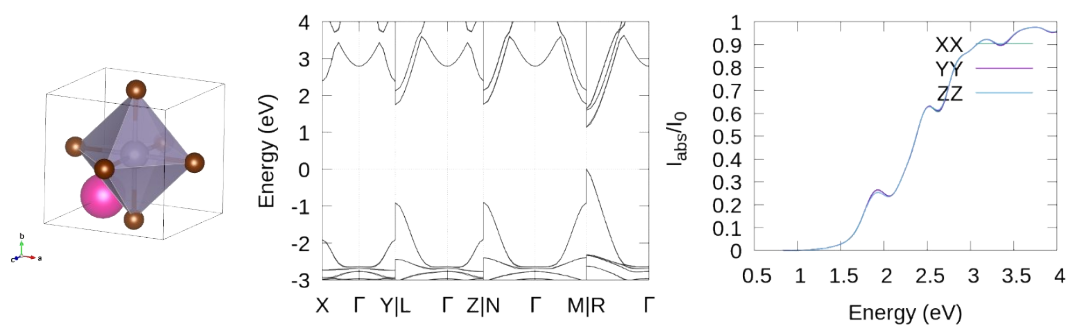

(h) CsSnI<sub>3</sub> (mp-614013)

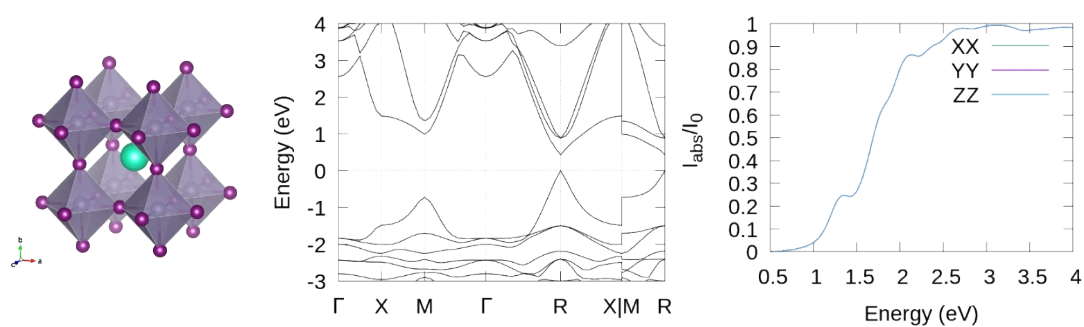





(i) CsGeI<sub>3</sub> (mp-642690)

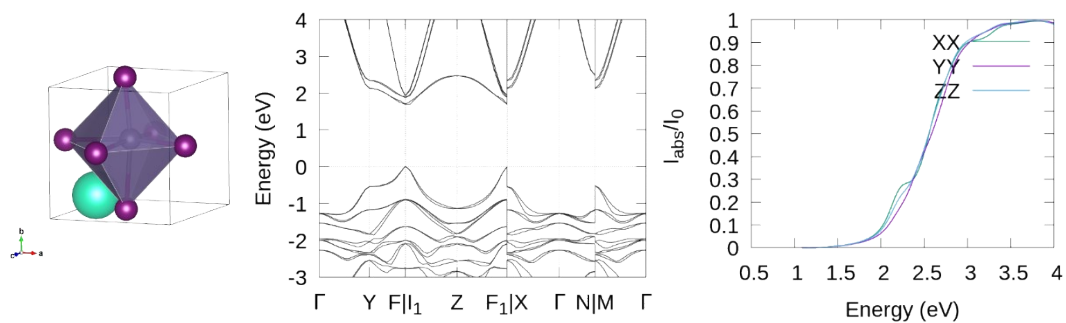

(j) LaSbSe<sub>3</sub> (mp-1222966)

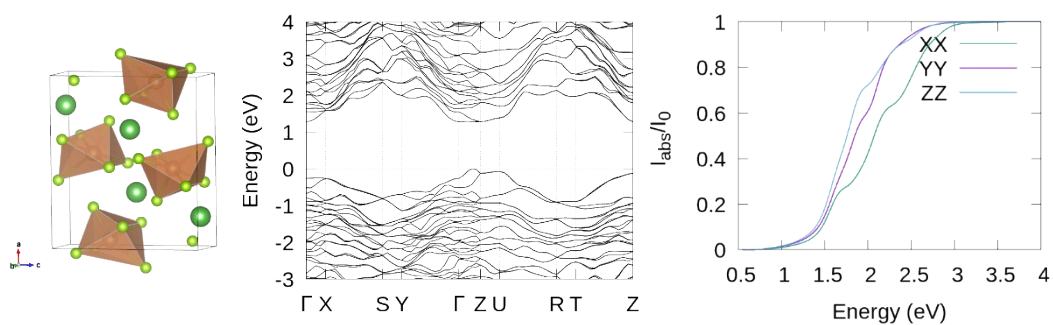

(k) BiInS<sub>3</sub> (mp-1078776)

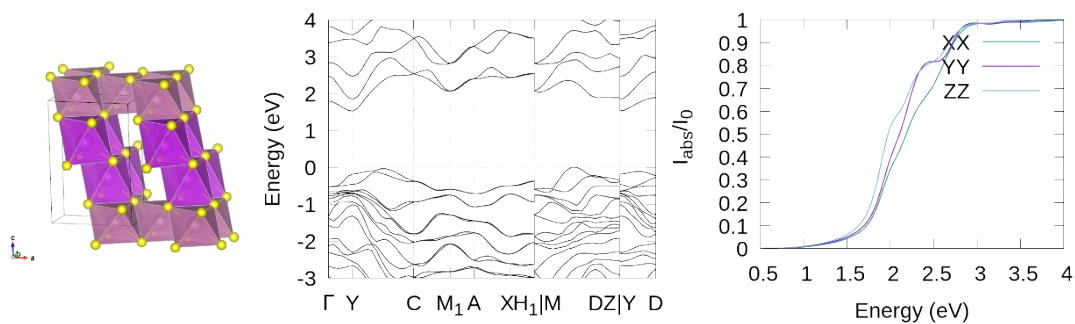

(l) SrZrS<sub>3</sub> (mp-5193)

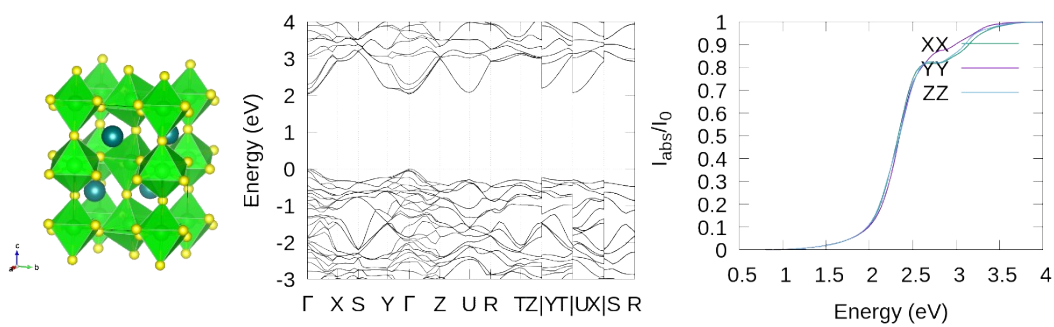



(m)  $\text{LaCrS}_3$  (mp-10328)

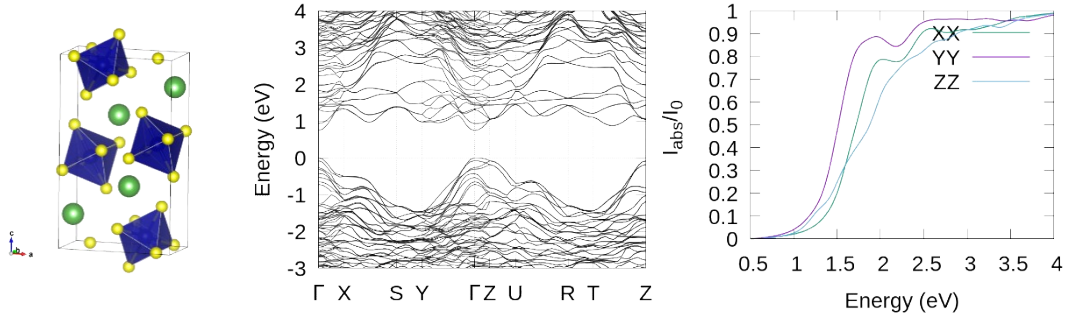

(n)  $\text{CeCrS}_3$  (mp-21871)

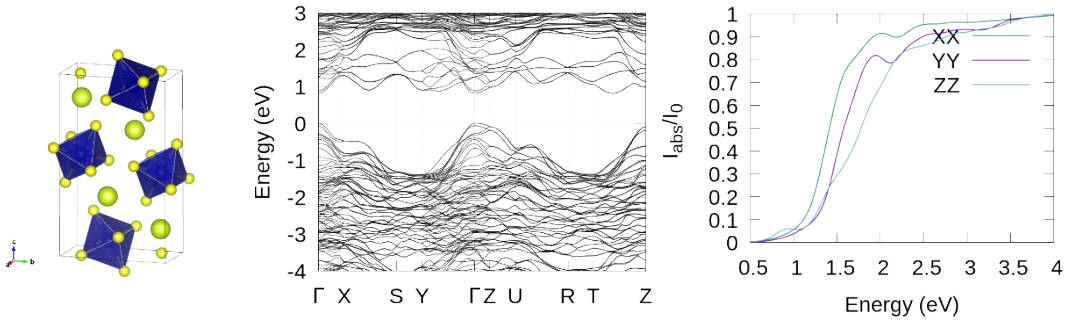

(o)  $\text{TiTaSe}_3$  (mp-12027)

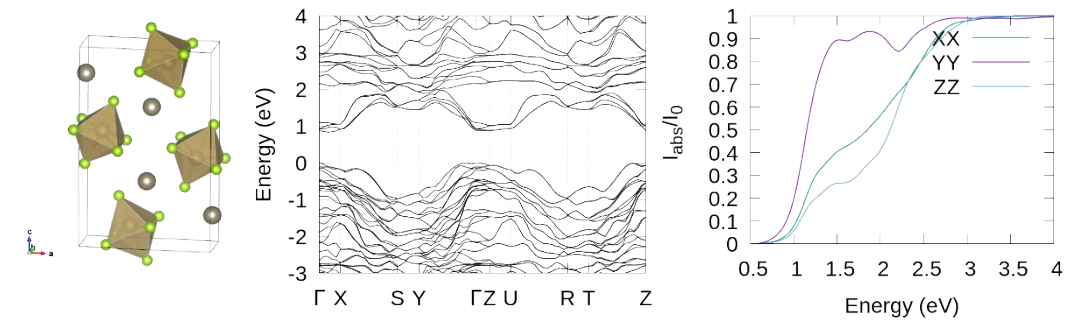

(p)  $\text{SrCoO}_3$  (mp-505766)

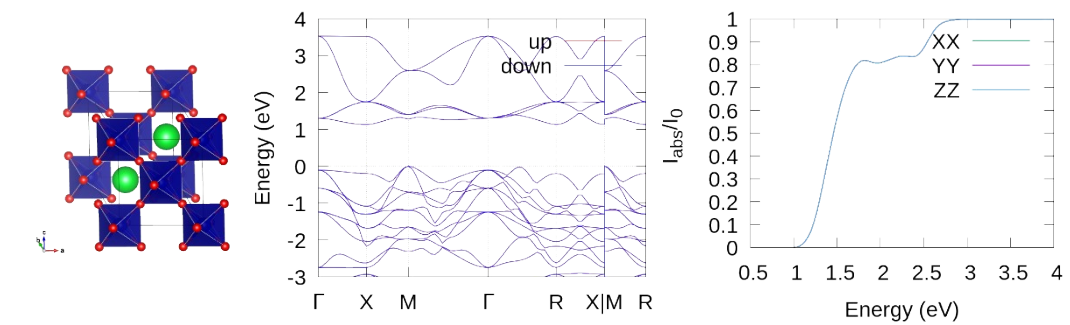

**Figure S4.** DFT results for unit-cell structure, band structures, and absorptivities of top 20 candidate materials with highest figure of merit (FoM); (a)  $\text{RbGeI}_3$  (mp-571458), (b)  $\text{CsSnI}_3$  (mp-568570), (c)  $\text{CsSnI}_3$  (mp-616378), (d)  $\text{CsPbI}_3$  (mp-1069538), (e)  $\text{CsSnBr}_3$  (mp-27214), (f)  $\text{CsGeI}_3$  (mp-28377), (g)  $\text{RbSnBr}_3$  (mp-998157), (h)  $\text{CsSnI}_3$  (mp-614013), (i)  $\text{CsGeI}_3$  (mp-642690), (j)  $\text{LaSbSe}_3$  (mp-1222966), (k)  $\text{BiInS}_3$  (mp-1078776), (l)  $\text{SrZrS}_3$  (mp-5193), (m)  $\text{LaCrS}_3$  (mp-10328), (n)  $\text{CeCrS}_3$  (mp-21871), (o)  $\text{TiTaSe}_3$  (mp-12027), and (p)  $\text{SrCoO}_3$  (mp-505766).

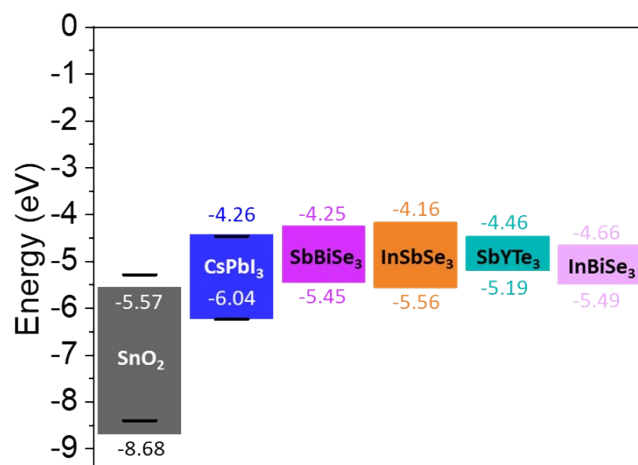

**Figure S5.** Band edge positions of SnO<sub>2</sub>, CsPbI<sub>3</sub>, SbBiSe<sub>3</sub>, InSbSe<sub>3</sub>, SbYTe<sub>3</sub>, and InBiSe<sub>3</sub>. Following the methodology of previous study<sup>[9]</sup>, the bandgap centers relative to the vacuum level were calculated at the GGA level. The VBM and CBM positions were then corrected using experimental band gaps(SnO<sub>2</sub><sup>[10]</sup> and CsPbI<sub>3</sub><sup>[11]</sup>) or HSE06 band gaps(SbBiSe<sub>3</sub>, InSbSe<sub>3</sub>, SbYTe<sub>3</sub>, and InBiSe<sub>3</sub>). The black lines are experimental band edge positions in previous literatures<sup>[10,11]</sup>.

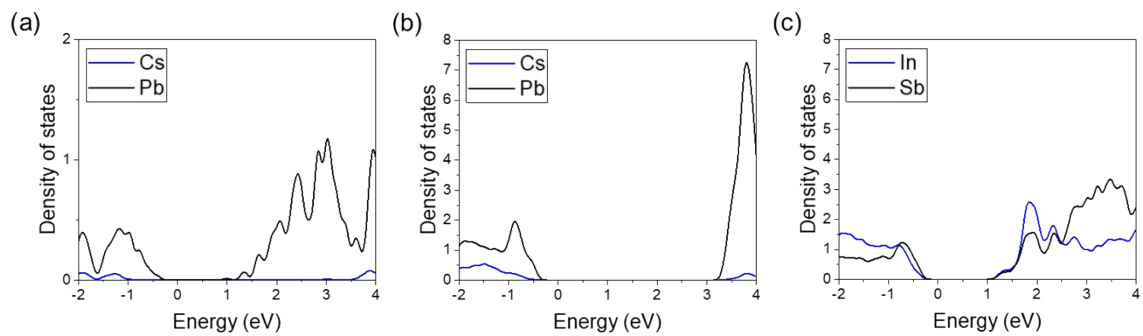

**Figure S6.** Projected density of states (PDOS) of cations for (a)  $\alpha$ -CsPbI<sub>3</sub>, (b)  $\delta$ -CsPbI<sub>3</sub>, and (c) InSbSe<sub>3</sub>. The PDOS calculations were performed using the GGA functional, with band gap corrections using the HSE06 functional.

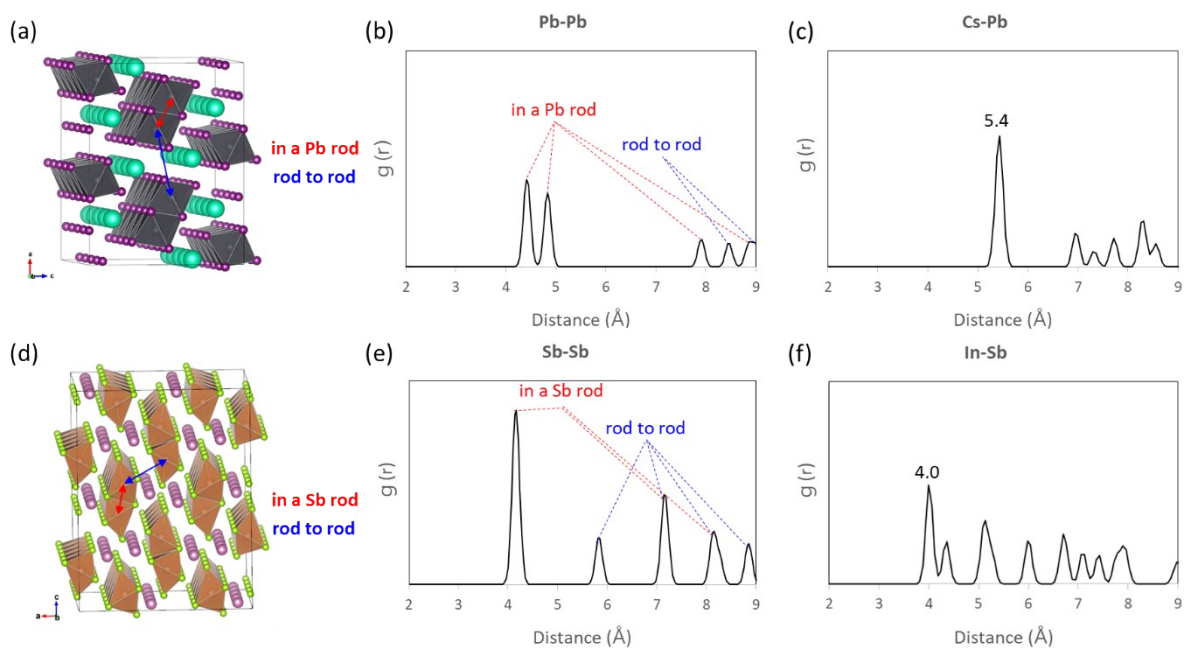

**Figure S7.** Partial pair distribution functions (PDFs) for (a) Pb-Pb and (b) Cs-Pb in  $\delta$ -CsPbI<sub>3</sub>, and (c) Sb-Sb and (d) In-Sb in InSbSe<sub>3</sub>.

To further clarify the underlying reasons behind the differing trends in terms of octahedral interconnections between halides and chalcogenides, we have conducted a detailed comparisons between two representative materials, CsPbI<sub>3</sub> and InSbSe<sub>3</sub>. This study aimed to understand why InSbSe<sub>3</sub>, which has a similar octahedral structure to  $\delta$ -CsPbI<sub>3</sub>, exhibits promising photovoltaic properties, while CsPbI<sub>3</sub> loses its excellent characteristics through a phase transition from the  $\alpha$  to  $\delta$  phase.

First, projected density of state (PDOS) of  $\alpha$ -CsPbI<sub>3</sub>,  $\delta$ -CsPbI<sub>3</sub>, and InSbSe<sub>3</sub> (Fig. S6) reveals that Cs shows no contribution to the band-edge states in both  $\alpha$ -, and  $\delta$ -CsPbI<sub>3</sub>. In contrast, both In and Sb in InSbSe<sub>3</sub> significantly contribute to the band-edge states. Due to the 1D-like octahedral interconnections of PbI<sub>3</sub> in  $\delta$ -CsPbI<sub>3</sub>, the A-site cations (Cs) act as barriers to charge transport between the PbI<sub>3</sub> octahedral rods. Whereas, in InSbSe<sub>3</sub>, both In and Sb function as transport paths for each other, facilitated by their joint contribution to the band edge states.

Secondly, we focused on the structural differences between  $\delta$ -CsPbI<sub>3</sub> and InSbSe<sub>3</sub>. Despite the similarity in their octahedral interconnections, which contain BX<sub>3</sub> 1D rods, the two structures are precisely distinct. The partial pair distribution functions (PDFs) indicate that closest Sb-Sb distances between two adjacent SbSe<sub>3</sub> rods in InSbSe<sub>3</sub> are much closer than Pb-Pb distances across PbI<sub>3</sub> rods in  $\delta$ -CsPbI<sub>3</sub>, ( $\sim 5.9$  Å vs.  $\sim 8.4$  Å, see Fig. S7(b,e)) Refer to the Cs-Pb and In-Sb PDFs in each materials (as shown in Fig. S7(c,f)), we could infer these differences primarily arise from the relative sizes of the A cations (Cs vs. In).

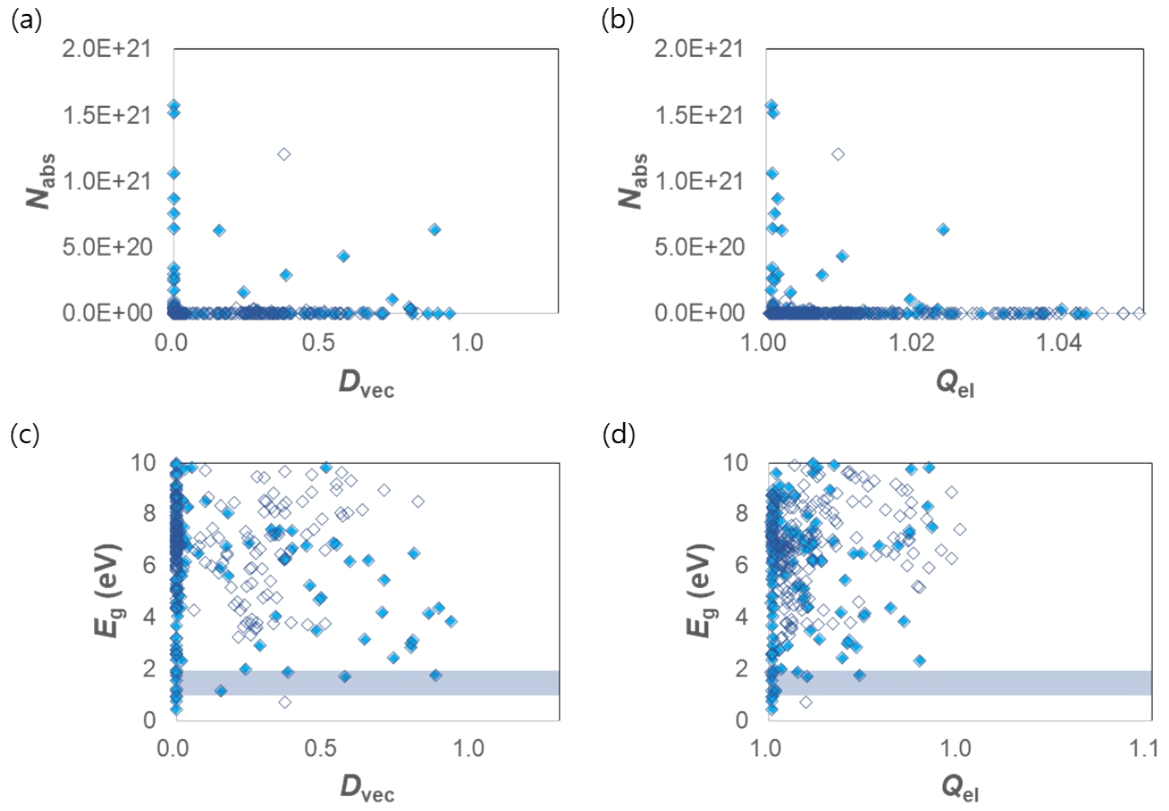

**Figure S8.** Distribution of light absorptions in total halides (unfilled symbol) and fully corner-sharing halides (filled symbol) according to the (a) distortion vector index ( $D_{vec}$ ), and (b) quadratic elongation ( $Q_{el}$ ). Distribution of band gap in the same materials according to (c)  $D_{vec}$ , and (d)  $Q_{el}$ .

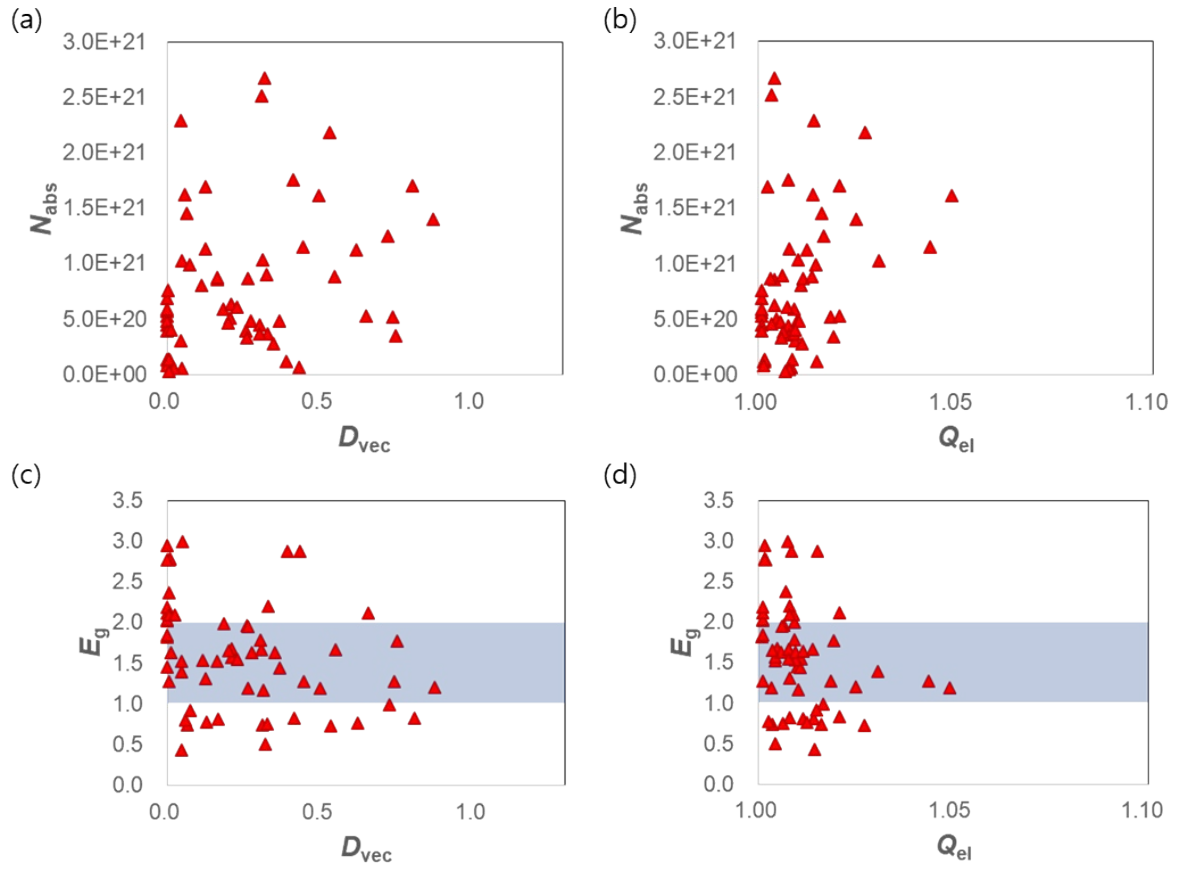

**Figure S9.** Distribution of light absorptions in chalcogenides according to the (a) distortion vector index ( $D_{\text{vec}}$ ), and (b) quadratic elongation ( $Q_{\text{el}}$ ). Distribution of band gap in the same materials according to (c)  $D_{\text{vec}}$ , and (d)  $Q_{\text{el}}$ .



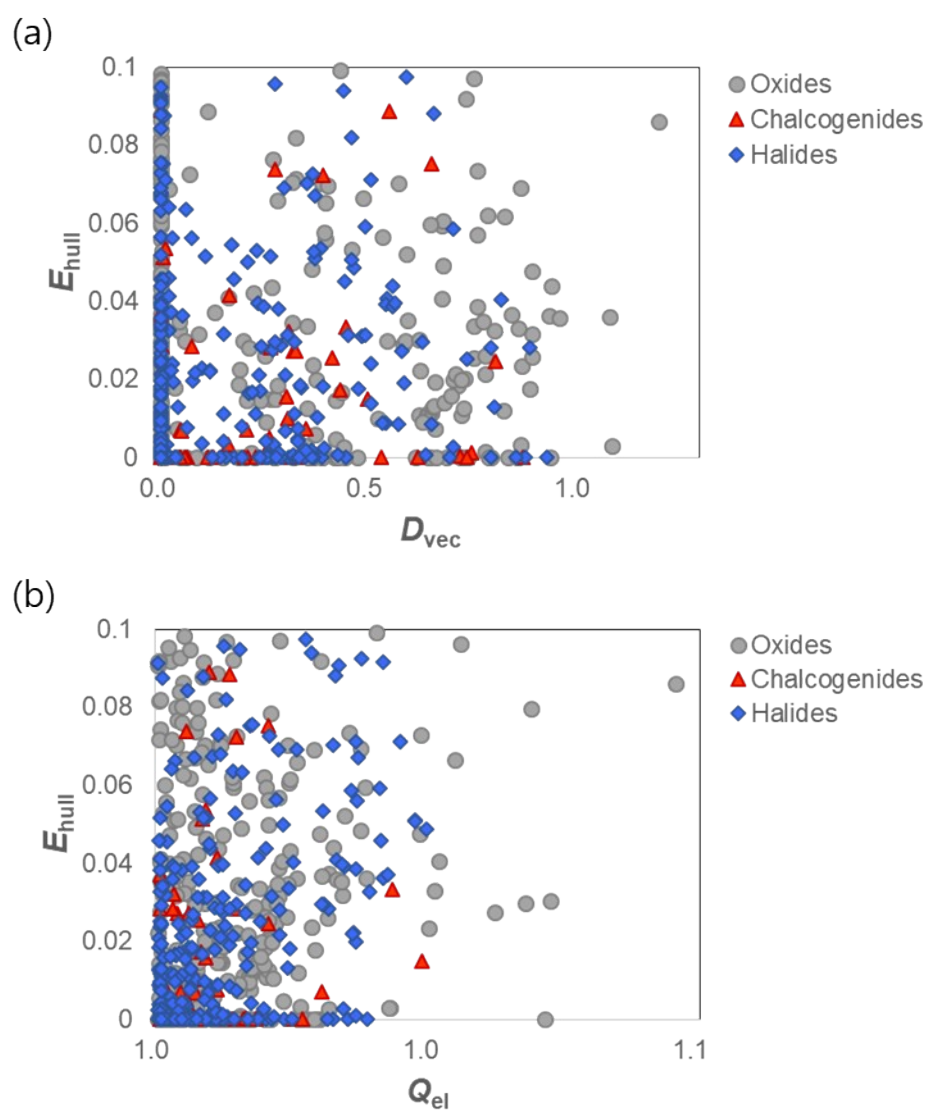

**Figure S10.** Energy above hull distribution according to (a) distortion vector index ( $D_{\text{vec}}$ ), and (b) quadratic elongation ( $Q_{\text{el}}$ ).

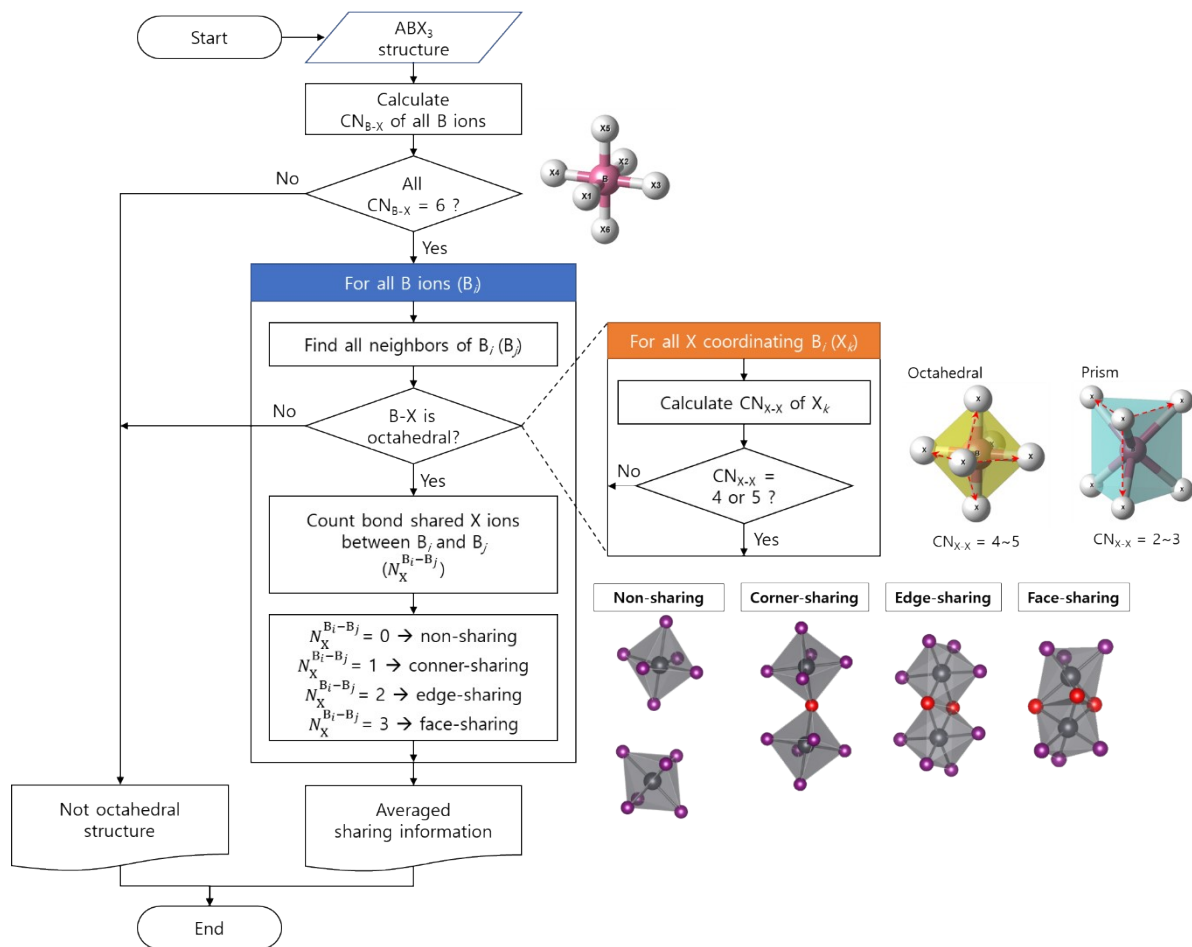

**Figure S11.** The Flowchart of our in-house code for detecting octahedral structures and classifying their interconnections.



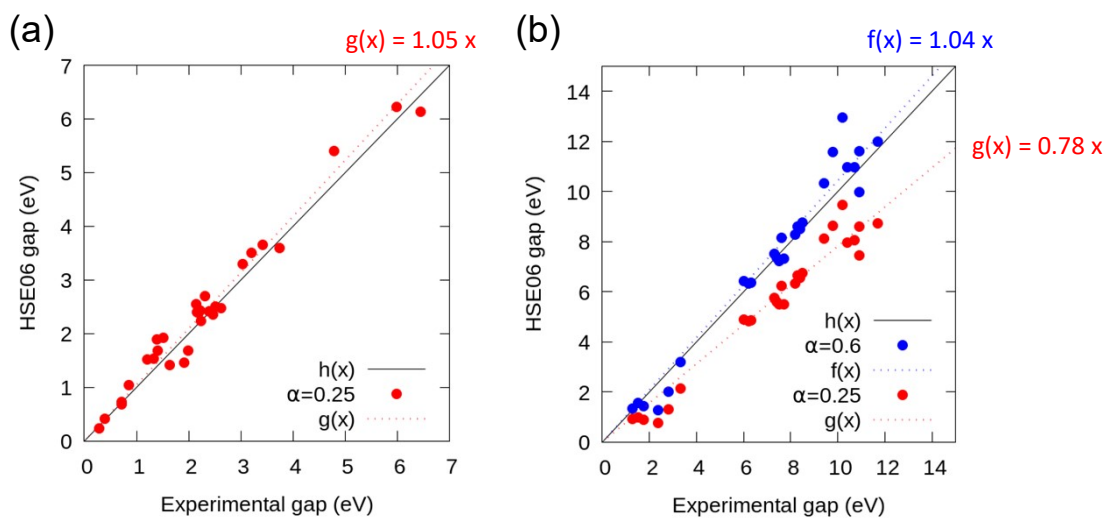

**Figure S13.** Comparison between theoretical and experimental band gaps<sup>[2-8]</sup> for (a) compounds with group IV, V, and VI anions, and (b) halides. In halides, the hybrid mixing ratio  $\alpha = 0.6$  gives more accurate prediction for experimental band gaps.

Reproduced by Wonze, J., (2022). *First-principles study of perovskite solar cells for long-term stability* [Unpublished master's thesis]. Chungnam National Univ.

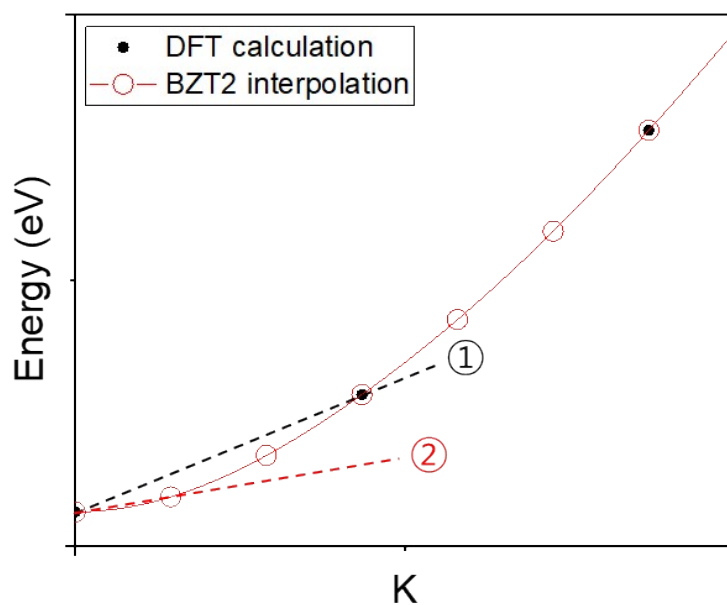

**Figure S14.** Schematic E-K diagram comparing DFT calculation results and their BZT2 interpolation results. ① represents an extension connecting the first and second points of the DFT results, while ② represents extension of BZT2 interpolation results.

## Appendix. Practical mean of electron and hole effective masses

Given that ionized defect scattering is dominant in crystalline semiconductors, the relationship between the conductivity  $\sigma$  and effective mass  $m^*$  is approximately as follows<sup>[12,13]</sup>:

$$\sigma \propto \frac{1}{\sqrt{m^*}} \quad (\text{Eq. S1})$$

Since the conductivity  $\sigma$  is a function of electron mobility  $\mu_e$ , and hole mobility  $\mu_h$  and they are also inversely proportional to  $\sqrt{m^*}$  as below,

$$\sigma = en\mu_e + ep\mu_h \quad (\text{Eq. S2})$$

$$\mu \propto \frac{1}{\sqrt{m^*}} \quad (\text{Eq. S3})$$

practical mean of electron and hole effective mass can be defined as follows:

$$\mu_{mean} \equiv \frac{\mu_e + \mu_h}{2} \propto \frac{\frac{1}{\sqrt{m_e^*}} + \frac{1}{\sqrt{m_h^*}}}{2} \quad (\text{Eq. S4})$$

$$m_{mean}^* \equiv \left( \frac{2\sqrt{m_e^* m_h^*}}{\sqrt{m_e^*} + \sqrt{m_h^*}} \right)^2 \quad (\text{Eq. S5})$$

Considering the Eq. S1, the practical mean of effective masses  $m_{mean}^*$  is applied to FoM in inversed square root form.

## References

- [1] K. Yim, Y. Yong, J. Lee, K. Lee, H.-H. Nahm, J. Yoo, C. Lee, C. Seong Hwang and S. Han, *NPG Asia Mater.*, 2015, **7**, e190–e190.
- [2] J. Heyd, J. E. Peralta, G. E. Scuseria and R. L. Martin, *J. Chem. Phys.*, 2005, **123**, 174101.
- [3] J. Paier, R. Asahi, A. Nagoya and G. Kresse, *Phys. Rev. B*, 2009, **79**, 115126.
- [4] C. R. Gopikrishnan, D. Jose and A. Datta, *AIP Adv.*, 2012, **2**, 012131.
- [5] L.-y. Huang and W. R. L. Lambrecht, *Phys. Rev. B*, 2013, **88**, 165203.
- [6] A. N. Belsky, P. Chevallier, E. N. Mel’chakov, C. Pédrini, P. A. Rodnyi and A. N. Vasil’ev, *Chem. Phys. Lett.*, 1997, **278**, 369–372.
- [7] S. Ono, R. El Ouenzerfi, A. Quema, H. Murakami, N. Sarukura, T. Nishimatsu, N. Terakubo, H. Mizuseki, Y. Kawazoe and A. Yoshikawa, *Jpn. J. Appl. Phys.*, 2005, **44**, 7285.
- [8] C. C. Stoumpos, L. Frazer, D. J. Clark, Y. S. Kim, S. H. Rhim, A. J. Freeman, J. B. Ketterson, J. I. Jang and M. G. Kanatzidis, *J. Am. Chem. Soc.*, 2015, **137**, 6804–6819.
- [9] M. C. Toroker, D. K. Kanan, N. Alidoust, L. Y. Isseroff, P. Liao and E. A. Carter, *Phys. Chem. Chem. Phys.*, 2011, **13**, 16644–16654.
- [10] H. Hosono, *Recent Progress in Transparent Electronics*, Wiley, 2010, chapter 2.
- [11] S. Tao, I. Schmidt, G. Brocks, J. Jiang, I. Tranca, K. Meerholz and S. Olthof, *Nat. Commun.*, 2019, **10**, 2560.
- [12] J. M. Ball and A. Petrozza, *Nat. Energy*, 2016, **1**, 11.
- [13] E. Conwell and V. F. Weisskopf, *Phys. Rev.*, 1950, **77**, 388–390.
